# Supplementary material for: Ecotoxicological risk assessment of pesticides against different aquatic and terrestrial species: using mechanistic QSTR and iQSTTR modelling approaches to fill the toxicity data gap
Source: Royal Society of Chemistry journal article supplement (doi:10.1039/d3gc03109h), 2023-12-05
Supplement: d3gc03109h1.pdf [file d3gc03109h1.pdf]

1                   **Electronic Supplementary Information**

2                                   **Fig. S1**

3           **Ecotoxicological risk assessment of pesticides against different**  
4 **aquatic and terrestrial species: using mechanistic QSTR and iQTTR**  
5 **modelling approaches to fill toxicity data gap**

6 Yishan Li<sup>a</sup>, Tengjiao Fan<sup>a,b</sup>, Ting Ren<sup>a</sup>, Na Zhang<sup>a</sup>, Lijiao Zhao<sup>a</sup>, Rugang Zhong<sup>a</sup>, Guohui Sun<sup>\*a</sup>

7

8 *<sup>a</sup>Beijing Key Laboratory of Environmental and Viral Oncology, Faculty of Environment and*  
9 *Life, Beijing University of Technology, Beijing 100124, P. R. China*

10 *<sup>b</sup>Department of Medical Technology, Beijing Pharmaceutical University of Staff and Workers*  
11 *(CPC Party School of Beijing Tong Ren Tang (Group) co., Ltd.), Beijing 100079, China*

12

13

14 \*Corresponding author: Guohui Sun (G. S.)

15 Tel.: +86-10-67391917

16 E-mail address: [sunguohui@bjut.edu.cn](mailto:sunguohui@bjut.edu.cn)

**Fig. S1**

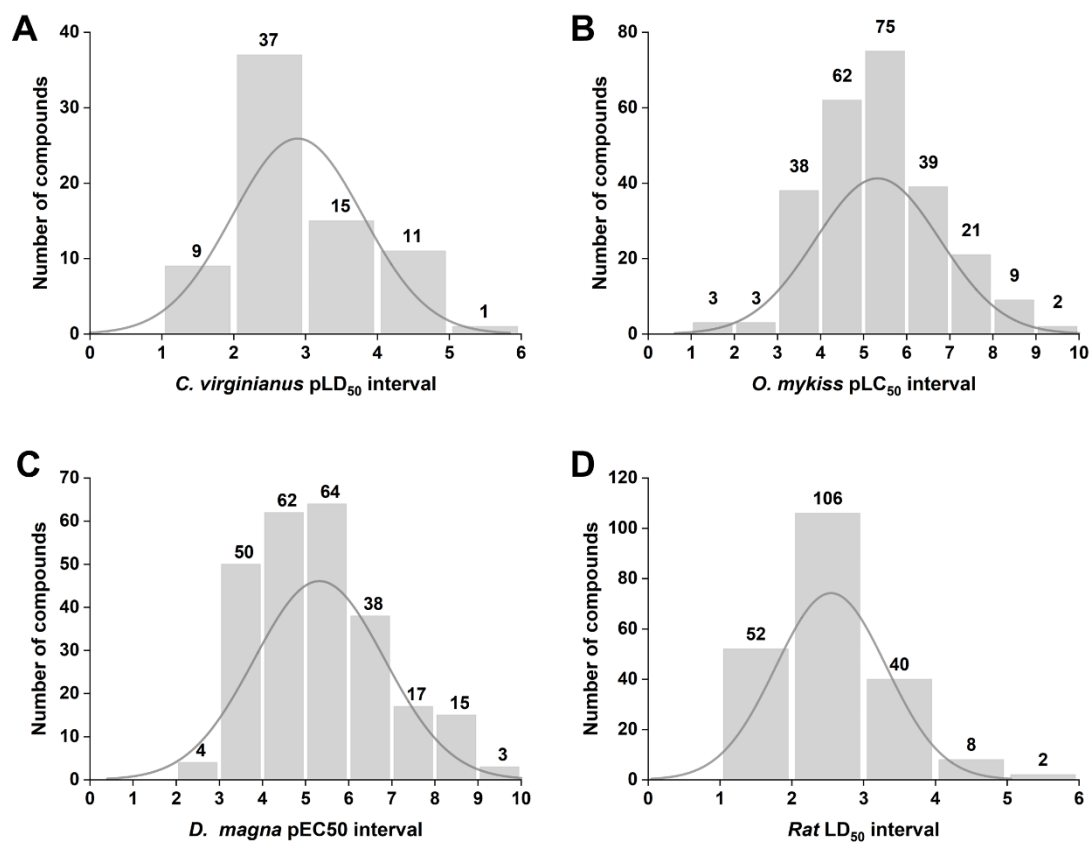

**Fig. S1.** Normal distribution plots of acute toxicity endpoint values of pesticides to four aquatic and terrestrial species used in QSTR model development: (A) *Colinus virginianus*, (B) *Oncorhynchus mykiss*, (C) *Daphnia magna*, and (D) *Rat*.
