# Supplementary material for: Ecotoxicological risk assessment of pesticides against different aquatic and terrestrial species: using mechanistic QSTR and iQSTTR modelling approaches to fill the toxicity data gap
Source: Royal Society of Chemistry journal article supplement (doi:10.1039/d3gc03109h), 2023-12-05
Supplement: d3gc03109h2.xlsx [file d3gc03109h2.xlsx]

## Sheet: content
All Supplementary Tables are presented in Corresponding Excel Sheets
Electronic Supplementary Information Table S1-S37
Ecotoxicological risk assessment of pesticides against different aquatic and terrestrial species: using mechanistic QSTR and iQSTTR modelling approaches to fill toxicity data gap
Yishan Lia, Tengjiao Fana,b, Ting Rena, Na Zhanga, Lijiao Zhaoa, Rugang Zhonga, Guohui Sun*,a
aBeijing Key Laboratory of Environmental and Viral Oncology, Faculty of Environment and Life, Beijing University of Technology, Beijing 100124, P. R. China bDepartment of Medical Technology, Beijing Pharmaceutical University of Staff and Workers (CPC Party School of Beijing Tong Ren Tang (Group) co., Ltd.), Beijing 100079, China
*Corresponding author: Guohui Sun; E-mail address: sunguohui@bjut.edu.cn (G.S); Tel.: +86-10-67391917
Content of Sheets
Table S1. The ID, CAS No., chemical names, and corresponding endpoint values for C.virginianus, D.magna, O.mykiss and Rat.
Table S2. Descriptor values, experimental and predicted pLD50 values, hat values and standardized residuals of all training, test, and true external compounds of the C-OStr model.
Table S3. Descriptor values, experimental and predicted pLC50 values, hat values and standardized residuals of all training, test, and true external compounds of the O-Rnd model.
Table S4. Descriptor values, experimental and predicted pEC50 values, hat values and standardized residuals of all training, test, and true external compounds of the D-Rnd model
Table S5. Descriptor values, experimental and predicted pLD50 values, hat values and standardized residuals of all training, test, and true external compounds of the R-ORes model
Table S6. Descriptor values, experimental and predicted pLD50 values, hat values and standardized residuals of all training, test, and true external compounds of R-C model.
Table S7. Descriptor values, experimental and predicted pLD50 values, hat values and standardized residuals of all training, test, and true external compounds of the C-R model.
Table S8. Descriptor values, experimental and predicted pLD50 values, hat values and standardized residuals of all training, test, and true external compounds of the C-O model.
Table S9. Descriptor values, experimental and predicted pLC50 values, hat values and standardized residuals of all training, test, and true external compounds of the O-D model
Table S10. Descriptor(s) values, experimental and predicted pLD50 values, hat values and standardized residuals of all training and test compounds of the C-D model.
Table S11. Descriptor(s) values, experimental and predicted pLD50 values, hat values and standardized residuals of all training and test compounds of the R-O model.
Table S12. Descriptor(s) values, experimental and predicted pLD50 values, hat values and standardized residuals of all training and test compounds of the R-D model.
Table S13. Statistical parameters used for internal and external validation in this study.
Table S14. Detailed results of the prediction quality for each compound in the test set of the C-OStr model.
Table S15. Detailed results of the prediction quality for each true external compound in the C-OStr model.
Table S16. Detailed results of the prediction quality for each compound in the test set of the O-Rnd model.
Table S17. Detailed results of the prediction quality for each true external compound in the O-Rnd model.
Table S18. Detailed results of the prediction quality for each compound in the test set of the D-Rnd model.
Table S19. Detailed results of the prediction quality for each true external compound in the D-Rnd model.
Table S20. Detailed results of the prediction quality for each compound in the test set of the R-ORes model.
Table S21. Detailed results of the prediction quality for each true external compound in the R-ORes model.
Table S22. Detailed results of the prediction quality for each compound in the test set of the R-C model.
Table S23. Detailed results of the prediction quality for each true external compound in the R-C model.
Table S24. Detailed results of the prediction quality for each compound in the test set of the C-R model.
Table S25. Detailed results of the prediction quality for each true external compound in the C-R model.
Table S26. Detailed results of the prediction quality for each compound in the test set of the C-O model.
Table S27. Detailed results of the prediction quality for each true external compound in the C-O model.
Table S28. Detailed results of the prediction quality for each compound in the test set of the O-D model.
Table S29. Detailed results of the prediction quality for each true external compound in the O-D model.
Table S30. The list of top20 most toxic pesticides predicted by the C-OStr QSTR model.
Table S31. The list of top20 most toxic pesticides predicted by the O-Rnd QSTR model.
Table S32. The list of top20 most toxic pesticides predicted by the D-Rnd QSTR model.
Table S33. The list of top20 most toxic pesticides predicted by the R-ORes QSTR model.
Table S34. The list of top5 most toxic pesticides predicted by the R-C iQSTTR model.
Table S35. The list of top5 most toxic pesticides predicted by the C-O iQSTTR model.
Table S36. The list of top5 most toxic pesticides predicted by the C-R iQSTTR model.
Table S37. The list of top5 most toxic pesticides predicted by the O-D iQSTTR model.

## Sheet: Table S1
Table S1. The ID, CAS No., chemical names, and corresponding endpoint values for C.virginianus, D.magna, O.mykiss and Rat.
	ID	CAS-NO	Chemical Name	pLD50 (C.virginianus)	pEC50 (D.magna)	pLC50 (O.mykiss)	pLD50 (Rat)
	1	96-12-8	1,2 dibromo-3-chloropropane	/	/	3.82	3.14
	2	643-79-8	1,2-Benzenedicarboxaldehyde (uses canceled)	/	6.17	6.46	/
	3	2634-33-5	1,2-Benzisothiazolin-3-one	2.07	4.83	5.3	2.17
	4	4299-07-4	1,2-Benzisothiazolin-3-one, 2-butyl	2.22	/	/	/
	5	7779-27-3	1,3,5-Triethylhexahydro-s-triazine,Vancide TH	/	3.92	3.77	2.73
	6*	131929-63-0	Spinosyn D	/	/	/	/
	7	34375-28-5	2-(N-Hydroxy-N-methyl-amino)ethanol	1.72	3.56	/	/
	8	94-75-7	2,4-Dichlorophenoxyacetic acid	2.77	3.95	2.98	2.77
	9	1929-73-3	2-Butoxyethyl 2,4-dichlorophenoxyacetate	/	4.65	5.19	2.59
	10	25168-26-7	2,4-D Isooctyl Ester	/	6.79	/	2.53
	11	94-11-1	2,4-D Isopropyl Ester	2.15	5.01	5.66	2.58
	12	94-82-6	4-(2,4-Dichlorophenoxy)butanoic acid	/	3.99	4.24	2.55
	13	120-32-1	2-Benzyl-4-chlorophenol (Nipacide BCP)	/	5.57	5.48	2.11
	14	118-93-4	2-Hydroxyacetophenone	/	3.46	/	/
	15	3547-33-9	2-(Octylthio)Ethanol	/	5.71	4.82	1.35
	16	2527-66-4	2-Methyl-1,2-benzisothiazolin-3-one (MBIT)	2.76	5.25	5.84	/
	17	85264-33-1	(3,5-Dimethyl-1H-pyrazol-1-yl)methanol	2.22	3.6	3.01	/
	18	6515-38-4	3,5,6-Trichloro-2-pyridinol	2	/	4.2	2.39
	19	131983-72-7	Triticonazole	/	4.62	/	/
	20	55406-53-6	3-Iodo-2-propynyl butylcarbamate (IPBC)	2.57	5.7	6.61	/
	21	1192-52-5	4,5-Dichloro-3H-1,2-dithiol-3-one	2.77	8.02	7.13	/
	22	64359-81-5	4,5-Dichloro-2-n-octyl-3(2H)-isothiazolone	/	7.73	/	/
	23*	504-24-5	4-Aminopyridine (Avitrol)	/	/	/	/
	24	88-04-0	4-Chloro-3,5-xylenol (Nipacide MX)	/	4.31	5.31	1.61
	25	59-50-7	4-Chloro-3-methylphenol	1.97	4.79	5.19	1.89
	26	30560-19-1	Acephate	/	/	3.22	2.42
	27	57960-19-7	Acequinocyl	/	7.42	/	/
	28*	160430-64-8	Acetamiprid	/	/	/	/
	29	135158-54-2	Acibenzolar-s-methyl	/	4.86	5.38	/
	30*	915972-17-7	Afidopyropen	/	/	/	/
	31	116-06-3	Aldicarb	4.98	5.44	4.43	/
	32	1646-88-4	Aldoxycarb	/	5.9	3.72	4.05
	33	107-18-6	Allyl Alcohol	/	/	4.73	2.96
	34	96-24-2	alpha-Chlorohydrin	/	2.06	/	/
	35	4151-50-2	Sulfluramid	3.05	6.15	/	2.99
	36	834-12-8	Ametryn	/	3.91	4.83	2.65
	37	129909-90-6	Amicarbazone	2.09	3.77	/	/
	38	2032-59-9	Aminocarb	/	/	4.47	/
	39	858954-83-3	Aminocyclopyrachlor-methyl	/	4.03	4.21	/
	40	33089-61-1	Amitraz	3.62	/	/	2.87
	41	101-05-3	Anilazine	/	5.46	6.29	2.01
	42*	116095-18-2	Antimycin A	/	/	/	/
	43	1912-24-9	Atrazine	2.45	/	4.61	2.51
	44	131860-33-8	Azoxystrobin	2.3	/	5.93	/
	45	16079-88-2	1-Bromo-3-chloro-5,5-dimethylimidazolidine-2,4-dione	2.35	5.21	5.73	2.24
	46	22781-23-3	Bendiocarb	4.07	6.88	5.22	3.75
	47	1861-40-1	Benfluralin	/	/	6.62	1.53
	48	17804-35-2	Benomyl	/	5.93	6.23	1.46
	49	741-58-2	Bensulide	/	/	5.74	3.17
	50*	27519-02-4	(Z)-9-Tricosene	/	/	/	/
	51	1072957-71-1	Benzovindiflupyr (Solatenol)	2.46	6.67	/	/
	52	120-51-4	Benzyl benzoate	/	/	5.18	/
	53	68359-37-5	beta Cyfluthrin	/	9.48	9.45	2.68
	54	163269-30-5	Bethoxazin BTCN metabolite (Canceled in U.S.)	/	/	6.76	/
	55	149877-41-8	Bifenazate	/	6.09	/	/
	56	55179-31-2	Bitertanol	/	4.68	/	/
	57	581809-46-3	Bixafen	/	5.58	6.75	/
	58	188425-85-6	Boscalid	/	/	5.1	/
	59	314-40-9	Bromacil	2.06	3.33	3.86	2.61
	60	28772-56-7	Bromadiolone	/	5.42	/	/
	61	63333-35-7	Bromethalin	/	8.21	/	/
	62	7166-19-0	Bromonitrostyrene	/	6.98	6.93	/
	63	1689-84-5	Bromoxynil phenol	/	4.16	5.12	3.16
	64	116255-48-2	Bromuconazole	/	/	5.35	3.01
	65	52-51-7	Bronopol	/	5.1	3.94	3.05
	66*	29911-28-2	1-(2-Butoxy-1-methylethoxy)propan-2-ol	/	/	/	/
	67	33629-47-9	Butralin	/	6.41	5.9	2.07
	68	2008-41-5	Butylate	/	4.26	4.69	1.74
	69	2939-80-2	cis-Captafol (Cancelled in U.S.)	/	3.59	7.06	1.84
	70	63-25-2	Carbaryl	/	/	5.22	2.94
	71	10605-21-7	Carbendazim	/	5.83	5.71	1.48
	72	1563-66-2	Carbofuran	4.64	6.88	5.74	/
	73	5234-68-4	Carboxin	/	3.45	5.04	2.74
	74	95266-40-3	Trinexapac-ethyl (Cimecticarb)	/	/	3.58	1.75
	75	122453-73-0	Chlorfenapyr AC 312,094 metabolite	2.38	6.81	/	/
	76	2536-31-4	Chlorflurenol methyl	/	/	4.99	1.95
	77	76-06-2	Chloropicrin	/	/	7.31	2.82
	78	101-10-0	2-(3-Chlorophenoxy)propionic acid	2.18	/	/	/
	79	1897-45-6	Chlorothalonil	/	6.69	6.91	1.42
	80	101-21-3	Chlorpropham	/	4.76	4.57	2.25
	81	2921-88-2	Chlorpyrifos	/	8.59	7.46	3.63
	82	5598-13-0	Chlorpyrifos methyl	/	8.46	7.41	2.25
	83*	14371-10-9	Cinnamaldehyde	/	/	/	/
	84	2686-99-9	3,4,5-Trimethylphenyl methylcarbamate	/	/	4.61	3.04
	85	210880-92-5	Clothianidin	/	3.59	/	/
	86	56-72-4	Coumaphos	5.19	/	5.61	4.45
	87	21725-46-2	Cyanazine	/	3.76	/	3.21
	88	120116-88-3	Cyazofamid CCIM degradate	/	5.9	/	/
	89	1031756-98-5	Cyclaniliprole	/	6.87	/	/
	90	1134-23-2	Cycloate	/	3.95	4.57	2.11
	91	180409-60-3	Cyflufenamid	/	4.07	5.6	/
	92	400882-07-7	Cyflumetofen A-2 metabolite CAS 3288-99-1	/	/	4.8	/
	93	187166-15-0	Spinetoram L	/	6.95	/	/
	94	57966-95-7	Cymoxanil	/	3.85	3.51	2.26
	95	52315-07-8	Cypermethrin	/	8.97	8.75	3.86
	96	39515-40-7	Cyphenothrin	/	8.61	9.01	3.07
	97	94361-06-5	Cyproconazole	3.29	4.05	4.19	2.46
	98	121552-61-2	Cyprodinil	/	6.85	4.97	/
	99	66215-27-8	Cyromazine	1.97	/	/	1.69
	100	1596-84-5	Daminozide	/	3.21	/	1.28
	101	533-74-4	Dazomet	/	4.13	6.01	2.71
	102	10222-01-2	2,2-Dibromo-2-cyanoacetamide	/	5.43	/	/
	103	50-29-3	DDT (Cancelled in U.S.)	/	7.88	7.94	3.61
	104	112-30-1	1-Decanol	/	4.39	/	1.53
	105	52918-63-5	Deltamethrin	2.35	8.39	8.74	4.73
	106	333-41-5	Diazinon	4.78	/	/	3.66
	107	35691-65-7	1,2-Dibromo-2,4-dicyanobutane	/	5.08	5.2	2.71
	108	1194-65-6	2,6-Dichlorobenzonitrile	2.4	4.44	4.39	1.8
	109	37764-25-3	Dichlormid	2.13	3.17	3.17	2.02
	110	72-54-8	p,p'-DDD	/	/	6.66	3.45
	111	118-52-5	1,3-Dichloro-5,5-dimethylhydantoin	2.06	5.62	5.34	2.56
	112	15165-67-0	Dichlorprop P	2.82	/	/	/
	113	62-73-7	Dichlorvos	4.4	4.4	/	/
	114	51338-27-3	Diclofop-methyl	/	6.17	6.2	2.82
	115	99-30-9	2,6-Dichloro-4-nitroaniline	2.36	5	5.57	1.94
	116	145701-21-9	Diclosulam	/	3.75	/	/
	117	2227-17-0	Dienochlor	2.83	/	/	2.6
	118	38727-55-8	Diethatyl ethyl (cancelled in the U.S.)	/	/	5.04	2.13
	119	134-62-3	Diethyl toluamide (DEET)	2.14	/	3.43	1.99
	120	56073-07-5	Difenacoum	/	5.86	6.82	2.82
	121	119446-68-3	Difenoconazole	/	5.72	5.64	2.45
	122	104653-34-1	Difethialone	/	8.09	7.02	/
	123	35367-38-5	Diflubenzuron	/	/	3.35	1.83
	124	20018-09-1	Diiodomethyl p-tolyl sulfone	/	6.38	6.51	/
	125	55290-64-7	Dimethepin	/	4.01	3.57	2.26
	126	60-51-5	Dimethoate	4.29	/	4.27	3.58
	127	624-92-0	Dimethyl disulfide TC	/	/	4.99	/
	128	29091-05-2	Dinitramine	/	5.39	/	2.03
	129	131-72-6	Dinocap	/	/	/	2.57
	130	82-66-6	Diphacinone	/	5.28	/	/
	131	136-45-8	Dipropyl isocinchomeronate	2.27	4.14	/	1.68
	132	298-04-4	Disulfoton	3.85	7.32	5.05	5.02
	133	97886-45-8	Dithiopyr	/	4.37	/	/
	134	330-54-1	Diuron	/	/	5.08	2.36
	135*	126535-15-7	Triflusulfuron methyl	/	/	/	/
	136	26002-80-2	D-Phenothrin (Sumithrin)-S-1712	/	8.37	7.93	/
	137	1582-09-8	Trifluralin	/	6.13	6.79	2.24
	138	122454-29-9	Tralopyril	/	4.54	/	/
	139	115-29-7	Endosulfan	3.99	6.39	8.62	4.35
	140	1031-07-8	Endosulfan sulfate metabolite(PC Code 079404)	3.98	6.15	/	/
	141	72-20-8	Endrin (Cancelled in U.S.)	/	/	8.71	5.1
	142	759-94-4	EPTC (S-Ethyl dipropylthiocarbamate)	/	4.17	3.97	2.32
	143	66230-04-4	Esfenvalerate	3.04	/	/	3.11
	144	162650-77-3	Ethaboxam	/	5.83	5.17	/
	145	55283-68-6	Ethalfluralin	/	/	6.39	1.52
	146	16672-87-0	Ethephon N-methyl-2-pyrrolidone	1.74	/	1.68	1.63
	147	26225-79-6	Ethofumesate	/	/	4.3	2.4
	148	13194-48-4	Ethoprop	/	6.42	/	3.64
	149	91-53-2	Ethoxyquin	/	5.04	4.08	2.43
	150	96-45-7	Ethylenethiourea (ETU) degradate	/	3.58	/	1.75
	151	80844-07-1	Etofenprox	/	/	8.26	/
	152	153233-91-1	Etoxazole	/	7.7	/	/
	153	131807-57-3	Famoxadone	/	7.5	7.49	/
	154	161326-34-7	Fenamidone	/	6.42	5.62	/
	155	60168-88-9	Fenarimol	/	4.71	4.96	2.12
	156	120928-09-8	Fenazaquin	/	7.74	7.9	3.35
	157	114369-43-6	Fenbuconazole	/	5.17	5.35	/
	158	126833-17-8	Fenhexamid-benzoxazole	/	5.43	5.95	/
	159	122-14-5	Fenitrothion	4.07	7.4	5.19	3.04
	160	66441-23-4	Fenoxaprop-ethyl	/	5.06	/	2.19
	161	71283-80-2	Fenoxaprop-p-ethyl	/	3.46	/	/
	162	72490-01-8	Fenoxycarb	/	5.88	5.43	/
	163	39515-41-8	Fenpropathrin 4-OH metabolite	/	7.11	/	3.67
	164	67564-91-4	Fenpropimorph	/	5.25	4.94	2.01
	165	134098-61-6	Fenpyroximate	/	8.07	8.66	3.24
	166	55-38-9	Fenthion	4.59	7.73	5.61	3.19
	167	51630-58-1	Fenvalerate	/	/	/	3.78
	168	104040-78-0	Flazasulfuron	/	3.39	3.55	/
	169	69806-50-4	Fluazifop-butyl	/	3.13	/	2.12
	170	79622-59-6	Fluazinam	2.42	6.37	6.8	/
	171	33245-39-5	Fluchloralin (uses canceled in U.S.)	/	5.8	6.98	2.08
	172	131341-86-1	Fludioxonil	/	5.44	5.72	/
	173	318290-98-1	Fluensulfone	2.29	4.12	3.89	/
	174	142459-58-3	Flufenacet	/	4.06	4.79	/
	175	188489-07-8	Flufenpyr-ethyl	/	/	5.04	/
	176	62924-70-3	Flumetralin	/	/	7.21	2.13
	177	98967-40-9	Flumetsulam	/	3.11	/	/
	178	2164-17-2	Fluometuron	/	/	4.42	2.2
	179	239110-15-7	Fluopicolide	/	/	6.04	/
	180	361377-29-9	Fluoxastrobin	/	5.98	6.02	/
	181	951659-40-8	Flupyradifurone	3.09	/	/	/
	182	59756-60-4	Fluridone	/	4.76	4.69	/
	183	56425-91-3	Flurprimidol	/	4.45	4.26	2.64
	184	117337-19-6	Fluthiacet methyl	/	/	6.97	/
	185	66332-96-5	Flutolanil	/	/	4.78	1.51
	186	76674-21-0	Flutriafol	2.57	/	/	2.42
	187	69409-94-5	Fluvalinate	/	/	7.56	3.28
	188	907204-31-3	Fluxapyroxad	/	4.75	5.8	/
	189	133-07-3	Folpet phthalimide degradate	/	/	/	2.28
	190	944-22-9	Fonofos	/	/	6.85	4.91
	191	64700-56-7	Triclopyr butoxyethyl ester	/	5.32	5.74	/
	192	81-81-2	Warfarin	/	3.64	/	/
	193	98-01-1	Furfural	/	3.67	4.24	3.17
	194	88-30-2	Trifluoro-4-nitro-m-cresol (TFM)	/	/	5.07	/
	195	68694-11-1	Triflumizole	/	/	5.78	2.68
	196	1071-83-6	Glyphosate N-(phosphonomethyl) glycine	/	3.1	/	/
	197	943831-98-9	Halauxifen methyl	/	5.21	5.24	/
	198	69806-34-4	Haloxyfop acid	/	3.57	/	/
	199	76-44-8	Heptachlor (Cancelled in U.S.)	/	/	7.73	3.97
	200	53042-79-8	Hexadecadienol acetate	/	5.6	3.47	/
	201*	86479-06-3	Hexaflumuron	/	/	/	/
	202	1929-77-7	Vernolate	/	4.64	4.76	2.23
	203	51235-04-2	Hexazinone	/	3.22	/	2.17
	204	78587-05-0	Hexythiazox PT-1-2 degradate	/	4.3	/	/
	205	67485-29-4	Hydramethylnon	/	/	6.82	2.64
	206	10004-44-1	Hymexazol	/	3.51	/	1.5
	207	35554-44-0	Imazalil	/	4.97	5.17	3.12
	208	122548-33-8	Imazosulfuron	/	4.11	/	/
	209	138261-41-3	Imidacloprid	3.22	3.48	3.05	2.79
	210	133-32-4	Indole-3-butyric acid	/	3.55	/	/
	211	173584-44-6	Indoxacarb IN-JT333-20 degradate	2.51	6.92	7.49	/
	212	50471-44-8	Vinclozolin	/	4.89	5	1.46
	213	125225-28-7	Ipconazole	2.54	5.29	5.34	/
	214	36734-19-7	Iprodione	/	6.14	4.9	1.97
	215	28159-98-0	Irgarol	/	4.68	/	/
	216	25311-71-1	Isofenphos metabolite	/	8.33	/	4.21
	217	875915-78-9	Isofetamid	/	4.88	5.11	/
	218	163520-33-0	Isoxadifen-ethyl	/	5.76	5.94	/
	219	141112-29-0	Isoxaflutole	/	5.38	3.35	/
	220*	76703-62-3	Lambda-Cyhalothrin	/	/	/	/
	221	3380-34-5	Triclosan	2.55	5.87	6	1.89
	222	608-73-1	Lindane	/	/	/	3.46
	223	330-55-2	Linuron	/	5.36	4.91	2.34
	224	121-75-5	Malathion	3.89	/	/	3.06
	225	374726-62-2	Mandipropamid	/	4.13	4.97	/
	226	16484-77-8	Mecoprop-P	/	/	3.1	2.31
	227	70630-17-0	Mefenoxam	2.45	3.72	/	/
	228	1417782-03-6	Mefentrifluconazole	2.69	5.18	5.87	/
	229	104206-82-8	Mesotrione	/	3.36	/	/
	230	139968-49-3	Metaflumizone	/	6.92	/	/
	231	57837-19-1	Metalaxyl	/	3.57	3.33	2.69
	232	108-62-3	Metaldehyde	/	/	3.43	2.89
	233	125116-23-6	Metconazole cis	2.58	/	/	/
	234	950-37-8	Methidathion	/	/	7.4	4.18
	235	2032-65-7	Methiocarb	/	/	5.51	4.05
	236	16752-77-5	Methomyl	/	3.9	5.12	4.04
	237	72-43-5	Methoxychlor	/	/	6.98	2.27
	238	161050-58-4	Methoxyfenozide	/	5	/	1.87
	239	134-20-3	Methyl anthralinate	/	/	3.8	1.72
	240	74-83-9	Methyl bromide	3.11	4.56	/	/
	241*	187166-40-1	Spinetoram J	/	/	/	/
	242	556-61-6	Methyl isothiocyanate	/	6.05	6.15	3.01
	243	112-12-9	Methyl nonyl ketone	/	5.5	/	1.53
	244	6317-18-6	Methylene bis(thiocyanate)	/	6.38	5.73	3.37
	245	240494-70-6	Metofluthrin	/	7.88	8.48	/
	246	51218-45-2	Metolachlor	/	4.08	3.77	2.11
	247	220899-03-6	Metrafenone CL 4084564 metabolite	/	3.91	4.41	/
	248	21087-64-9	Metribuzin	/	/	3.45	2.29
	249	113-48-4	N-(2-Ethylhexyl)-5-norbornene-2,3-dicarboximide	/	/	6.21	1.99
	250	51596-11-3	Milbemycin A4	/	7.73	/	/
	251	2212-67-1	Molinate	/	/	5.49	2.71
	252*	131929-60-7	Spinosyn A	/	/	/	/
	253	82633-79-2	2-Methyl-4,5-trimethylene-4-isothiazolin-3-one	/	5.08	/	/
	254	288-88-0	1H-1,2,4-Triazole metabolite	1.95	/	/	1.6
	255	‘68-12-2	N,N Dimethyl formamide	/	/	1.01	/
	256	1214-39-7	N6-Benzyladenine	2.15	4.08	/	2.03
	257	86-87-3	1-Naphthylacetic acid	/	3.01	3.82	2.27
	258	15299-99-7	Napropamide	/	4.04	/	1.73
	259	4437-85-8	4-Ethyl-1,3-dioxolan-2-one	/	2.11	2.4	/
	260*	40716-66-3	Neurolidol	/	/	/	/
	261	141517-21-7	Trifloxystrobin	/	7.21	7.46	/
	262	1929-82-4	Nitrapyrin	/	4.6	4.42	2.39
	263	120-94-5	N-Methyl-2-pyrrolidine	/	/	1.45	/
	264	872-50-4	N-Methyl-2-pyrrolidone	1.58	/	/	1.52
	265	27314-13-2	Norflurazon	/	/	4.57	1.58
	266	116714-46-6	Novaluron 275-352 metabolite	/	5.41	6	/
	267	121451-02-3	Noviflumuron	/	9.23	/	/
	268	26530-20-1	Octhilinone	/	6.02	6.64	2.59
	269	1113-02-6	Omethoate (Dimethoate Degradate)	4.35	/	/	3.85
	270	90-43-7	2-Phenylphenol	/	4.83	4.7	1.93
	271*	213464-77-8	Orthosulfamuron	/	/	/	/
	272	19044-88-3	Oryzalin	2.83	5.38	5	1.54
	273	19666-30-9	Oxadiazon	/	5.41	5.49	1.99
	274	77732-09-3	Oxadixyl (canceled in the U.S.)	/	2.72	/	2.18
	275	23135-22-0	Vydate	4.4	5.74	4.72	/
	276	1003318-67-9	Oxathiapiprolin	/	5.93	/	/
	277	7747-35-5	Oxazolidine E (Bioban CS-1246)	/	3.53	2.81	/
	278	301-12-2	Oxydemeton-methyl	/	/	5.53	3.91
	279	76738-62-0	(2R,3R)-1-(4-Chlorophenyl)-4,4-dimethyl-2-(1,2,4-triazol-1-yl)pentan-3-ol	/	/	4.02	/
	280	111578-32-6	Metobenzuron	/	5.73	6.07	/
	281	106-46-7	Paradichlorobenzene	1.96	/	/	2.47
	282	100-02-7	Paranitrophenol	/	3.82	4.2	2.84
	283	56-38-2	Parathion	/	/	5.42	/
	284	1114-71-2	Pebulate	/	4.47	4.44	2.34
	285	112-05-0	Pelargonic nonanionic acid	/	3.22	3.24	/
	286	82-68-8	Pentachloronitrobenzene (PCNB)	/	5.58	/	2.43
	287	87-86-5	Pentachlorophenol	/	6.05	6.55	/
	288	183675-82-3	Penthiopyrad	/	5.15	5.97	/
	289	52645-53-1	Permethrin	/	8.81	/	3.01
	290	65954-19-0	Tridecen-1-yl acetate (Z and E acetates)	/	5.02	/	/
	291	13684-63-4	Phenmedipham	/	5.17	5.32	1.88
	292	732-11-6	Phosmet	/	7.75	6.32	3.54
	293	96182-53-5	Phostebupirim	/	/	6.57	/
	294	119515-38-7	Picaridin	/	/	3.12	1.68
	295	1918-02-1	Picloram	/	/	4.89	1.47
	296	117428-22-5	Picoxystrobin	/	4.66	6.72	/
	297	243973-20-8	Pinoxaden	/	/	4.51	/
	298	3478-94-2	Piperalin	/	5.24	/	2.12
	299	23103-98-2	Pirimicarb	/	/	3.64	3.38
	300	29232-93-7	Pirimiphos-methyl	/	/	/	2.39
	301	86209-51-0	Primisulfuron-methyl	/	/	3.35	/
	302	1610-18-0	Prometon	/	3.94	4.06	2.65
	303	7287-19-6	Prometryn	/	4.17	4.75	2.06
	304	1918-16-7	Propachlor	3.38	4.43	6.1	2.47
	305	709-98-8	Propanil	3.04	/	/	2.77
	306	139-40-2	Propazine	/	/	4.33	1.78
	307	114-26-1	Propoxur	/	/	4.75	3.71
	308	79-09-4	Proprionic acid	/	/	3.16	/
	309	83657-17-4	Uniconazole	2.3	/	4.29	2.83
	310	23950-58-5	Propyzamide (Pronamide)	/	/	4.38	1.88
	311	178928-70-6	Prothioconazole	/	5.25	5.28	/
	312	1228284-64-7	3-(Difluoromethyl)-N-methoxy-1-methyl-N-(1-methyl-2-(2,4,6-trichlorophenyl)ethyl)-1H-pyrazole-4-carboxamide	/	6.01	6.36	/
	313	123312-89-0	Pymetrozine	/	3.4	/	1.57
	314	175013-18-0	Pyraclostrobin	/	7.39	7.8	/
	315	129630-19-9	Pyraflufen-ethyl E-3 degradate	/	5.81	/	/
	316	96489-71-3	Pyridaben	/	8.55	8.38	2.81
	317	179101-81-6	Pyridalyl	/	6.13	/	/
	318	55512-33-9	Pyridate CL-9673 Metabolite	/	/	/	2.28
	319	337458-27-2	Pyrifluquinazon	2.52	/	4.9	/
	320	53112-28-0	Pyrimethanil	/	4.82	4.29	/
	321	95737-68-1	Pyriproxyfen	/	5.9	/	/
	322	84087-01-4	Quinclorac	/	3.91	/	2.04
	323	124495-18-7	Quinoxyfen	/	6.57	6.06	/
	324	76578-14-8	Quizalofop-ethyl	/	4.87	5.67	2.4
	325	100646-51-3	Quizalofop-p-ethyl	/	3.86	5.97	2.5
	326	122931-48-0	Rimsulfuron	/	3.38	/	/
	327	83-79-4	Rotenone	/	8.03	/	3.82
	328	874967-67-6	Sedaxane	/	4.75	5.52	/
	329	74051-80-2	Sethoxydim	/	3.63	3.28	2.01
	330	1982-49-6	Siduron	/	/	4.34	1.67
	331	122-34-9	Simazine	/	5.26	/	2.32
	332	87392-12-9	S-Metolachlor	/	4.04	4.38	/
	333	283594-90-1	Spiromesifen	/	/	7.34	/
	334	203313-25-1	Spirotetramat	/	/	5.17	/
	335	118134-30-8	Spiroxamine	/	4.8	/	/
	336	3689-24-5	Sulfotepp	/	/	5.51	4.81
	337	2687-94-7	1-Octylpyrrolidin-2-one	/	4.41	4.04	1.98
	338	2687-96-9	1-Dodecyl-2-pyrrolidinone	/	6.26	5.7	1.7
	339	107534-96-3	Tebuconazole	/	4.95	4.97	1.96
	340	112410-23-8	Tebufenozide	/	4.97	4.82	/
	341	119168-77-3	Tebufenpyrad	/	6.92	7.27	2.75
	342	34014-18-1	Tebuthiuron	/	2.89	3.2	2.55
	343	79538-32-2	Tefluthrin	/	9.78	/	/
	344	335104-84-2	Tembotrione	/	3.95	/	/
	345	5902-51-2	Terbacil	/	3.52	3.67	2.11
	346	5915-41-3	Terbuthylazine	/	/	4.83	2.1
	347	886-50-0	Terbutryn	/	4.95	/	2.07
	348	961-11-5	Tetrachlorvinphos	/	8.28	/	1.96
	349	112281-77-3	Tetraconazole	/	5.08	/	/
	350	58842-20-9	Nithiazine	1.84	3.68	3.14	/
	351	7696-12-0	Tetramethrin	/	6.87	7.95	1.85
	352	148-79-8	Thiabendazole	/	5.54	5.23	1.99
	353	111988-49-9	Thiacloprid	/	4.05	3.92	2.76
	354	117718-60-2	Thiazopyr	/	4.81	5.07	/
	355	51707-55-2	Thidiazuron	/	4.45	4.52	1.61
	356	28249-77-6	Thiobencarb	/	/	5.35	2.45
	357	59669-26-0	Thiodicarb	2.24	6.96	/	/
	358	23564-05-8	Thiophanate-methyl	/	4.81	4.49	1.71
	359	137-26-8	Thiram	/	/	6.45	2.63
	360	330459-31-9	Tioxazafen	1.71	5.44	6.55	/
	361	57018-04-9	Tolclofos-methyl	/	/	5.59	/
	362	129558-76-5	Tolfenpyrad	3.64	/	/	/
	363	731-27-1	Tolylfluanid	/	6.26	/	2.54
	364	66840-71-9	N,N-Dimethyl-N'-p-tolylsulphamide	/	3.84	3.79	/
	365	66841-25-6	Tralomethrin	/	/	/	3.83
	366	43121-43-3	Triadimefon	/	4.61	4.86	2.91
	367	2303-17-5	Triallate	/	6.07	5.4	2.58
	368*	112143-82-5	Triazamate	/	/	/	/
	369	78-48-8	Tribufos	/	7.67	5.43	3.32
	370	52-68-6	Trichlorfon	4.06	/	5.35	2.76
	371	87-90-1	Trichloroisocyanurate	/	5.56	/	2.76
	372	‘7673-09-8	Trichloromelamine	/	5.28	4.88	/
	373	55335-06-3	Triclopyr acid	/	3.29	/	2.61
	374	2665-13-6	2,2'-(1-Methyltrimethylenedioxy)bis(4-methyl-1,3,2-dioxaborinane)	/	2.59	3.6	/
	375	2593-15-9	Etridiazole	/	4.91	5.19	2.36
	376	120068-37-3	Fipronil	/	/	7.11	/
	377	74-88-4	Iodomethane	3.4	5.02	/	/
	378	609346-29-4	Momfluorothrin	/	7.69	8.51	/
Compounds with "*" were not appeared in QSTR and iQSTTR model development but funtion as part of true external sets

## Sheet: S2
Table S2. Experimental and predicted endpoint values of each compounds in the four best QSTR models
	DRnd							ORnd							CStr							Rre
	Training set			Test set				Training set			Test set				Training set			Test set				Training set			Test set
	ID	Exp. endpoint	Pred. by model eq.	ID	Exp. endpoint	Pred. by model eq.		ID	Exp. endpoint	Pred. by model eq.	ID	Exp. endpoint	Pred. by model eq.		ID	Exp. endpoint	Pred. by model eq.	ID	Exp. endpoint	Pred. by model eq.		ID	Exp. endpoint	Pred. by model eq.	ID	Exp. endpoint	Pred. by model eq.
	2	6.1733	4.1001	3	4.8293	4.6945		1	3.8233	5.2742	11	5.6567	5.1251		4	2.2166	2.2579	3	2.0673	2.4304		3	2.1709	1.6836	1	3.1431	3.4656
	5	3.9188	3.8917	19	4.6213	4.675		2	6.4648	4.6153	15	4.8172	5.1111		8	2.7681	2.052	7	1.7183	1.8454		5	2.734	2.3366	12	2.5513	2.4026
	7	3.5582	3.2564	24	4.3083	4.5841		3	5.3045	5.3744	25	5.1917	5.1055		11	2.1462	2.8515	21	2.7656	2.0487		8	2.7704	2.3646	33	2.9578	2.8905
	8	3.9465	3.3851	27	7.4235	6.1819		5	3.7691	3.3546	31	4.4257	4.3574		16	2.7586	2.6304	40	3.6187	3.7099		9	2.5872	2.6701	40	2.8654	2.5956
	9	4.6494	4.6697	39	4.0289	4.157		8	2.9752	4.6272	48	6.2324	4.9333		17	2.2207	2.5778	46	4.07	4.5022		10	2.5306	2.6427	43	2.5064	2.2486
	10	6.7903	5.5161	46	6.8834	5.8793		9	5.1866	5.5978	53	9.4475	9.2767		20	2.5744	2.4689	97	3.2889	2.6061		11	2.575	2.4792	48	1.4629	1.8863
	11	5.0052	5.0064	51	6.6707	5.7778		12	4.241	4.7126	62	6.9266	5.356		25	1.9665	2.3765	106	4.7844	4.6233		13	2.1094	2.6239	64	3.0142	2.5096
	12	3.9932	3.8633	53	9.4794	8.6581		13	5.4825	5.3154	65	3.9355	3.7782		31	4.9783	4.0572	111	2.0602	2.0965		15	1.3486	2.5982	77	2.8179	3.2082
	13	5.569	5.2055	55	6.0938	5.5976		16	5.8378	5.6404	68	4.6908	4.2423		35	3.0462	2.8015	112	2.8222	2.608		18	2.3945	2.1231	97	2.4564	2.2002
	14	3.4564	3.8895	61	8.2129	8.0765		17	3.011	4.3972	70	5.2245	4.7854		37	2.0892	2.8455	119	2.1433	2.7454		24	1.6116	1.9763	99	1.6908	2.0131
	15	5.7114	5.1815	71	5.8292	4.6552		18	4.1972	4.8327	94	3.5117	2.8679		43	2.4484	3.3364	131	2.2698	2.327		25	1.8916	2.0924	103	3.6101	2.9023
	16	5.2542	5.6658	90	3.953	4.4109		20	6.6069	5.2575	95	8.7473	8.9859		45	2.3535	2.1034	132	3.8473	4.0085		26	2.4178	3.0649	104	1.5255	2.0709
	17	3.5999	4.1994	94	3.8499	3.9518		21	7.1259	5.9072	101	6.0062	4.9753		51	2.4624	2.1511	173	2.286	2.4677		32	4.0458	3.214	107	2.713	3.1492
	20	5.7022	3.7161	97	4.0501	4.4074		24	5.314	4.921	109	3.169	4.5789		59	2.0647	2.1298	272	2.8348	3.4352		35	2.9872	2.6113	110	3.4521	2.9593
	21	8.0168	6.349	114	6.1713	5.6889		26	3.2215	3.3753	114	6.1972	5.9129		72	4.6425	3.9699	275	4.3994	3.8757		36	2.6508	2.471	125	2.2621	2.3802
	22	7.7329	5.8786	115	5	5.3733		29	5.3784	5.516	118	5.039	5.0216		75	2.3836	2.4193	350	1.8448	1.9997		41	2.0088	1.5962	137	2.2399	1.7718
	25	4.7923	4.5869	133	4.3731	6.0604		32	3.7236	3.9507	119	3.4289	4.1867		78	2.1831	2.7416	360	1.7052	2.1456		45	2.2398	2.3875	146	1.6284	2.076
	29	4.8604	5.0033	137	6.1257	5.7855		33	4.7306	3.3904	122	7.0244	6.3601		86	5.1868	4.4092	370	4.0604	3.4252		46	3.7467	2.6403	160	2.1861	2.71
	31	5.4368	4.7597	138	4.5368	5.947		36	4.8252	4.4808	125	3.5747	4.0858		99	1.9689	2.0363					47	1.5254	1.8383	163	3.6741	3.5415
	32	5.8997	4.1394	142	4.1684	4.9753		38	4.4673	3.9358	126	4.273	4.8163		108	2.4011	1.9541					49	3.1664	3.6277	164	2.005	2.1886
	34	2.0559	3.5438	150	3.5795	3.4663		39	4.2111	3.6758	132	5.0537	5.4713		109	2.1293	2.1667					53	2.6835	3.3211	166	3.1892	3.5747
	35	6.1538	6.3326	152	7.7043	6.3324		41	6.294	5.2994	134	5.0775	4.8057		113	4.3999	4.7698					59	2.61	2.2246	169	2.1198	2.616
	36	3.9095	4.6703	153	7.5015	6.4663		43	4.6095	4.2686	136	7.9318	8.2606		115	2.3617	1.9909					63	3.1636	2.4053	176	2.1337	2.0173
	37	3.7719	4.3478	154	6.4165	5.942		44	5.9336	5.8276	141	8.7116	9.4994		117	2.8281	2.8565					65	3.0457	2.0907	183	2.6439	2.4073
	41	5.4296	5.0049	164	5.2517	6.0316		45	5.7321	5.5385	147	4.2955	5.4359		126	4.2922	3.9117					67	2.0724	2.4345	185	1.5096	2.1285
	45	5.2068	4.8773	165	8.0685	6.7826		46	5.2152	4.8765	151	8.264	5.9782		139	3.9862	3.6741					68	1.7351	2.5109	195	2.6845	2.3912
	48	5.9293	5.2176	196	3.101	2.5019		47	6.6169	5.7433	158	5.9475	5.7301		140	3.9828	4.1508					70	2.9419	2.6727	221	1.8934	2.3847
	54	5.3954	4.8846	198	3.5729	4.1108		49	5.742	6.187	166	5.6057	5.1797		143	3.0411	2.8412					71	1.4753	1.9411	234	4.1794	3.6589
	56	4.683	5.1728	204	4.3021	5.1368		52	5.1807	5.1659	179	6.0411	6.0043		146	1.7389	2.2698					73	2.7382	2.5202	238	1.8675	2.0102
	57	5.5758	5.454	206	3.5075	2.8892		54	6.7567	5.3541	185	4.7772	5.4104		159	4.0699	3.8443					74	1.7525	2.1978	256	2.0253	2.1159
	59	3.3341	3.6449	209	3.4772	4.3562		57	6.748	6.3959	187	7.5554	7.0929		166	4.5933	4.2712					76	1.9475	2.4119	258	1.7346	2.4581
	60	5.4211	6.545	210	3.5521	3.3401		58	5.1042	5.6755	199	7.727	9.128		170	2.4166	3.038					79	1.4247	1.8777	265	1.5793	2.0556
	62	6.9778	5.2628	211	6.9163	6.9797		59	3.8642	3.767	202	4.7642	4.2397		181	3.0949	2.5505					80	2.2505	1.869	278	3.9143	3.4346
	63	4.1586	5.3941	213	5.2932	5.2003		63	5.1222	5.481	205	6.8203	6.9317		186	2.5705	1.8858					81	3.631	3.1892	286	2.4289	2.4993
	65	5.0969	4.0199	216	8.3342	7.5658		64	5.346	6.0161	207	5.1742	4.9937		209	3.225	3.3312					82	2.2466	2.9162	305	2.7739	2.4557
	67	6.4058	6.969	217	4.8836	5.8781		67	5.9021	4.6043	209	3.0476	4.5722		211	2.5135	2.6949					84	3.0357	2.6329	306	1.7768	2.1151
	68	4.2617	5.5423	223	5.3589	5.176		69	7.0587	6.5651	214	4.8955	4.8959		213	2.5404	2.5228					86	4.4457	3.555	316	2.8063	2.7803
	72	6.8825	5.392	225	4.1291	4.4157		71	5.7118	4.8762	221	6.0023	5.6084		221	2.5452	2.2034					87	3.2083	2.2412	318	2.2841	2.2731
	73	3.4453	3.9571	227	3.7153	3.7125		72	5.7428	5.0309	223	4.9071	4.8913		224	3.8896	4.3252					90	2.1084	1.9594	324	2.4012	2.618
	75	6.8144	6.3581	229	3.3633	3.8262		73	5.0392	4.6328	228	5.8705	5.9211		227	2.4544	3.0696					94	2.2557	2.4367	327	3.8178	3.3888
	79	6.6323	5.6467	243	5.4988	4.5615		74	3.5843	2.6015	231	3.3255	3.9996		228	2.688	2.4408					95	3.8597	3.3121	331	2.3174	2.3808
	80	4.7615	5.1654	244	6.3782	4.974		76	4.9871	6.107	244	5.7344	4.9806		233	2.5811	2.498					96	3.0722	3.4125	336	4.8093	4.1427
	81	8.5858	7.1996	266	5.4115	7.0541		77	7.3089	6.5147	259	2.4019	3.2629		240	3.1129	2.6253					100	1.2803	1.8724	345	2.1053	1.9185
	82	8.4632	7.0817	273	5.4061	6.6781		79	6.9135	6.2729	277	2.8115	4.3093		254	1.9528	2.2854					101	2.7052	2.5424	347	2.072	2.4576
	85	3.5912	5.0481	287	6.0452	6.393		80	4.5738	4.3433	287	6.5532	6.7012		256	2.1488	3.1906					105	4.7322	3.438	348	1.9614	2.8407
	87	3.7234	4.4046	288	5.1523	5.4042		81	7.4645	6.9253	293	6.57	5.521		264	1.5753	2.1782					106	3.6638	3.1611	352	1.9857	2.0816
	88	5.8957	4.7879	312	6.0058	5.9784		82	7.4082	6.2749	301	3.3483	3.6015		269	4.3465	3.8235					108	1.8026	1.9426	353	2.7553	2.3819
	89	6.8712	6.2517	321	5.905	5.9284		84	4.614	4.2087	302	4.0561	3.1611		281	1.961	1.9289					109	2.0172	2.0691	367	2.5808	2.1938
	91	4.0713	4.7974	324	4.8682	5.0676		86	5.6103	5.9266	308	3.1621	3.0884		304	3.3812	2.6565					111	2.5605	2.2512	369	3.3215	3.7494
	93	6.9458	7.1981	326	3.382	4.0499		90	4.5735	4.6191	309	4.2948	5.1048		305	3.0354	3.2106					114	2.8237	2.9307	373	2.6097	2.1976
	95	8.9662	8.3891	328	4.7451	5.8681		91	5.5983	4.3543	319	4.9034	5.7751		309	2.3004	2.8749					115	1.9358	1.9834	375	2.3614	2.4485
	96	8.6108	8.4527	332	4.038	4.655		92	4.8	6.0643	323	6.0573	5.8467		319	2.5163	2.2758					117	2.5971	3.0128
	98	6.8476	4.8505	339	4.9517	4.9887		96	9.0064	8.7202	325	5.9705	6.31		357	2.2436	3.2046					118	2.1321	2.2435
	100	3.2111	2.4322	345	3.5229	3.9081		97	4.1863	4.4701	329	3.2848	4.0829		362	3.6447	3.1724					119	1.9916	2.2857
	101	4.1348	4.3154	347	4.9529	4.9839		98	4.9707	4.0095	336	5.5083	4.6881		377	3.3962	3.5139					120	2.8154	3.1089
	102	5.4293	5.5328	352	5.5403	4.5136		103	7.9368	6.7811	337	4.0448	5.0159									121	2.4466	2.6867
	103	7.8775	6.6415	358	4.8103	5.4042		105	8.7444	9.3003	338	5.7049	5.8158									123	1.8258	1.6541
	104	4.3858	4.6699	371	5.5601	5.3969		107	5.2047	5.1343	340	4.8164	5.4835									126	3.5823	4.1863
	105	8.3949	9.0424	372	5.2815	5.2301		108	4.392	5.2166	341	7.2732	6.1806									128	2.0311	1.8401
	107	5.0823	4.3109	375	4.9126	5.4941		110	6.6601	6.4842	352	5.2319	5.2585									129	2.5704	2.2667
	108	4.4432	4.9157	377	5.025	4.9111		111	5.3355	5.2361	355	4.5234	4.6373									131	1.6817	2.5037
	109	3.169	4.6311	378	7.6938	7.9891		115	5.5678	5.9438	359	6.4464	6.1855									132	5.0234	4.3235
	111	5.6224	4.7054					120	6.8154	5.5525	366	4.8552	5.2754									134	2.3602	2.5282
	113	4.4033	5.8055					121	5.638	6.5025												139	4.3542	3.8876
	116	3.7514	4.6659					123	3.3462	4.9442												141	5.1037	4.3681
	120	5.8555	6.7663					124	6.5114	5.7438												142	2.3153	2.2622
	121	5.7224	5.6196					127	4.9918	5.5921												143	3.1113	3.2786
	122	8.0885	7.5544					137	6.7898	5.6735												145	1.5228	1.9231
	124	6.3823	6.5144					139	8.625	6.8534												147	2.4038	2.8404
	125	4.0079	2.9113					142	3.9659	4.3084												148	3.644	3.5387
	128	5.3942	5.7216					144	5.1672	5.3559												149	2.434	2.5763
	130	5.2767	5.4514					145	6.3892	6.8044												150	1.7464	2.2935
	131	4.1449	4.3619					146	1.6758	2.2688												155	2.1222	2.1958
	132	7.3244	8.1234					149	4.0818	4.5006												156	3.3527	2.9374
	136	8.3685	8.6412					153	7.4942	7.3745												159	3.0449	3.1186
	139	6.3894	6.4153					154	5.6241	7.0853												165	3.2356	2.8699
	140	6.1491	6.3813					155	4.9638	5.5709												167	3.7768	3.2786
	144	5.8285	4.6495					156	7.8952	6.3971												171	2.0827	1.7715
	148	6.4159	6.4642					157	5.3513	5.7892												178	2.2045	2.3545
	149	5.036	5.1317					159	5.1949	5.1129												186	2.4221	2.0047
	155	4.7072	4.9817					162	5.426	5.3509												187	3.2848	2.9518
	156	7.7381	6.2873					164	4.9431	5.5212												189	2.283	1.8843
	157	5.1656	5.0376					165	8.6634	7.0501												190	4.9143	4.2848
	158	5.4311	4.7168					168	3.5492	3.8083												193	3.1697	2.2492
	159	7.4015	6.706					170	6.8042	7.0167												199	3.97	3.8903
	160	5.056	5.7727					171	6.9829	6.4714												202	2.2291	2.2206
	161	3.4581	5.7727					172	5.7227	5.5238												203	2.174	2.1632
	162	5.8163	5.5937					173	3.8852	4.3487												205	2.6407	2.7753
	163	7.1072	8.1599					174	4.7887	6.004												206	1.503	1.7646
	166	7.7285	6.988					175	5.0374	5.6801												207	3.117	2.6016
	168	3.3898	4.3116					176	7.2101	7.8214												209	2.7949	1.9563
	169	3.1346	5.0039					178	4.4248	4.2543												212	1.4565	2.2322
	170	6.3687	7.3479					180	6.0231	6.3686												214	1.9747	2.1497
	171	5.8029	5.8369					182	4.6923	5.5361												222	3.4636	3.3698
	172	5.4405	5.3173					183	4.2626	5.5929												223	2.3372	2.4154
	173	4.1225	3.5735					184	6.9728	6.8677												224	3.0566	4.0435
	174	4.0648	4.7302					188	5.7959	5.5534												226	2.3105	2.7825
	177	3.1075	4.334					190	6.8474	5.7619												231	2.6933	2.4011
	180	5.8323	5.6874					191	5.7393	5.7778												232	2.89	2.6978
	182	4.7579	5.3967					193	4.2399	3.6487												236	4.0428	3.3188
	183	4.4512	4.738					194	5.0707	5.0564												237	2.2702	3.0742
	188	4.75	5.1398					195	5.7753	5.0799												239	1.7155	2.444
	191	5.3217	4.3178					197	5.2369	5.6906												242	3.0067	3.2195
	192	3.6439	5.0459					200	3.4705	4.1508												243	1.5322	2.1859
	193	3.673	4.3704					211	7.4946	6.9539												244	3.3742	3.1693
	197	5.2116	5.3985					212	5.0032	5.8596												246	2.1106	2.2092
	200	5.6027	6.1127					213	5.3389	6.1882												248	2.2896	2.4315
	202	4.6361	5.1448					217	5.1132	5.9764												249	1.9928	2.5071
	203	3.2212	3.4165					218	5.9388	5.6897												251	2.7055	2.2781
	207	4.948	4.2809					219	3.3513	4.4005												254	1.5963	2.3223
	208	4.1106	4.8333					225	4.9713	5.8714												257	2.27	2.3155
	212	4.8942	5.8464					226	3.1033	4.5472												262	2.3903	2.4803
	214	6.1385	5.0757					232	3.4298	2.7943												264	1.5191	1.8939
	215	4.6795	4.9698					234	7.4013	6.4765												268	2.5887	1.8414
	221	5.8706	6.3394					235	5.5087	4.6776												269	3.8516	3.2763
	228	5.1809	5.4607					236	5.1202	4.5228												270	1.93	2.3793
	230	6.922	5.7447					237	6.9823	6.1972												272	1.5395	1.5799
	231	3.5702	3.7125					239	3.7965	3.9905												273	1.994	2.5385
	236	3.9037	4.439					242	6.1548	4.9269												274	2.175	2.2397
	238	4.9982	5.5844					245	8.4775	8.2138												281	2.4683	2.4175
	240	4.5625	4.9573					246	3.7718	4.7261												282	2.838	2.1388
	242	6.0478	5.2062					247	4.4134	5.4759												284	2.344	2.2693
	245	7.8846	8.3084					248	3.4458	4.4264												289	3.0093	3.3645
	246	4.0819	4.655					249	6.2128	6.3272												291	1.8755	1.9992
	247	3.9053	5.8909					251	5.4944	4.2994												292	3.5353	3.3338
	250	7.7346	7.2046					255	1.0126	2.5264												294	1.6844	1.7357
	253	5.077	4.6995					257	3.8228	4.6635												295	1.4691	1.6492
	256	4.0785	4.4646					261	7.465	5.8674												298	2.1208	1.9416
	257	3.0147	3.3682					262	4.4184	5.5692												299	3.3771	2.7166
	258	4.0408	4.8356					263	1.4462	3.0979												300	2.3879	2.7635
	261	7.208	5.1622					265	4.5739	4.6733												302	2.6512	2.4775
	262	4.6	5.6348					266	6.0024	6.6991												303	2.0604	2.3339
	267	9.235	8.0868					268	6.6433	5.1776												304	2.4744	1.9353
	268	6.0152	5.0731					270	4.7014	5.2573												307	3.7079	2.8173
	270	4.8313	4.6816					272	5.0017	5.0494												309	2.8316	2.6902
	272	5.3782	4.7667					273	5.4869	6.4525												310	1.8834	2.5706
	274	2.7202	3.1323					275	4.7177	4.3625												313	1.572	2.1039
	275	5.7449	4.4556					278	5.5281	3.9723												322	2.0435	1.7233
	276	5.9327	4.5903					279	4.024	5.2226												325	2.4989	2.618
	277	3.5326	4.4642					280	6.0711	5.4939												329	2.0101	2.0715
	280	5.7334	6.5059					282	4.2014	5.0014												330	1.6671	1.7151
	282	3.818	4.5281					283	5.4209	5.4513												337	1.9834	1.5032
	284	4.4738	5.1016					284	4.439	4.2486												338	1.7049	1.1911
	285	3.217	3.1841					285	3.2403	4.1733												339	1.963	2.7854
	286	5.5838	6.6434					288	5.969	5.9906												341	2.7491	2.1862
	289	8.8144	8.584					291	5.3162	4.682												342	2.5497	2.5758
	290	5.0173	5.4709					292	6.3206	6.4343												346	2.0952	2.2388
	291	5.1701	5.4102					294	3.1231	4.2346												351	1.8538	2.49
	292	7.7533	8.1147					295	4.8916	5.5054												355	1.6146	1.7937
	296	4.6619	5.296					296	6.7199	5.4899												356	2.4475	2.6239
	298	5.2423	5.0877					297	4.5127	6.0324												358	1.7124	2.3924
	302	3.9428	4.5475					299	3.6447	3.9103												359	2.6327	3.3612
	303	4.168	5.0318					303	4.7482	4.386												363	2.5407	2.7781
	304	4.4336	4.6879					304	6.0953	4.4437												365	3.8272	4.3897
	311	5.2469	4.8344					306	4.3298	4.2024												366	2.9081	2.9451
	313	3.3974	3.1633					307	4.7524	4.5478												370	2.7574	3.0578
	314	7.3927	5.351					310	4.3831	5.7056												371	2.7577	2.6955
	315	5.8148	5.2941					311	5.2805	5.1367
	316	8.5536	6.6912					312	6.3606	6.9042
	317	6.1349	6.7188					314	7.7962	6.1279
	320	4.8165	4.8403					316	8.3832	6.3404
	322	3.9097	4.122					320	4.2934	4.5855
	323	6.5696	6.4096					324	5.6711	6.31
	325	3.8563	5.0676					328	5.5204	5.9693
	327	8.0277	6.8591					330	4.3428	4.8091
	329	3.6344	5.0413					332	4.3775	4.7261
	331	5.2632	4.1735					333	7.3435	6.1311
	335	4.8037	6.1419					334	5.1673	5.7903
	337	4.4149	4.3449					339	4.9652	5.7145
	338	6.2608	5.3242					342	3.2032	4.0253
	340	4.9674	5.8167					345	3.6711	3.3691
	341	6.9194	5.6172					346	4.8297	4.1742
	342	2.8858	4.5793					350	3.1365	4.1133
	343	9.7768	8.4526					351	7.9522	8.1641
	344	3.9549	4.4457					353	3.9226	5.2638
	348	8.2847	6.2239					354	5.0667	5.8342
	349	5.0836	5.1197					356	5.3505	5.6783
	350	3.6751	4.1146					358	4.4931	4.9844
	351	6.8671	7.5678					360	6.5519	5.19
	353	4.0501	4.4879					361	5.5867	6.142
	354	4.8128	5.3814					364	3.7869	4.2055
	355	4.448	4.6067					367	5.4047	5.1309
	357	6.9642	6.1699					369	5.4257	5.544
	360	5.4373	4.687					370	5.35	3.8432
	363	6.262	6.5555					372	4.8836	4.1523
	364	3.8382	5.0273					374	3.605	4.2999
	366	4.6131	3.9499					375	5.1922	5.7654
	367	6.0689	5.8409					376	7.1142	6.9801
	369	7.6651	8.1928					378	8.5067	8.4227
	373	3.2856	3.3727
	374	2.5929	4.3467

## Sheet: S3
Table S2. Experimental and predicted endpoint values of each compounds in the four acceptable iQTTR models
	Rat-C.virginianus							C.virginianus-Rat							C.virginianus-O.mykiss							O.mykiss-D.magna
	Training set			Test set				Training set			Test set				Training set			Test set				Training set			Test set
	ID	Exp. endpoint	Pred. by model eq.	ID	Exp. endpoint	Pred. by model eq.		ID	Exp. endpoint	Pred. by model eq.	ID	Exp. endpoint	Pred. by model eq.		ID	Exp. endpoint	Pred. by model eq.	ID	Exp. endpoint	Pred. by model eq.		ID	Exp. endpoint	Pred. by model eq.	ID	Exp. endpoint	Pred. by model eq.
	3	2.1709	2.0207	86	4.4457	4.4361		3	2.0673	2.4848	8	2.7681	3.0595		3	2.0673	2.2156	16	2.7586	3.0877		2	6.4648	6.0757	5	3.7691	4.2266
	8	2.7704	2.5634	97	2.4564	2.9666		11	2.1462	2.8722	99	1.9689	2.0246		8	2.7681	2.2082	31	4.9783	3.8436		3	5.3045	4.9874	12	4.241	4.2873
	11	2.575	2.0818	106	3.6638	4.1245		25	1.9665	2.2171	108	2.4011	2.1318		11	2.1462	3.1717	111	2.0602	2.5796		8	2.9752	4.2725	24	5.314	4.5442
	25	1.8916	1.9427	111	2.5605	2.0153		35	3.0462	3.2673	109	2.1293	2.3375		17	2.2207	2.7659	119	2.1433	2.7706		9	5.1866	4.8417	59	3.8642	3.7498
	35	2.9872	2.7787	131	1.6817	2.1775		40	3.6187	3.1506	126	4.2922	3.8377		20	2.5744	2.7758	126	4.2922	3.4889		11	5.6567	5.1298	71	5.7118	5.7843
	40	2.8654	3.2219	221	1.8934	2.3908		43	2.4484	2.8065	131	2.2698	2.0158		21	2.7656	1.9269	139	3.9862	3.9493		13	5.4825	5.5863	80	4.5738	4.9138
	43	2.5064	2.3158	224	3.0566	3.4317		45	2.3535	2.5509	139	3.9862	4.5777		25	1.9665	2.7121	170	2.4166	2.7424		15	4.8172	5.7016	82	7.4082	7.932
	45	2.2398	2.2423	256	2.0253	2.0838		46	4.07	3.9953	143	3.0411	3.3862		43	2.4484	2.6985	209	3.225	3.1021		16	5.8378	5.3315	95	8.7473	8.3422
	46	3.7467	3.5714	309	2.8316	2.2012		59	2.0647	2.9057	146	1.7389	1.9647		45	2.3535	2.5636	213	2.5404	2.9723		17	3.011	3.9918	97	4.1863	4.3337
	59	2.61	2.0187	370	2.7574	3.564		86	5.1868	4.6654	304	3.3812	2.7758		46	4.07	4.416	309	2.3004	2.9527		20	6.6069	5.6942	103	7.9368	7.4545
	99	1.6908	1.9446					97	3.2889	2.7585					59	2.0647	1.9408					21	7.1259	7.5685	108	4.392	4.6542
	108	1.8026	2.2792					106	4.7844	3.9159					72	4.6425	4.0172					25	5.1917	4.9575	115	5.5678	5.1082
	109	2.0172	2.0687					111	2.0602	2.8583					86	5.1868	4.4986					29	5.3784	5.0126	121	5.638	5.6972
	115	1.9358	2.2487					115	2.3617	2.2594					97	3.2889	2.9911					31	4.4257	5.4793	142	3.9659	4.4301
	117	2.5971	2.6098					117	2.8281	2.8934					108	2.4011	2.1845					32	3.7236	5.8542	144	5.1672	5.7838
	119	1.9916	2.0796					119	2.1433	2.313					109	2.1293	2.2046					36	4.8252	4.2426	155	4.9638	4.8695
	126	3.5823	3.7434					132	3.8473	5.2192					115	2.3617	2.2477					39	4.2111	4.3392	157	5.3513	5.2433
	132	5.0234	3.399					159	4.0699	3.3226					132	3.8473	3.6866					41	6.294	5.4735	162	5.426	5.7738
	139	4.3542	3.5065					166	4.5933	3.461					146	1.7389	1.9267					45	5.7321	5.2931	168	3.5492	3.7953
	143	3.1113	2.7747					186	2.5705	2.7256					159	4.0699	3.868					46	5.2152	6.6507	170	6.8042	6.2242
	146	1.6284	1.7664					209	3.225	3.083					166	4.5933	4.376					48	6.2324	5.8781	171	6.9829	5.7629
	159	3.0449	3.5713					221	2.5452	2.2189					173	2.286	2.8333					53	9.4475	8.7529	180	6.0231	5.7869
	166	3.1892	3.9765					224	3.8896	3.3339					211	2.5135	3.1347					54	6.7567	5.4458	191	5.7393	5.3706
	186	2.4221	2.4103					254	1.9528	1.934					221	2.5452	2.5894					57	6.748	5.5919	211	7.4946	6.6707
	209	2.7949	2.9171					256	2.1488	2.3453					228	2.688	2.5809					62	6.9266	6.7272	228	5.8705	5.2557
	254	1.5963	1.9321					264	1.5753	1.86					272	2.8348	3.6895					63	5.1222	4.4443	242	6.1548	5.9626
	264	1.5191	1.6397					269	4.3465	4.096					275	4.3994	3.6631					65	3.9355	5.2041	272	5.0017	5.4166
	269	3.8516	3.7855					272	2.8348	1.8796					304	3.3812	2.8038					67	5.9021	6.264	275	4.7177	5.7156
	272	1.5395	2.615					281	1.961	2.7699					319	2.5163	1.8333					68	4.6908	4.5277	284	4.439	4.6792
	281	2.4683	1.9384					305	3.0354	3.0629					350	1.8448	1.6613					72	5.7428	6.65	292	6.3206	7.3532
	304	2.4744	3.0381					309	2.3004	3.1181					360	1.7052	2.3157					73	5.0392	3.8667	296	6.7199	4.8326
	305	2.7739	2.7703					370	4.0604	3.0471					370	4.0604	3.9789					79	6.9135	6.4474	325	5.9705	4.1757
																						81	7.4645	8.0293	329	3.2848	3.9947
																						90	4.5735	4.2778	340	4.8164	5.0816
																						91	5.5983	4.3735	350	3.1365	4.0279
																						94	3.5117	4.1943	352	5.2319	5.5488
																						96	9.0064	8.0495	354	5.0667	4.9556
																						98	4.9707	6.6217	360	6.5519	5.4648
																						101	6.0062	4.425	372	4.8836	5.3378
																						105	8.7444	7.8747	375	5.1922	5.0369
																						107	5.2047	5.1923	378	8.5067	7.3047
																						109	3.169	3.6429	213	5.3389	5.3473
																						111	5.3355	5.6296
																						114	6.1972	6.0741
																						120	6.8154	5.8184
																						122	7.0244	7.6266
																						124	6.5114	6.245
																						125	3.5747	4.3223
																						132	5.0537	7.0079
																						136	7.9318	7.8533
																						137	6.7898	6.0372
																						139	8.625	6.2507
																						149	4.0818	5.1548
																						153	7.4942	7.1512
																						154	5.6241	6.2727
																						156	7.8952	7.3428
																						158	5.9475	5.4747
																						159	5.1949	7.0702
																						164	4.9431	5.3294
																						165	8.6634	7.6104
																						166	5.6057	7.3351
																						172	5.7227	5.4823
																						173	3.8852	4.4151
																						174	4.7887	4.3683
																						182	4.6923	4.9296
																						183	4.2626	4.6812
																						188	5.7959	4.9232
																						193	4.2399	4.0511
																						197	5.2369	5.297
																						200	3.4705	5.6136
																						202	4.7642	4.831
																						207	5.1742	5.0835
																						209	3.0476	3.8925
																						212	5.0032	5.04
																						214	4.8955	6.0476
																						217	5.1132	5.0314
																						221	6.0023	5.8306
																						223	4.9071	5.4163
																						225	4.9713	4.4204
																						231	3.3255	3.9678
																						236	5.1202	4.2378
																						244	5.7344	6.2417
																						245	8.4775	7.4614
																						246	3.7718	4.3822
																						247	4.4134	4.2392
																						257	3.8228	3.518
																						261	7.465	6.9136
																						262	4.4184	4.8017
																						266	6.0024	5.4589
																						268	6.6433	5.9477
																						270	4.7014	4.989
																						273	5.4869	5.4545
																						277	2.8115	3.9374
																						280	6.0711	5.7195
																						282	4.2014	4.1685
																						285	3.2403	3.6818
																						287	6.5532	5.972
																						288	5.969	5.2489
																						291	5.3162	5.2633
																						296	6.7199	4.8519
																						302	4.0561	4.2695
																						303	4.7482	4.4519
																						304	6.0953	4.667
																						311	5.2805	5.3256
																						312	6.3606	5.9401
																						314	7.7962	7.0632
																						316	8.3832	8.0032
																						320	4.2934	4.977
																						323	6.0573	6.3966
																						324	5.6711	5.0189
																						328	5.5204	4.9192
																						332	4.3775	4.3466
																						337	4.0448	4.6518
																						338	5.7049	6.1466
																						339	4.9652	5.0865
																						341	7.2732	6.6799
																						342	3.2032	3.4136
																						345	3.6711	3.9295
																						351	7.9522	6.6376
																						353	3.9226	4.3564
																						355	4.5234	4.6787
																						358	4.4931	4.972
																						364	3.7869	4.1849
																						366	4.8552	4.8123
																						367	5.4047	5.9912
																						369	5.4257	7.2837

## Sheet: S4
	C.virginianus				O.mykiss				D.magna				Rat
	True external set				True external set				True external set				True external set
	ID	Pred. by model eq.	HAT i/i (h*=0.3288)		ID	Pred. by model eq.	HAT i/i (h*=0.1746)		ID	Pred. by model eq.	HAT i/i (h*=0.1728)		ID	Pred. by model eq.	HAT i/i (h*=0.1587)
	1	2.8979	0.214		4	5.4739	0.0417		1	5.0956	0.0297		2	2.2382	0.0724
	2	1.3589	0.1527		6	6.5923	0.483		4	5.7936	0.0258		4	2.6981	0.0363
	5	2.9467	0.0871		7	2.4305	0.0802		6	7.0141	0.2911		6	3.3707	0.8037
	6	3.0919	2.9257		10	5.4178	0.0244		18	4.6236	0.0363		7	2.1573	0.1061
	9	2.8544	0.1339		14	4.3274	0.025		23	4.0679	0.0343		14	1.9651	0.0518
	10	2.6823	0.4608		19	6.2428	0.0342		26	5.1146	0.1882		16	2.4955	0.0295
	12	2.2695	0.1631		22	5.5038	0.0343		28	3.9985	0.0272		17	1.3247	0.1737
	13	2.5616	0.1103		23	4.2932	0.0346		30	4.94	0.2479		19	2.7922	0.0291
	14	1.8954	0.0781		27	6.3878	0.1469		33	3.6943	0.0943		20	2.2397	0.0445
	15	1.8672	1.0328		28	4.7598	0.0211		38	4.5288	0.0204		21	2.2438	0.0754
	18	2.4864	0.0987		30	3.5769	1.073		40	6.2481	0.0241		22	2.3388	0.0884
	19	2.6684	0.1245		34	3.848	0.0369		42	5.4257	0.0988		23	2.2799	0.0447
	22	2.0059	0.9918		35	5.8539	0.2107		43	4.3074	0.0188		27	2.0511	0.2013
	24	2.65	0.1111		37	3.3083	0.0936		44	5.5131	0.0324		28	2.6997	0.0412
	26	2.9129	0.1403		40	5.3921	0.0261		47	5.7827	0.0533		29	2.7617	0.043
	27	0.8366	3.6374		42	5.3017	0.2493		49	8.2821	0.1683		30	2.2361	0.4546
	29	2.1922	0.0725		50	6.1014	0.1243		50	8.1281	0.2246		31	3.3552	0.0483
	32	3.9022	0.1247		51	6.5818	0.067		52	5.0186	0.0411		34	2.709	0.0595
	33	1.7304	0.1568		55	5.4425	0.033		58	4.7242	0.0551		37	2.0844	0.1472
	34	1.403	0.1704		56	6.066	0.0718		64	5.0786	0.0385		38	2.4087	0.0296
	36	3.5016	0.2061		60	6.2731	0.0848		66	4.1998	0.0487		39	2.2813	0.0533
	38	4.0598	0.1581		61	9.8298	0.3979		69	5.8253	0.0564		42	1.8846	0.3114
	39	2.3231	0.1285		66	3.7837	0.0805		70	4.6405	0.0336		44	2.935	0.0312
	41	3.2631	0.3323		75	7.3258	0.0447		74	3.0693	0.0665		50	1.2461	0.6249
	44	2.9087	0.0471		78	4.5272	0.0214		76	5.9903	0.0442		51	2.0043	0.1348
	47	2.7812	0.2126		83	4.5083	0.0338		77	6.771	0.3291		52	2.8502	0.0407
	48	3.3844	0.3523		85	4.2858	0.1718		78	3.2417	0.0841		54	3.0661	0.0327
	49	3.8942	0.2821		87	4.3056	0.0469		83	4.5537	0.0347		55	2.0574	0.1411
	50	-0.2032	10.5286		88	5.4239	0.0304		84	4.3748	0.0218		56	3.1395	0.0436
	52	2.6282	0.0647		89	6.0776	0.1662		86	6.9213	0.0642		57	2.1948	0.1054
	53	2.4434	0.0643		93	6.5455	0.481		92	6.6803	0.0643		58	2.0535	0.0947
	54	2.8284	0.1034		99	3.3716	0.1713		99	3.8134	0.075		60	2.5189	0.3358
	55	4.7617	0.4418		100	3.8037	0.0464		106	6.5781	0.0835		61	2.1391	0.1419
	56	3.0051	0.0771		102	4.7456	0.0583		110	5.9845	0.0227		62	2.5358	0.0518
	57	2.4355	0.1011		104	4.9828	0.0647		112	3.6908	0.0838		66	2.6678	0.0614
	58	3.0397	0.1338		106	5.4668	0.0364		117	7.8482	0.0525		69	3.3513	0.0342
	60	2.6845	0.0901		112	4.9677	0.0286		118	4.5292	0.0276		72	2.7183	0.0285
	62	3.6782	1.1245		113	3.4594	0.0796		119	4.7676	0.0195		75	2.5426	0.0624
	63	2.3687	0.1546		116	6.2454	0.0762		123	5.9836	0.0312		78	2.5423	0.0409
	64	2.5022	0.1341		117	8.8512	0.6959		126	6.2253	0.2214		83	2.7591	0.0527
	65	2.0836	0.0816		128	4.8503	0.066		127	5.9218	0.1528		85	2.5011	0.0236
	67	3.4659	0.0909		129	5.8824	0.1524		129	6.2526	0.0545		88	2.6909	0.0391
	68	2.9041	0.0806		130	6.2165	0.0831		134	5.3854	0.0251		89	2.3816	0.3268
	69	1.8685	0.2091		131	4.914	0.0477		135	5.25	0.031		91	1.9336	0.0516
	70	3.3799	0.1014		133	6.7734	0.0773		141	9.6572	0.317		92	3.1329	0.035
	71	3.8889	0.2018		135	3.2501	0.4138		143	5.8981	0.0407		93	3.3341	0.7589
	73	3.0677	0.0739		138	6.4749	0.0373		145	5.3781	0.0309		98	1.8645	0.0683
	74	2.1909	0.551		140	7.1405	0.0832		146	3.2463	0.0636		102	3.0949	0.065
	76	2.8061	0.0434		143	6.7822	0.091		147	6.2868	0.0681		112	2.685	0.0486
	77	2.1831	0.0774		148	4.8465	0.0208		151	6.6228	0.0353		113	2.5312	0.073
	79	1.9763	0.0981		150	4.2269	0.0461		167	5.8981	0.0407		116	2.0859	0.0855
	80	3.2701	0.088		152	6.1398	0.0264		175	4.9989	0.0498		122	3.4546	0.1456
	81	3.8701	0.1086		160	6.4708	0.0335		176	6.5179	0.0582		124	3.3776	0.0519
	82	4.3865	0.2152		161	6.4708	0.0335		178	4.9102	0.0128		127	3.4109	0.1083
	84	4.1609	0.1716		163	8.6987	0.1682		179	5.4373	0.0464		130	3.0694	0.0461
	85	3.7999	0.2808		167	6.7822	0.091		181	3.7519	0.0409		133	3.0217	0.0237
	87	3.3837	0.2242		169	5.3737	0.0242		184	5.7103	0.0539		135	2.3722	0.1272
	88	3.0582	0.0882		177	5.3674	0.029		185	5.3588	0.059		136	3.4717	0.0286
	89	2.1476	0.2045		181	4.7898	0.0376		186	4.3891	0.0341		138	2.0518	0.0479
	90	1.7732	0.6793		186	4.9884	0.0575		187	6.5487	0.0604		140	3.8053	0.1014
	91	1.9291	0.3666		189	6.4992	0.0522		189	6.8499	0.0416		144	2.4496	0.0719
	92	2.9309	0.1064		192	5.4457	0.0722		190	8.0336	0.1273		151	3.2903	0.0517
	94	3.7186	0.4313		196	3.1177	0.1494		194	4.8724	0.0228		152	2.9718	0.0224
	95	2.6928	0.055		198	6.1631	0.0347		195	4.7334	0.0348		153	2.4388	0.0483
	96	3.0625	0.0796		201	6.0818	0.0684		199	7.5679	0.0794		154	2.3735	0.0984
	98	2.4436	0.137		203	4.467	0.0586		201	7.3314	0.0715		157	2.7463	0.0506
	100	3.7957	0.5286		204	6.4394	0.04		205	6.6776	0.0985		158	2.0873	0.0817
	101	2.9947	0.1737		206	3.8564	0.0511		218	4.2272	0.0691		161	2.7068	0.0238
	102	3.1993	0.3763		208	4.3933	0.3472		219	5.0711	0.0472		162	2.8258	0.051
	103	2.6976	0.1705		210	5.124	0.033		220	8.1932	0.0877		168	1.9111	0.0489
	104	1.3815	1.8411		215	3.6757	0.1313		222	4.8446	0.0308		170	1.3954	0.1551
	105	2.5285	0.0546		216	4.9848	0.0304		224	6.927	0.1797		172	2.0802	0.0361
	107	1.6204	0.1967		220	8.7833	0.1485		226	3.215	0.0804		173	2.3422	0.0519
	110	2.7044	0.2285		222	7.0549	0.1303		232	4.3071	0.0241		174	2.214	0.1056
	116	2.7953	0.0773		224	5.2698	0.0314		233	5.2312	0.0393		175	2.4551	0.073
	118	2.7699	0.1969		227	4.0035	0.0288		234	7.3807	0.1159		177	1.8803	0.0862
	120	2.6047	0.1656		229	5.2608	0.0467		235	4.8637	0.0191		179	1.6138	0.14
	121	3.2879	0.0829		230	6.6733	0.0503		237	6.2174	0.0221		180	2.6902	0.0829
	122	2.1758	0.1366		233	6.5522	0.0445		239	4.3517	0.0204		181	2.4555	0.074
	123	2.6523	0.4774		238	5.4654	0.0185		241	7.1194	0.2795		182	2.9626	0.0288
	124	3.5102	0.5409		240	4.1473	0.3023		248	4.118	0.0274		184	2.8381	0.1245
	125	2.6555	0.1068		241	6.8099	0.3667		249	6.2407	0.0569		188	1.8425	0.1032
	127	2.6545	0.0741		243	4.0333	0.0388		251	4.0358	0.026		191	2.5753	0.0752
	128	3.4081	0.1588		250	6.0045	0.6806		252	6.8853	0.2703		192	2.4832	0.0917
	130	2.0996	0.1076		252	6.8403	0.3651		254	4.7704	0.1513		194	1.6436	0.0831
	133	2.3728	0.1544		253	5.0422	0.0594		255	4.2366	0.0434		196	2.2176	0.2934
	134	3.6736	0.2121		254	2.803	0.109		259	3.768	0.0358		197	2.452	0.0413
	135	4.3956	0.4506		256	5.0196	0.0566		260	5.3134	0.045		198	2.5761	0.0456
	136	3.5394	0.0833		258	5.0079	0.0173		263	3.5638	0.0326		200	2.0676	0.1861
	137	2.8643	0.2314		260	4.931	0.1241		264	3.2895	0.045		201	1.5499	0.1914
	138	2.8869	0.4522		264	3.9788	0.0565		265	4.8103	0.0205		204	2.1903	0.1415
	141	2.1586	0.0614		267	7.3421	0.1525		269	4.1435	0.2169		208	1.9174	0.07
	142	2.3174	0.1238		269	3.9941	0.0311		271	5.169	0.0419		210	1.8629	0.0415
	144	2.9481	0.1288		271	3.3016	0.592		278	5.0053	0.118		211	2.7906	0.0631
	145	3.4667	0.1835		274	4.3059	0.0236		279	4.7361	0.0277		213	2.5214	0.057
	147	4.4544	0.195		276	6.4329	0.0625		281	5.0853	0.0229		215	2.1239	0.0493
	148	3.1447	0.2151		281	5.6144	0.0345		283	7.0502	0.1013		216	2.9189	0.0485
	149	4.3792	0.4754		286	7.5248	0.1634		293	6.8747	0.0839		217	2.666	0.0709
	150	2.9104	0.2437		289	8.5469	0.1524		294	3.9145	0.0384		218	2.8991	0.0243
	151	3.2024	0.1035		290	3.9277	0.0315		295	3.3996	0.1088		219	2.4686	0.039
	152	2.4119	0.1555		298	5.7825	0.0286		297	5.8455	0.0917		220	3.3786	0.0289
	153	2.7479	0.1341		300	5.0518	0.041		299	4.6614	0.0219		225	2.2812	0.0771
	154	3.0383	0.0678		305	5.1769	0.0268		300	6.2562	0.0836		227	2.7202	0.0334
	155	2.6104	0.0689		313	5.0652	0.0177		301	5.0468	0.0202		228	2.3251	0.034
	156	3.0214	0.0825		315	7.0229	0.0279		305	4.4473	0.0463		229	2.1862	0.5094
	157	2.4647	0.1234		317	6.7932	0.0877		306	4.6715	0.0185		230	2.0296	0.1165
	158	2.0858	0.6522		318	6.3266	0.0479		307	4.7308	0.0197		233	2.7959	0.0384
	160	3.2363	0.0443		321	6.2859	0.0442		308	2.4135	0.1132		235	2.6482	0.0401
	161	3.2363	0.0443		322	5.0502	0.041		309	4.3614	0.0317		240	3.1579	0.1152
	162	3.9467	0.1968		326	3.5619	0.2441		310	5.147	0.0315		241	3.0595	0.8643
	163	3.1171	0.0716		327	5.977	0.0403		318	6.2512	0.0498		245	3.1427	0.0483
	164	3.1415	0.1239		331	4.3718	0.0409		319	5.5185	0.0348		247	3.5101	0.0265
	165	3.4966	0.0808		335	4.4887	0.0656		330	4.16	0.0412		250	2.4054	0.3852
	167	2.842	0.0768		343	9.5897	0.3283		333	6.9938	0.0418		252	3.2727	0.7907
	168	3.8118	0.495		344	5.2293	0.0586		334	5.2227	0.0534		253	2.2695	0.0701
	169	1.9824	0.204		347	4.459	0.0471		336	8.1946	0.1687		255	3.2053	0.1135
	171	3.0222	0.2305		348	5.3047	0.0453		346	4.6225	0.0193		259	2.5301	0.0819
	172	2.8326	0.293		349	5.6775	0.0502		356	5.4688	0.0115		260	2.4602	0.038
	174	2.0557	0.0995		357	5.5638	0.1527		359	6.2922	0.0526		261	2.8004	0.0492
	175	2.4129	0.0801		362	6.4275	0.0485		361	7.1364	0.0475		263	2.0612	0.1258
	176	2.7756	0.0999		363	6.1681	0.043		362	5.743	0.0457		266	1.6346	0.1374
	177	2.7943	0.1313		365	11.0906	0.291		365	11.6461	0.2319		267	1.5573	0.1509
	178	2.6928	0.1209		368	5.1235	0.0203		368	4.7163	0.0345		271	2.0937	0.1078
	179	2.1731	0.0991		371	4.125	0.0592		370	4.8585	0.0572		275	3.1902	0.0579
	180	2.7748	0.0603		373	5.1353	0.0286		376	6.1313	0.0388		276	2.2835	0.4918
	182	1.9939	0.0991		377	4.2841	0.3794						277	2.4982	0.1244
	183	2.3924	0.1045										279	2.5807	0.059
	184	2.2407	0.144										280	3.1245	0.032
	185	2.6381	0.1158										283	3.1975	0.0381
	187	2.6118	0.1085										285	2.0446	0.0991
	188	2.4968	0.1114										287	2.6028	0.4005
	189	2.8548	0.2881										288	2.3867	0.1101
	190	3.0696	0.1199										290	2.1296	0.1545
	191	2.768	0.137										293	3.1044	0.0341
	192	2.1747	0.0929										296	2.7062	0.0276
	194	1.441	0.1888										297	2.7261	0.1414
	195	1.9285	0.1021										301	1.9636	0.1094
	196	3.0146	0.4531										308	3.0112	0.1136
	197	2.7303	0.1085										311	2.6036	0.0405
	198	2.1487	0.0868										312	2.3685	0.1468
	199	2.5647	0.0707										314	2.6519	0.1319
	200	1.4106	2.9166										315	2.3954	0.0683
	201	2.6217	0.4911										317	2.6106	0.0641
	202	2.1589	0.2493										319	2.1854	0.1128
	203	1.3815	0.7709										320	1.7022	0.0789
	204	1.7176	0.7078										321	2.9892	0.0378
	205	2.8016	0.3147										323	2.4585	0.0469
	206	2.9422	0.1923										326	2.1366	0.1965
	207	2.7833	0.0687										328	2.0442	0.1104
	208	3.8363	0.3764										332	2.6437	0.0462
	210	2.6016	0.3992										333	2.7244	0.0608
	212	2.5368	0.0688										334	2.4938	0.0537
	214	2.6524	0.0736										335	2.4822	0.1223
	215	3.0452	0.1879										340	2.2545	0.0981
	216	4.1659	0.1332										343	3.2845	0.0388
	217	3.4178	0.1574										344	2.5702	0.1534
	218	3.185	0.1096										349	2.5025	0.0501
	219	1.9117	0.1828										350	2.5759	0.0326
	223	3.2922	0.147										354	2.9384	0.0618
	225	2.9668	0.0575										357	3.4651	0.0653
	226	2.7941	0.0395										360	2.7499	0.0667
	229	2.3653	0.3386										361	3.2526	0.0263
	230	2.5583	0.4737										362	2.2813	0.0994
	231	3.0691	0.0882										364	2.8796	0.0415
	232	3.878	0.1466										368	3.0959	0.0521
	234	4.1069	0.2484										372	1.8933	0.0848
	235	3.844	0.1323										376	1.9191	0.169
	236	3.4163	0.13										377	3.1579	0.1152
	237	3.1499	0.1372										378	3.2269	0.0446
	238	3.2071	0.1757
	239	2.7576	0.0511
	242	3.0632	0.3235
	243	1.4709	1.807
	244	1.2026	0.2051
	245	2.8086	0.0993
	246	3.1284	0.0998
	247	3.5885	0.2506
	248	2.9442	0.1276
	249	1.4504	0.7657
	250	2.8325	1.5751
	251	1.8463	0.4343
	252	2.9533	2.9103
	253	2.221	0.2828
	255	2.9211	0.1868
	257	2.9533	0.2423
	258	3.0322	0.073
	259	3.0055	0.145
	261	2.4796	0.1006
	262	2.2153	0.0577
	263	2.2594	0.1369
	265	2.4092	0.0902
	266	2.6615	0.5357
	267	2.8019	0.5683
	270	2.1503	0.0687
	271	4.8679	0.8619
	273	3.7753	0.1622
	274	2.8229	0.068
	276	1.4755	0.3515
	277	2.6327	0.0875
	278	4.2901	0.2599
	279	2.7026	0.0641
	280	4.0538	0.143
	282	1.6231	0.1688
	283	3.5087	0.159
	284	2.1632	0.2489
	285	1.4791	1.5331
	286	2.662	0.1028
	287	2.5173	0.0648
	288	2.6669	0.1131
	289	3.2016	0.0582
	290	1.5334	2.3568
	291	3.6786	0.402
	292	3.6447	0.1964
	293	4.5934	0.1655
	294	1.6226	0.7752
	295	2.3768	0.0675
	296	2.4246	0.0824
	297	3.0261	0.2198
	298	2.7924	0.4843
	299	3.9781	0.2244
	300	4.7253	0.1837
	301	3.7473	0.5499
	302	3.5934	0.2257
	303	3.529	0.1847
	306	3.3612	0.1884
	307	3.8866	0.1348
	308	1.6864	0.145
	310	3.6706	0.2526
	311	2.4173	0.2296
	312	2.4591	0.1521
	313	3.3624	0.143
	314	3.2058	0.0458
	315	2.4971	0.0942
	316	3.6933	0.1936
	317	1.7822	0.1178
	318	2.3437	1.0648
	320	2.9556	0.0781
	321	2.7951	0.0791
	322	3.2876	0.4152
	323	2.4729	0.1225
	324	2.9846	0.0358
	325	2.9846	0.0358
	326	4.3753	0.4448
	327	3.1524	0.1088
	328	1.9278	0.3222
	329	1.995	0.7194
	330	2.4106	0.5309
	331	3.2968	0.2449
	332	3.1284	0.0998
	333	2.7741	0.7786
	334	3.2087	0.5432
	335	2.82	0.7014
	336	5.1739	0.3733
	338	0.8661	4.0961
	339	2.6264	0.1298
	340	2.968	0.1397
	341	3.5863	0.1196
	342	4.3181	0.3284
	343	2.4759	0.0853
	344	1.9387	0.3066
	345	2.5987	0.1762
	346	3.4929	0.2008
	347	3.6329	0.1943
	348	4.891	0.3295
	349	2.0628	0.1291
	351	2.4372	0.4879
	352	2.1744	0.0819
	353	2.9694	0.192
	354	2.7341	0.1313
	355	3.1942	0.361
	356	2.5906	0.0535
	358	4.9549	1.1131
	359	3.4407	0.3032
	361	4.3159	0.1675
	363	2.8856	0.1006
	364	3.7572	0.1069
	365	2.7397	0.0447
	366	2.7577	0.0739
	367	3.6198	0.3443
	368	3.0526	0.1078
	369	2.5594	1.1766
	371	2.8343	0.5248
	372	3.104	0.7856
	373	2.4897	0.0444
	375	3.9794	0.5708
	376	2.0623	0.1194

## Sheet: S5
	Rat-C.virginianus				C.virginianus-O.mykiss				C.virginianus-Rat				O.mykiss-D.magna
	True external set				True external set				True external set				True external set
	ID	Pred. by model eq.	HAT i/i (h*=0.1429)		ID	Pred. by model eq.	HAT i/i (h*=0.4286)		ID	Pred. by model eq.	HAT i/i (h*=0.1875)		ID	Pred. by model eq.	HAT i/i (h*=0.0476)
	4	2.1363	0.0478		1	2.114	0.1498		1	3.4167	0.0416		7	3.9581	0.0215
	7	1.7505	0.0848		2	1.1262	0.2254		5	3.0246	0.0314		10	6.5754	0.0153
	16	2.556	0.0315		5	2.9458	0.1091		9	2.8838	0.0318		14	3.8757	0.023
	17	2.1395	0.0475		9	3.3879	0.0648		10	2.8296	0.0325		19	4.819	0.0104
	20	2.4133	0.0342		12	2.8347	0.0678		12	2.8494	0.0322		22	7.3386	0.0289
	21	2.5614	0.0315		13	2.9666	0.1279		13	2.4258	0.048		27	7.0881	0.0237
	31	4.2747	0.2267		15	2.7993	0.1782		15	1.6966	0.121		34	2.7415	0.0523
	37	2.0377	0.0552		18	2.0897	0.0753		18	2.6992	0.0356		35	6.0599	0.0101
	51	2.3267	0.0373		24	3.0198	0.0915		24	1.9487	0.0892		37	4.1311	0.0186
	72	4.0146	0.1701		26	2.2072	0.1416		26	2.7214	0.0349		51	6.4785	0.0141
	75	2.2657	0.0401		29	2.4823	0.0563		32	4.2821	0.1234		55	6.0114	0.0097
	78	2.1104	0.0496		32	3.3851	0.1104		33	3.2392	0.0349		56	4.869	0.0101
	112	2.6052	0.0313		33	1.5943	0.1948		36	2.9448	0.0313		60	5.4666	0.0079
	113	3.8268	0.1353		36	2.7818	0.066		41	2.3294	0.0544		61	7.7273	0.0386
	140	3.5039	0.0871		38	3.9386	0.107		47	1.8661	0.0989		75	6.5948	0.0156
	170	2.2912	0.0388		39	2.9172	0.0509		48	1.8061	0.1064		85	3.9848	0.021
	173	2.19	0.0443		41	3.4116	0.3501		49	3.4391	0.0427		87	4.0919	0.0192
	181	2.8164	0.0341		44	2.9739	0.0513		53	2.9762	0.0313		88	5.8509	0.0088
	211	2.3662	0.0358		47	3.2466	0.1652		63	3.4364	0.0425		89	6.6408	0.0162
	213	2.3871	0.035		48	2.6854	0.1015		64	3.2932	0.0366		93	6.7013	0.0171
	227	2.3205	0.0375		49	2.8009	0.0716		65	3.3234	0.0376		100	3.6771	0.0271
	228	2.5013	0.0322		52	2.6419	0.0843		67	2.3904	0.0502		102	5.4733	0.0079
	233	2.4186	0.0341		53	2.3634	0.3753		68	2.0671	0.0767		104	4.6283	0.0121
	240	2.8303	0.0345		54	3.1876	0.1441		69	2.1714	0.0669		113	4.6424	0.012
	275	3.8265	0.1352		57	2.0926	0.1873		70	3.2239	0.0345		116	4.1145	0.0188
	319	2.3684	0.0357		58	2.9264	0.137		71	1.818	0.1048		128	5.4449	0.0079
	350	1.8485	0.0734		62	4.4627	1.1231		73	3.0286	0.0314		130	5.3497	0.008
	357	2.1572	0.0464		63	1.7537	0.0829		74	2.0838	0.0751		131	4.4332	0.0143
	360	1.7404	0.0861		64	3.258	0.098		76	2.2707	0.0587		133	4.618	0.0122
	362	3.2421	0.059		65	2.185	0.0903		77	3.105	0.0321		138	4.7505	0.011
	377	3.0497	0.0445		67	3.2995	0.0967		79	1.7695	0.1111		140	6.0561	0.01
					68	2.7517	0.0689		80	2.5612	0.0408		148	6.2721	0.0118
					69	2.4656	0.2227		81	3.8844	0.0757		150	3.9754	0.0212
					70	3.0761	0.0397		82	2.5573	0.041		152	7.3155	0.0284
					71	3.7929	0.1266		84	3.3138	0.0373		160	5.171	0.0085
					73	2.7669	0.0594		87	3.4792	0.0448		161	3.877	0.023
					74	2.8703	0.1726		90	2.4249	0.0481		163	6.8319	0.0191
					76	3.0619	0.0326		94	2.5661	0.0406		169	3.6151	0.0284
					77	2.1069	0.1677		95	4.1037	0.0998		177	3.5931	0.0289
					79	1.7296	0.1606		96	3.3488	0.0386		192	4.0275	0.0203
					80	2.9695	0.043		100	1.6311	0.1304		196	3.5878	0.029
					81	4.479	0.1759		101	2.997	0.0313		198	3.97	0.0213
					82	5.2358	0.2618		103	3.8644	0.0737		203	3.6852	0.0269
					84	4.1294	0.1221		104	1.8661	0.0989		204	4.5605	0.0128
					90	2.4501	0.0799		105	4.94	0.2401		206	3.917	0.0223
					91	1.6117	0.2028		107	3.0044	0.0313		208	4.4054	0.0147
					92	2.7571	0.0962		110	3.7129	0.0604		210	3.9532	0.0216
					94	2.7715	0.1668		114	3.1106	0.0322		215	4.8661	0.0101
					95	2.6433	0.2663		118	2.4477	0.0467		216	7.8255	0.0413
					96	2.8517	0.2756		120	3.1026	0.0321		227	4.0853	0.0193
					98	2.3075	0.076		121	2.7491	0.0342		229	3.8003	0.0245
					101	3.5073	0.1581		123	2.154	0.0685		230	6.682	0.0168
					103	3.219	0.277		125	2.5723	0.0403		238	5.1242	0.0086
					105	2.7087	0.2594		128	2.3508	0.0529		240	4.7713	0.0108
					107	1.5735	0.1046		129	2.8677	0.0319		243	5.5295	0.008
					110	3.2019	0.2564		134	2.6663	0.0366		250	7.34	0.029
					114	3.4695	0.0614		137	2.5509	0.0413		253	5.188	0.0084
					118	3.0299	0.116		141	5.2961	0.3229		256	4.3794	0.015
					120	2.6887	0.1226		142	2.6232	0.0382		258	4.3489	0.0154
					121	3.5812	0.0782		145	1.8635	0.0992		267	8.555	0.0651
					122	2.3845	0.1441		147	2.7081	0.0353		274	3.2795	0.0365
					123	1.3361	0.2046		148	3.8969	0.0769		276	5.8808	0.009
					124	2.2314	0.1056		149	2.737	0.0345		286	5.5983	0.008
					125	2.4672	0.1603		150	2.0779	0.0756		289	8.2144	0.0532
					127	2.8106	0.0983		155	2.4381	0.0473		290	5.1396	0.0086
					134	3.9547	0.1788		156	3.6177	0.0533		298	5.3218	0.0081
					136	3.5094	0.1635		160	2.4994	0.0439		313	3.8279	0.024
					137	3.3672	0.192		163	3.9258	0.0798		315	5.7854	0.0086
					141	2.5214	0.2591		164	2.3258	0.0546		317	6.0446	0.0099
					142	2.5329	0.0879		165	3.5055	0.0462		321	5.8584	0.0089
					144	2.4058	0.0627		167	4.0242	0.0905		322	4.2427	0.0169
					145	3.8274	0.2109		169	2.4358	0.0474		326	3.8154	0.0242
					147	4.5675	0.2433		171	2.4003	0.0496		327	7.5774	0.0346
					149	4.7431	0.519		176	2.4491	0.0466		331	5.3388	0.008
					151	3.0289	0.2063		178	2.517	0.043		335	4.9667	0.0094
					153	1.9512	0.2118		183	2.9382	0.0313		343	8.9937	0.0824
					154	2.636	0.0607		185	1.8509	0.1007		344	4.2794	0.0163
					155	2.8495	0.0685		187	3.5526	0.049		347	5.0875	0.0088
					156	3.2812	0.1792		189	2.5922	0.0395		348	7.7855	0.0402
					157	2.9033	0.0765		190	5.1146	0.279		349	5.1933	0.0084
					158	2.7662	0.0985		193	3.4423	0.0428		357	6.7161	0.0173
					162	3.5899	0.1659		195	2.9771	0.0313		363	6.1475	0.0107
					164	3.0668	0.064		199	4.2094	0.1134		371	5.5791	0.008
					165	3.4368	0.2039		202	2.5406	0.0418		373	3.7373	0.0258
					168	2.6499	0.1186		203	2.4878	0.0445		374	3.1764	0.0393
					171	3.5205	0.2674		205	2.9352	0.0314		377	5.1459	0.0085
					172	3.2128	0.3007		206	1.8446	0.1015
					174	2.0006	0.1311		207	3.3918	0.0404
					175	2.5418	0.1012		212	1.8	0.1071
					176	3.023	0.1828		214	2.2967	0.0567
					178	2.233	0.1281		216	4.4433	0.1476
					179	1.9152	0.1493		222	3.724	0.0613
					180	2.9875	0.0714		223	2.6442	0.0374
					182	1.8155	0.1185		226	2.6187	0.0384
					183	2.3242	0.1329		231	2.9856	0.0313
					184	2.7319	0.1181		232	3.1741	0.0333
					185	1.9525	0.1287		234	4.4101	0.1424
					187	1.9747	0.2332		235	4.2878	0.1242
					188	2.0015	0.1535		236	4.2792	0.1229
					190	2.7789	0.1033		237	2.58	0.04
					191	3.4667	0.061		238	2.1939	0.065
					193	1.7982	0.112		239	2.0483	0.0786
					194	1.261	0.2079		242	3.286	0.0363
					195	1.9972	0.1327		243	1.8726	0.0981
					197	3.1264	0.1105		244	3.6383	0.0548
					199	2.3579	0.1811		246	2.427	0.0479
					200	2.8513	0.1492		248	2.5986	0.0392
					202	2.5049	0.0794		249	2.3141	0.0554
					205	1.4962	0.2383		251	2.9973	0.0313
					207	3.0129	0.0692		257	2.5798	0.04
					212	2.8356	0.0615		258	2.0665	0.0767
					214	2.3471	0.0858		262	2.6951	0.0357
					217	3.0111	0.1489		265	1.9177	0.0928
					218	3.5452	0.1175		268	2.8853	0.0317
					219	2.1025	0.1256		270	2.2538	0.06
					223	3.36	0.0966		273	2.3152	0.0554
					225	2.6971	0.0473		274	2.4887	0.0444
					226	2.9813	0.0825		278	4.1561	0.1064
					231	2.9911	0.119		282	3.1243	0.0324
					232	4.0428	0.3201		284	2.6507	0.0372
					234	4.7125	0.2606		286	2.7321	0.0346
					235	3.6605	0.0692		289	3.2885	0.0364
					236	3.1296	0.0493		291	2.2017	0.0643
					237	3.6556	0.1642		292	3.7927	0.0671
					239	3.0003	0.0721		294	2.0185	0.0817
					242	3.9722	0.2679		295	1.8121	0.1056
					244	0.8836	0.2562		298	2.4368	0.0474
					245	2.7551	0.2747		299	3.6411	0.055
					246	3.4079	0.1247		300	2.6928	0.0358
					247	4.084	0.2416		302	2.9452	0.0313
					248	3.1715	0.1539		303	2.3789	0.051
					249	1.8648	0.1248		306	2.1071	0.0728
					251	2.4409	0.0903		307	3.9581	0.0832
					255	3.4598	0.4332		310	2.2092	0.0637
					257	3.4027	0.2395		313	1.9107	0.0936
					259	3.4132	0.2782		316	3.0939	0.0319
					261	2.3152	0.1943		318	2.5933	0.0394
					262	2.1845	0.0683		322	2.3627	0.0521
					263	2.7968	0.2734		324	2.7056	0.0354
					265	2.11	0.1175		325	2.7992	0.033
					266	1.4374	0.2191		327	4.0635	0.095
					268	3.1413	0.1902		329	2.3306	0.0543
					270	2.0889	0.0876		330	2.0019	0.0834
					273	4.2767	0.1407		331	2.6252	0.0381
					277	2.9953	0.1634		336	5.0139	0.2561
					278	4.2638	0.2326		337	2.3051	0.0561
					279	2.8553	0.0653		338	2.0381	0.0796
					280	3.782	0.074		339	2.2855	0.0576
					282	1.3868	0.1787		341	3.0391	0.0314
					283	3.2538	0.237		342	2.8479	0.0322
					284	2.5066	0.0814		345	2.422	0.0483
					285	2.581	0.1971		346	2.4122	0.0489
					287	2.3725	0.093		347	2.39	0.0503
					288	2.2485	0.1378		348	2.284	0.0577
					291	2.4854	0.0954		351	2.1809	0.0661
					292	3.7761	0.1955		352	2.3073	0.0559
					293	4.5185	0.1478		353	3.045	0.0315
					294	2.0722	0.1054		355	1.9515	0.0889
					295	2.6183	0.0561		356	2.7499	0.0342
					296	2.3453	0.1413		358	2.0453	0.0789
					297	3.019	0.0757		359	2.9275	0.0314
					299	4.507	0.2595		363	2.8393	0.0323
					301	2.4983	0.156		365	4.0725	0.0961
					302	2.8569	0.0788		366	3.1915	0.0337
					303	2.8316	0.0661		367	2.8777	0.0318
					306	2.7157	0.0668		369	3.5878	0.0513
					307	3.6352	0.0798		371	3.0473	0.0315
					308	1.7094	0.1534		373	2.9055	0.0316
					310	3.9721	0.2602		375	2.6674	0.0366
					311	2.7395	0.0552
					312	2.9287	0.2052
					314	3.4093	0.135
					316	3.9138	0.2865
					320	2.6032	0.0591
					323	2.8464	0.13
					324	3.0913	0.0403
					325	3.0953	0.0468
					328	1.6691	0.1525
					329	2.4364	0.0914
					330	2.1855	0.0823
					332	3.4161	0.1066
					333	3.5043	0.1403
					334	3.4308	0.1093
					336	4.8495	0.5378
					337	2.9287	0.145
					338	2.7516	0.1376
					339	2.9538	0.0549
					340	2.41	0.0904
					341	3.5916	0.164
					342	4.451	0.3833
					345	2.1684	0.1848
					346	2.9405	0.0704
					351	3.0053	0.1904
					352	2.2639	0.1004
					353	3.4468	0.1938
					354	3.0354	0.1483
					355	2.299	0.1179
					356	2.5924	0.0523
					358	3.4429	0.1286
					359	4.035	0.2785
					361	5.0142	0.1906
					364	3.4416	0.1195
					366	2.8895	0.0614
					367	4.2392	0.3333
					369	2.7294	0.0774
					372	1.7522	0.1385
					375	5.0094	0.5273
					376	2.1139	0.2443
					378	2.8691	0.2796

## Sheet: Table S2-C-OStr
Table S2. Descriptor values, experimental and predicted pLD50 values, hat values and standardized residuals of all training, test, and true external compounds of the C-OStr model.
Modeling data set
ID	Status	ATSC1m	MATS2v	GATS8e	SpMax2_Bh(s)	C-002	F02[O-O]	SHssNH	MW	ALOGP	Experimental pLD50	Predicted pLD50	HAT i/i (h*=0.4364)	Std.residuals
3	Test	1.938	-0.13	0	4.715	0	0	0.451991	151.2	1.3753	2.0673	2.4304	0.111	0.7471
7	Test	4.007	-0.041	0	6.448	0	0	0	91.13	-0.7819	1.7183	1.8454	0.0823	0.2574
21	Test	6.172	-0.251	0	4.921	0	0	0	187.07	2.3891	2.7656	2.0487	0.1013	-1.4668
40	Test	10.16	0.236	1.531	4.799	0	0	0	293.45	5.4133	3.6187	3.7099	0.2075	0.1987
46	Test	5.837	0.186	1.606	5.035	0	2	0.595037	223.25	1.4788	4.07	4.5022	0.2189	0.9486
97	Test	7.921	-0.013	1.155	5.077	2	0	0	291.81	2.9175	3.2889	2.6061	0.1322	-1.4219
106	Test	14.889	0.13	1.27	4.892	0	3	0	304.39	3.1366	4.7844	4.6233	0.1852	-0.3463
111	Test	1.043	0.411	0	7.409	0	0	0	197.03	0.8141	2.0602	2.0965	0.2107	0.0792
112	Test	1.726	0.048	0.971	6.351	0	1	0	235.07	3.1894	2.8222	2.608	0.0578	-0.428
119	Test	7.265	0.102	0.133	4.716	0	0	0	191.3	2.4278	2.1433	2.7454	0.0648	1.2076
131	Test	7.359	0.009	0.468	7.43	2	2	0	251.31	2.5637	2.2698	2.327	0.1894	0.1232
132	Test	16.026	0.009	1.201	4.302	0	1	0	274.45	2.9527	3.8473	4.0085	0.1854	0.3464
173	Test	2.902	0	2.124	8.181	1	1	0	291.72	1.5684	2.286	2.4677	0.1858	0.3906
272	Test	10.209	0.079	1.879	7.811	2	3	0	346.41	2.3542	2.8348	3.4352	0.2724	1.3655
275	Test	5.897	0.316	1.768	7.427	0	1	0.621542	219.3	0.2121	4.3994	3.8757	0.1717	-1.1163
350	Test	3.503	-0.138	0	6.999	1	1	0.3859	160.22	0.4009	1.8448	1.9997	0.1597	0.3277
360	Test	2.983	-0.162	0.228	4.719	0	0	0	228.29	3.0986	1.7052	2.1456	0.072	0.8868
370	Test	2.505	0.456	0	6.445	0	3	0	257.44	0.7531	4.0604	3.4252	0.1433	-1.3311
4	Training	6.337	0.054	0.142	4.709	2	0	0	207.32	2.9099	2.2166	2.2579	0.1152	0.0853
8	Training	0.637	-0.009	0.048	6.351	0	1	0	221.04	2.8119	2.7681	2.052	0.0762	-1.4453
11	Training	3.791	0.107	0.305	5.05	0	1	0	263.13	3.7892	2.1462	2.8515	0.044	1.3993
16	Training	3.05	0.23	0	4.711	0	0	0	165.23	1.5812	2.7586	2.6304	0.1091	-0.2637
17	Training	4.599	0.164	0	4.891	0	0	0	126.18	0.3509	2.2207	2.5778	0.0785	0.7217
20	Training	0.689	-0.063	0.092	4.776	2	1	0.50244	281.11	2.2675	2.5744	2.4689	0.2042	-0.2294
25	Training	2.595	0.107	0	4.89	0	0	0	142.59	2.7132	1.9665	2.3765	0.0728	0.8259
31	Training	6.647	0.232	0.935	4.873	0	1	0.601677	190.3	1.1675	4.9783	4.0572	0.1528	-1.9414
35	Training	3.324	0.021	1.061	8.462	0	1	0.720741	527.24	4.6484	3.0462	2.8015	0.168	-0.5204
37	Training	8.693	0.221	0.492	7.413	0	0	0.41487	241.34	0.7644	2.0892	2.8455	0.1254	1.5688
43	Training	6.079	0.036	0.097	4.537	0	0	0.826579	215.72	2.5357	2.4484	3.3364	0.2137	1.9425
45	Training	1.489	0.398	0	7.409	0	0	0	241.48	0.9231	2.3535	2.1034	0.202	-0.5431
51	Training	4.542	0.086	1.099	7.999	2	0	0.410667	398.26	4.1266	2.4624	2.1511	0.1488	-0.6545
59	Training	3.868	0.155	0.038	7.412	1	0	0.470093	261.14	1.4107	2.0647	2.1298	0.1398	0.1363
72	Training	6.796	0.187	1.366	4.921	1	1	0.574629	221.28	2.2344	4.6425	3.9699	0.1559	-1.4199
75	Training	0.036	0.19	1.941	7.999	0	0	0	407.63	5.665	2.3836	2.4193	0.1826	0.0764
78	Training	3.229	-0.03	1.335	6.351	0	1	0	200.63	2.525	2.1831	2.7416	0.0802	1.1295
86	Training	10.161	0.189	0.628	5.095	0	4	0	362.79	3.8934	5.1868	4.4092	0.1271	-1.6144
99	Training	4.881	-0.207	0	4.992	2	0	0.435694	166.22	0.3139	1.9689	2.0363	0.1832	0.1447
108	Training	0.766	-0.09	0	4.985	0	0	0	172.01	3.0377	2.4011	1.9541	0.08	-0.9041
109	Training	3.653	-0.072	0	4.918	0	0	0	208.1	2.003	2.1293	2.1667	0.0599	0.0748
113	Training	2.183	0.517	0	5.1	0	6	0	220.98	0.4737	4.3999	4.7698	0.3494	0.8897
115	Training	0.716	0.072	0	6.999	0	1	0	207.02	2.3066	2.3617	1.9909	0.0885	-0.7536
117	Training	19.998	-0.222	0	5.096	0	0	0	474.6	5.7376	2.8281	2.8565	0.3253	0.067
126	Training	11.371	0.31	0.066	4.974	0	1	0.456912	229.29	0.5657	4.2922	3.9117	0.1586	-0.8047
139	Training	7.482	0.21	0	5.178	0	3	0	406.92	2.1414	3.9862	3.6741	0.0725	-0.6288
140	Training	7.486	0.214	0	6.999	0	6	0	422.92	2.2374	3.9828	4.1508	0.2549	0.3776
143	Training	8.912	-0.051	1.146	6.818	0	1	0	419.93	6.6715	3.0411	2.8412	0.0769	-0.4035
146	Training	3.232	-0.356	0	6.435	0	3	0	144.5	-0.6575	1.7389	2.2698	0.3125	1.2421
159	Training	9.043	0.311	0.182	6.999	0	4	0	277.26	2.6915	4.0699	3.8443	0.1167	-0.4657
166	Training	11.102	0.284	0.354	4.707	0	3	0	278.36	3.3389	4.5933	4.2712	0.1094	-0.6619
170	Training	1.99	0	1.412	8.509	0	2	0.597835	465.11	5.7708	2.4166	3.038	0.1667	1.3205
181	Training	3.34	0.014	1.686	7.999	0	1	0	288.7	1.9789	3.0949	2.5505	0.1142	-1.1221
186	Training	5.245	-0.04	0.929	8.2	0	0	0	301.32	2.7194	2.5705	1.8858	0.1149	-1.4117
209	Training	3.526	0.001	1.942	6.999	0	1	0.479199	255.69	1.7669	3.225	3.3312	0.144	0.2227
211	Training	4.809	0.221	0.839	7.999	1	2	0	527.87	5.8264	2.5135	2.6949	0.0898	0.3688
213	Training	10.751	0.039	0.834	5.077	3	0	0	333.9	4.0142	2.5404	2.5228	0.2431	-0.0394
221	Training	0.358	-0.11	0.729	5.062	0	0	0	289.54	5.116	2.5452	2.2034	0.0893	-0.6948
224	Training	15.094	0.204	2.191	7.427	1	3	0	330.4	1.8946	3.8896	4.3252	0.2731	0.991
227	Training	9.213	0.246	0.977	7.424	0	1	0	279.37	2.3766	2.4544	3.0696	0.0883	1.2497
228	Training	5.029	0.058	1.77	7.999	0	0	0	397.81	4.2406	2.688	2.4408	0.1279	-0.5135
233	Training	9.827	0.107	0.673	5.077	3	0	0	319.87	3.5799	2.5811	2.498	0.2395	-0.1848
240	Training	5.556	-0.29	0	2.277	0	0	0	94.94	0.9911	3.1129	2.6253	0.1653	-1.0354
254	Training	1.344	-0.109	0	3.701	0	0	0	69.08	-0.41	1.9528	2.2854	0.0999	0.6799
256	Training	4.942	-0.076	1.258	4.756	0	0	0.405278	225.28	1.6937	2.1488	3.1906	0.1111	2.1434
264	Training	3.924	0.059	0	4.248	2	0	0	99.15	-0.1649	1.5753	2.1782	0.1331	1.2561
269	Training	10.231	0.272	0.054	7.392	0	3	0.492663	213.22	-0.3334	4.3465	3.8235	0.1642	-1.1098
281	Training	0.154	-0.137	0	4.669	0	0	0	147	3.1588	1.961	1.9289	0.0956	-0.0655
304	Training	5.781	-0.039	0.627	4.763	0	0	0	211.71	2.6276	3.3812	2.6565	0.0533	-1.4449
305	Training	2.482	0.025	1.805	5.044	1	0	0.43916	218.09	2.9461	3.0354	3.2106	0.1783	0.3749
309	Training	7.791	0.16	0.378	5.092	0	0	0	291.81	3.0987	2.3004	2.8749	0.0725	1.1571
319	Training	4.32	0.063	0.806	8.499	0	0	0.478768	464.38	3.1434	2.5163	2.2758	0.1236	-0.4985
357	Training	8.118	0.314	0.501	7.431	0	2	0	354.53	2.1022	2.2436	3.2046	0.0824	1.946
362	Training	9.403	0.097	0.639	5.012	1	0	0.390964	383.91	5.2232	3.6447	3.1724	0.069	-0.9495
377	Training	20.512	-0.355	0	1.846	0	0	0	141.94	1.5224	3.3962	3.5139	0.3772	0.2892
True external set
ID	ATSC1m	MATS2v	GATS8e	SpMax2_Bh(s)	C-002	F02[O-O]	SHssNH	MW	ALOGP	Predicted pLD50	HAT i/i (h*=0.4364)
1	16.5607	-0.24111	0	4.02784	0	0	0	236.33	2.4937	2.8979	0.214
2	2.22454	-0.128174	0	7.44694	0	0	0	134.14	1.3488	1.3589	0.1527
5	8.86933	0.103449	0	4.06881	0	0	0	171.33	1.4094	2.9467	0.0871
6	30.6282	0.0852373	1.06936	7.42534	9	3	0	746.1	4.9172	3.0919	2.9257
9	6.90265	0.00531237	1.07186	5.0501	2	1	0	321.22	4.2607	2.8544	0.1339
10	8.99368	-0.0119807	1.29574	5.05002	4	1	0	333.28	6.012	2.6823	0.4608
12	2.84447	-0.0513509	1.22162	6.35097	2	1	0	249.1	3.1679	2.2695	0.1631
13	4.35704	-0.10797	1.32619	4.89974	1	0	0	218.69	4.2016	2.5616	0.1103
14	3.41346	0.0198314	0	6.46845	0	0	0	136.16	1.3025	1.8954	0.0781
15	9.70841	-0.238457	1.17669	4.22473	6	0	0	190.39	3.4093	1.8672	1.0328
18	3.28279	-0.0979159	0	5.03093	0	0	0.463267	198.43	1.4295	2.4864	0.0987
19	8.80747	0.14157	0.661685	5.07719	2	0	0	317.85	3.3974	2.6684	0.1245
22	7.00094	0.0107351	1.41865	4.92763	6	0	0	282.26	4.543	2.0059	0.9918
24	3.60015	0.250269	0	4.87854	0	0	0	156.62	3.1994	2.65	0.1111
26	8.86521	0.1712	0	7.38317	0	1	0.448971	183.19	-0.2833	2.9129	0.1403
27	13.7898	-0.0557466	0.908918	7.4287	11	1	0	384.56	6.6944	0.8366	3.6374
29	1.3879	0.0623889	0	5.07808	0	0	0	210.3	2.4168	2.1922	0.0725
32	8.54571	0.258901	0.971632	7.43494	0	2	0.620579	222.3	0.1517	3.9022	0.1247
33	2.34189	-0.359435	0	4.66012	0	0	0	58.09	0.2588	1.7304	0.1568
34	2.87955	-0.303303	0	6.40309	0	0	0	110.55	-0.2045	1.403	0.1704
36	8.23786	0.03249	0.162874	4.3474	0	0	0.788925	227.38	2.743	3.5016	0.2061
38	7.14684	0.297775	0.677041	4.8162	0	1	0.574223	208.29	2.242	4.0598	0.1581
39	3.70313	0.104635	0.0580322	5.21858	2	1	0	227.67	1.5056	2.3231	0.1285
41	1.06934	-0.182346	2.32998	4.93777	0	0	0.437731	275.53	4.3922	3.2631	0.3323
44	6.75407	0.13125	0.975964	6.82001	0	1	0	403.42	3.6836	2.9087	0.0471
47	6.24894	0.0786258	1.73592	7.999	2	2	0	335.32	4.4008	2.7812	0.2126
48	8.09722	0.0243513	1.2975	7.42875	2	1	1.06111	290.36	2.9654	3.3844	0.3523
49	20.2378	0.0429586	0.580794	6.999	0	2	0.26793	397.57	3.4993	3.8942	0.2821
50	16.7775	-0.238636	0.975023	4.23832	19	0	0	322.69	10.4196	-0.2032	10.5286
52	5.10102	-0.150442	0.336451	4.7869	0	1	0	212.26	3.2689	2.6282	0.0647
53	5.94846	-0.0103565	0.854463	7.43184	0	1	0	434.31	5.6169	2.4434	0.0643
54	3.76811	-0.00233737	1.26364	4.94404	0	0	0	251.35	2.3965	2.8284	0.1034
55	9.03946	0.0644976	1.76967	4.90525	0	1	1.11375	300.39	3.6794	4.7617	0.4418
56	10.5126	0.0791111	0.58303	5.09257	0	0	0	337.46	4.101	3.0051	0.0771
57	2.48562	0.0947897	1.11404	8.2014	0	0	0.488422	414.23	5.1938	2.4355	0.1011
58	3.47576	-0.130561	1.43583	5.02728	0	0	0.411754	343.22	4.5205	3.0397	0.1338
60	8.28202	-0.0917111	1.22568	6.46668	1	1	0	527.43	6.6328	2.6845	0.0901
62	0.719304	-0.201997	4.73303	6.999	0	1	0	228.05	2.9349	3.6782	1.1245
63	12.4341	-0.0172384	0	6.46813	0	0	0	276.91	2.9383	2.3687	0.1546
64	0.452867	0.0452735	1.2605	5.01187	1	0	0	377.08	3.1816	2.5022	0.1341
65	1.62294	0.0988555	0	6.999	0	1	0	200	0.0568	2.0836	0.0816
67	9.37832	0.202822	1.23549	7.81071	1	2	0.348832	295.38	4.0779	3.4659	0.0909
68	10.2812	0.0383117	0.0811964	4.3244	0	0	0	217.42	3.5135	2.9041	0.0806
69	1.6276	-0.0388906	1.74338	7.40835	2	0	0	349.07	3.5113	1.8685	0.2091
70	4.78008	0.0234571	0.43534	4.93564	0	1	0.575718	201.24	2.502	3.3799	0.1014
71	3.9223	0.0355699	1.5995	5.07242	0	1	0.645278	191.21	1.6508	3.8889	0.2018
73	5.8956	-0.023532	0.612898	4.77564	0	0	0.443727	235.33	1.4139	3.0677	0.0739
74	6.97747	-0.0559502	1.96233	7.42878	4	1	0	252.29	0.3773	2.1909	0.551
76	3.96228	0.150189	0.833358	6.44203	0	1	0	274.71	2.9672	2.8061	0.0434
77	4.59139	0.0486216	0	6.999	0	1	0	164.37	3.288	2.1831	0.0774
79	6.37363	0.016759	0	6.81489	0	0	0	265.9	4.2454	1.9763	0.0981
80	4.80497	0.014877	0.319293	4.94545	0	1	0.524846	213.68	2.9843	3.2701	0.088
81	4.2657	0.215415	0.75176	5.00447	0	3	0	350.6	4.5994	3.8701	0.1086
82	5.18132	0.492951	0.879498	5.02013	0	3	0	322.54	3.9018	4.3865	0.2152
84	6.58694	0.272242	1.06817	4.80161	0	1	0.568552	193.27	3.0522	4.1609	0.1716
85	1.92717	0.204172	1.50323	6.999	0	1	0.996422	249.71	1.3125	3.7999	0.2808
87	5.33375	0.145505	0.229796	5.18441	0	0	0.865642	240.73	2.3359	3.3837	0.2242
88	6.68601	0.329926	0.761327	6.999	0	1	0	324.82	3.0686	3.0582	0.0882
89	1.02093	-0.0331137	1.10823	7.42641	2	0	0.670966	602.13	5.9867	2.1476	0.2045
90	9.74807	-0.0847056	0.0817174	4.31782	5	0	0	215.4	3.337	1.7732	0.6793
91	6.17262	-0.142272	1.32465	8.23915	3	0	0.598031	412.39	4.9877	1.9291	0.3666
92	9.67104	0.224369	1.00474	7.999	0	1	0	447.49	5.1221	2.9309	0.1064
94	4.18889	0.0986592	1.77022	7.41272	0	0	1.26857	198.21	-0.4435	3.7186	0.4313
95	6.82921	-0.0228478	0.991699	6.81771	0	1	0	416.32	5.4114	2.6928	0.055
96	10.9801	0.0457549	1.04895	6.81771	0	1	0	375.5	5.5193	3.0625	0.0796
98	6.86545	-0.128776	0.272939	4.73765	2	0	0.424722	225.32	3.4454	2.4436	0.137
100	5.30714	0.0486851	3.53938	7.42806	2	1	0.547639	160.2	-0.6908	3.7957	0.5286
101	4.29599	0.340408	0	4.2053	0	0	0	162.31	1.6021	2.9947	0.1737
102	17.1429	0.417892	0	6.8163	0	0	0	241.87	0.7031	3.1993	0.3763
103	1.02993	-0.0763953	1.57699	4.94235	0	0	0	354.48	6.3311	2.6976	0.1705
104	8.07721	-0.260872	1.20259	4.22725	8	0	0	158.32	3.7079	1.3815	1.8411
105	3.32635	-0.00211834	1.01458	6.81771	0	1	0	505.22	5.6294	2.5285	0.0546
107	7.94448	-0.0374622	0	6.81387	2	0	0	265.94	1.9297	1.6204	0.1967
110	0.840317	-0.149301	1.84492	4.91359	0	0	0	320.04	5.7459	2.7044	0.2285
116	2.36954	0.0436415	1.27896	7.7173	0	1	0.415609	406.25	4.0695	2.7953	0.0773
118	9.32315	0.0416632	1.80035	7.42459	2	1	0	311.84	4.0554	2.7699	0.1969
120	10.5816	-0.0820613	1.12414	6.46601	2	1	0	444.55	6.8965	2.6047	0.1656
121	5.95393	0.0450801	1.19759	5.0232	0	1	0	406.29	4.3809	3.2879	0.0829
122	8.02143	-0.0500824	1.08824	6.46477	2	0	0	539.51	8.6685	2.1758	0.1366
123	2.25241	-0.184128	1.06979	8.19141	0	0	1.23703	310.7	3.4701	2.6523	0.4774
124	25.7326	0.0701548	0.13073	6.999	0	1	0	422.03	2.4583	3.5102	0.5409
125	7.16996	0.176611	0	7.70312	0	2	0	210.3	-0.374	2.6555	0.1068
127	5.27442	-0.0162791	0	3.69299	0	0	0	94.22	1.3858	2.6545	0.0741
128	4.82227	0.211003	2.06794	7.999	0	2	0	322.28	2.6743	3.4081	0.1588
130	6.46418	-0.137657	1.12581	7.41178	0	0	0	340.39	4.0852	2.0996	0.1076
133	4.96955	0.185244	1.82289	8.36229	1	0	0	401.46	5.4043	2.3728	0.1544
134	2.98815	0.292231	1.42682	5.04381	0	0	0.463465	233.11	2.481	3.6736	0.2121
135	8.77307	0.288579	1.01101	7.999	0	2	1.25793	492.49	3.2712	4.3956	0.4506
136	11.5628	0.059076	0.929562	4.94051	0	1	0	350.49	5.5466	3.5394	0.0833
137	6.24894	0.0786258	1.92389	7.999	2	2	0	335.32	4.4683	2.8643	0.2314
138	3.34672	-0.0556343	3.38202	7.999	0	0	0	349.54	5.2589	2.8869	0.4522
141	3.89814	0.0171147	0	4.80066	1	0	0	380.9	3.4047	2.1586	0.0614
142	8.66974	-0.055111	0.0700422	4.25104	2	0	0	189.36	2.8749	2.3174	0.1238
144	7.04445	0.0618129	0.937461	6.81725	1	0	0.721728	320.48	2.9433	2.9481	0.1288
145	5.13171	0.187239	2.23907	7.999	0	2	0	333.3	4.1353	3.4667	0.1835
147	11.0992	0.179363	1.73016	6.999	0	4	0	286.38	2.4573	4.4544	0.195
148	16.9627	0.00190689	0.0626356	4.44818	2	1	0	242.38	3.2319	3.1447	0.2151
149	8.49171	0.186142	2.81412	4.54435	0	0	0.237053	217.34	3.2213	4.3792	0.4754
150	2.48718	-0.156665	0	3.98403	0	0	0.794547	102.18	0.0874	2.9104	0.2437
151	12.5526	0.0499862	0.719016	4.8526	0	0	0	376.53	6.0243	3.2024	0.1035
152	10.056	0.173657	0.762572	8.19141	0	0	0	359.45	5.5205	2.4119	0.1555
153	7.70035	-0.0861521	0.524588	7.4101	0	1	0.515479	374.42	4.7179	2.7479	0.1341
154	7.74901	-0.0208022	0.413649	4.82878	0	0	0.39788	311.44	3.9764	3.0383	0.0678
155	3.67155	-0.0315038	0.920633	5.01332	0	0	0	331.21	3.8275	2.6104	0.0689
156	9.86318	0.125225	0.767803	4.74383	1	0	0	306.44	5.216	3.0214	0.0825
157	6.88226	-0.0281684	1.02518	5.08009	2	0	0	336.85	4.2953	2.4647	0.1234
158	6.74025	0.0387678	1.37388	6.47058	5	0	0.318441	302.22	4.5551	2.0858	0.6522
160	6.06004	0.0376139	0.534326	5.27706	0	2	0	361.8	4.7523	3.2363	0.0443
161	6.06004	0.0376139	0.534326	5.27706	0	2	0	361.8	4.7523	3.2363	0.0443
162	8.47287	-0.0931236	1.72076	4.96378	0	1	0.532423	301.37	3.5582	3.9467	0.1968
163	10.1235	0.0989717	1.10791	6.81771	0	1	0	349.46	4.8113	3.1171	0.0716
164	14.0436	0.128006	0.425812	4.65524	1	0	0	303.54	4.8434	3.1415	0.1239
165	12.161	0.145673	0.538145	5.07014	0	1	0	421.54	4.8697	3.4966	0.0808
167	8.91224	-0.050555	1.14615	6.81771	0	1	0	419.93	6.6715	2.842	0.0768
168	4.97073	0.182804	1.02372	7.999	0	1	1.37171	407.37	2.2162	3.8118	0.495
169	8.11211	-0.0304033	0.749809	7.999	2	1	0	383.4	5.3313	1.9824	0.204
171	3.80226	0.0337948	2.33883	7.999	1	2	0	355.73	4.26	3.0222	0.2305
172	1.57862	-0.0305248	2.70631	7.999	0	1	0	248.2	4.1234	2.8326	0.293
174	4.02426	0.0684843	1.11284	8.20143	0	0	0	363.37	3.624	2.0557	0.0995
175	3.19659	0.177961	0.961162	8.20098	0	1	0	408.76	3.9494	2.4129	0.0801
176	2.68376	0.0984176	1.4126	8.20098	0	2	0	421.76	5.5255	2.7756	0.0999
177	4.13107	-0.0304773	1.21497	8.19141	0	1	0.590224	325.33	2.5106	2.7943	0.1313
178	4.19391	0.197492	0.862819	7.999	0	0	0.562361	232.23	2.0945	2.6928	0.1209
179	0.591861	0.00832254	1.06306	7.999	0	0	0.428847	383.59	4.835	2.1731	0.0991
180	5.35816	0.0597856	0.827759	5.12496	0	0	0	458.86	5.2654	2.7748	0.0603
182	5.21677	0.0669885	0.704073	7.999	0	0	0	329.34	3.6448	1.9939	0.0991
183	6.00752	0.103879	1.3775	7.999	0	0	0	312.32	4.2269	2.3924	0.1045
184	4.40971	0.0974665	1.07189	7.43283	2	1	0	403.92	4.7172	2.2407	0.144
185	6.35876	-0.0111457	1.22564	7.999	0	0	0.524592	323.34	4.2669	2.6381	0.1158
187	8.06425	-0.0518766	0.782807	7.999	0	1	0.319274	502.95	7.5028	2.6118	0.1085
188	3.5988	0.0613376	1.15559	8.25934	0	0	0.535992	381.33	4.276	2.4968	0.1114
189	3.24134	0.0211001	2.72794	7.40841	0	0	0	296.56	4.4497	2.8548	0.2881
190	13.2422	0.0853125	0.123965	4.70407	0	0	0	246.36	3.4133	3.0696	0.1199
191	4.76831	0.0583501	1.05363	5.17548	2	1	0	356.65	4.5228	2.768	0.137
192	6.81615	-0.0311748	0.614539	7.42651	1	1	0	308.35	2.6622	2.1747	0.0929
194	0.707994	-0.128133	0	7.999	0	1	0	207.12	2.3993	1.441	0.1888
195	5.19762	0.0578784	1.00526	7.999	1	0	0	345.78	3.9734	1.9285	0.1021
196	5.83875	-0.293793	0	7.46661	0	4	0.511643	169.09	-2.0671	3.0146	0.4531
197	2.62043	0.365381	0.688144	7.43292	0	1	0	345.17	3.6815	2.7303	0.1085
198	2.77581	-0.0128475	0.941649	7.999	0	1	0	361.72	4.416	2.1487	0.0868
199	9.23505	-0.0439179	0	4.80069	0	0	0	373.3	4.2377	2.5647	0.0707
200	12.7491	-0.21039	0.761916	4.49172	10	1	0	280.5	5.935	1.4106	2.9166
201	0.813581	-0.103698	0.900208	8.30766	0	0	1.28139	461.16	5.6148	2.6217	0.4911
202	9.48057	-0.075747	0.0900915	4.25254	3	0	0	203.39	3.3986	2.1589	0.2493
203	9.10484	0.148883	0.27438	7.41251	5	0	0	252.36	2.601	1.3815	0.7709
204	9.182	-0.0490055	1.11551	7.41198	5	0	0.286127	352.92	4.8921	1.7176	0.7078
205	9.51635	0.0268473	0.616623	8.50912	0	0	0.888736	494.53	6.7127	2.8016	0.3147
206	2.19687	0.0368718	0	4.79678	0	0	0.759028	99.1	-0.432	2.9422	0.1923
207	4.9333	0.0199152	0.934207	4.9463	0	0	0	297.2	3.35	2.7833	0.0687
208	5.48198	0.160881	1.07345	7.42932	0	1	1.2135	412.85	2.1859	3.8363	0.3764
210	5.83331	-0.103935	2.16913	6.35097	3	1	0	203.26	2.6751	2.6016	0.3992
212	1.78258	0.134099	1.12199	7.41011	0	1	0	286.12	3.6623	2.5368	0.0688
214	3.92183	0.126909	0.961992	7.4234	0	0	0.437678	330.19	2.8767	2.6524	0.0736
215	9.26975	0.0111642	0.20087	4.41935	2	0	0.657406	253.42	3.0889	3.0452	0.1879
216	15.9833	0.0652437	0.713124	5.02516	0	2	0.187192	345.44	3.7014	4.1659	0.1332
217	11.4424	0.208593	1.69257	7.42262	0	0	0.303042	359.53	4.7256	3.4178	0.1574
218	7.49911	-0.0315688	1.41286	4.9886	1	1	0	295.36	3.3851	3.185	0.1096
219	5.18006	-0.00561483	0.895079	7.999	2	1	0	359.35	3.0599	1.9117	0.1828
223	2.86095	0.273138	0.560208	5.04414	0	0	0.505965	249.11	2.3269	3.2922	0.147
225	9.06506	0.0140917	0.76048	5.44405	1	0	0.382573	411.91	5.8566	2.9668	0.0575
226	4.26049	0.107769	0.856585	6.35101	0	1	0	214.66	3.0112	2.7941	0.0395
229	6.33586	-0.000433499	1.30146	7.71548	3	2	0	339.35	0.8339	2.3653	0.3386
230	4.89612	-0.129976	0.935318	8.51043	1	0	1.23187	506.44	7.2123	2.5583	0.4737
231	9.2128	0.24576	0.97697	7.42438	0	1	0	279.37	2.3766	3.0691	0.0882
232	7.33305	0.0207102	0	4.46103	0	4	0	176.24	0.1176	3.878	0.1466
234	8.25744	0.41698	1.47531	4.97752	0	1	0	302.37	2.3577	4.1069	0.2484
235	6.9856	0.251022	0.380159	4.79088	0	1	0.560065	225.34	3.1078	3.844	0.1323
236	4.64498	0.133271	0.0364638	4.84224	0	1	0.614917	162.24	0.6522	3.4163	0.13
237	4.477	0.179548	1.24851	4.87382	0	0	0	345.66	4.9695	3.1499	0.1372
238	12.3999	0.256826	0.708158	7.42322	0	0	0.413313	368.52	4.451	3.2071	0.1757
239	3.94232	0.136806	0	5.0975	0	1	0	151.18	0.9388	2.7576	0.0511
242	0.618241	0.493125	0	3.97674	0	0	0	73.13	1.0128	3.0632	0.3235
243	8.20124	-0.193287	1.16275	4.22785	8	0	0	170.33	3.6163	1.4709	1.807
244	1.67399	-0.320648	0	6.81386	0	0	0	130.21	1.2561	1.2026	0.2051
245	8.09848	0.212877	1.10454	8.22535	0	1	0	360.38	4.166	2.8086	0.0993
246	9.45743	0.114704	1.09904	4.74423	1	0	0	283.83	3.5765	3.1284	0.0998
247	7.55946	0.451959	0.970512	4.95932	0	0	0	409.3	4.8894	3.5885	0.2506
248	6.70472	0.308717	0.175261	5.08154	0	0	0	214.33	1.4663	2.9442	0.1276
249	11.0776	-0.0176008	0.723365	7.40834	5	0	0	275.43	3.1272	1.4504	0.7657
250	21.0811	0.0354126	1.23163	6.46174	7	2	0	542.78	4.3701	2.8325	1.5751
251	8.05558	-0.100712	0.0832408	4.27375	4	0	0	187.34	2.5033	1.8463	0.4343
252	29.7855	0.0667238	0.929411	7.42534	9	3	0	732.07	4.4708	2.9533	2.9103
253	4.45158	0.220696	0	4.41837	3	0	0	155.24	1.1171	2.221	0.2828
255	2.84044	0.350723	0	4.2197	0	0	0	73.11	-0.4673	2.9211	0.1868
257	4.28997	-0.100095	2.32415	6.35099	1	1	0	186.22	2.3776	2.9533	0.2423
258	9.30474	0.0577919	0.793215	4.9489	0	0	0	271.39	3.2762	3.0322	0.073
259	3.55629	-0.048785	0	4.67388	1	3	0	116.13	1.3841	3.0055	0.145
261	7.50035	0.178344	0.425197	7.999	0	1	0	408.41	4.4227	2.4796	0.1006
262	4.65117	-0.0733205	0	4.94882	0	0	0	230.9	3.5139	2.2153	0.0577
263	4.4647	-0.00102251	0	3.7022	2	0	0	85.17	0.7811	2.2594	0.1369
265	2.0766	0.0888697	1.08913	7.999	0	0	0.449931	303.69	2.0238	2.4092	0.0902
266	0.314125	-0.129295	1.06621	8.36809	0	0	1.33685	492.73	6.7991	2.6615	0.5357
267	1.7376	-0.120821	1.05623	8.36532	0	0	1.39159	529.16	6.7439	2.8019	0.5683
270	4.40838	-0.157601	0.0770432	4.79222	0	0	0	170.22	3.081	2.1503	0.0687
271	11.0716	0.225842	1.39784	7.43042	0	1	1.74141	424.49	1.1569	4.8679	0.8619
273	6.86116	0.269485	1.44684	5.05356	0	1	0	345.25	5.2245	3.7753	0.1622
274	8.08312	0.183306	0.778597	7.42453	0	1	0	278.34	1.9155	2.8229	0.068
276	8.17522	0.00800493	0.706669	8.21038	3	0	0	539.58	4.7467	1.4755	0.3515
277	6.15039	0.181072	0	4.40674	1	0	0	143.21	0.4175	2.6327	0.0875
278	12.6823	0.108139	2.31464	7.39087	0	3	0	246.32	0.2442	4.2901	0.2599
279	8.80749	0.121449	0.39018	5.07705	1	0	0	293.83	3.3485	2.7026	0.0641
280	12.8823	0.236706	0.734499	4.98453	1	1	0.51719	400.52	3.2799	4.0538	0.143
282	1.98237	-0.226909	0	6.999	0	1	0	139.12	1.457	1.6231	0.1688
283	10.3563	0.0539469	0.108693	6.999	0	4	0	291.29	2.9029	3.5087	0.159
284	9.48057	-0.075747	0.0995748	4.25227	3	0	0	203.39	3.3311	2.1632	0.2489
285	7.09878	-0.247115	1.60571	6.35096	7	1	0	158.27	3.1742	1.4791	1.5331
286	8.89993	0.201953	0	6.999	0	1	0	295.32	5.0464	2.662	0.1028
287	8.2546	0.0200986	0	5.13466	0	0	0	266.32	4.8846	2.5173	0.0648
288	8.60133	0.156361	1.0153	7.999	1	0	0.441513	359.46	4.7365	2.6669	0.1131
289	7.64708	0.00167422	0.947977	5.06611	0	1	0	391.31	5.4387	3.2016	0.0582
290	11.0916	-0.205897	0.827613	4.49102	9	1	0	240.43	5.011	1.5334	2.3568
291	6.92916	0.02461	0.422636	7.43259	0	2	1.14191	300.34	3.42	3.6786	0.402
292	10.1593	0.256648	2.10807	7.40841	0	1	0	317.35	1.9558	3.6447	0.1964
293	15.9275	0.192712	0.868779	4.91556	0	3	0	318.42	3.1093	4.5934	0.1655
294	9.99506	-0.0917012	0.255078	6.45609	5	1	0	229.36	1.9418	1.6226	0.7752
295	2.04174	0.169495	0	6.35135	0	1	0	241.46	2.1681	2.3768	0.0675
296	5.99132	0.158198	0.567848	7.999	0	1	0	367.35	3.7112	2.4246	0.0824
297	14.4621	0.208773	1.14147	7.42601	2	1	0	400.57	5.0625	3.0261	0.2198
298	8.62334	0.00236987	1.53713	5.03493	4	1	0	330.28	4.51	2.7924	0.4843
299	8.10393	0.462573	1.06482	5.00044	0	1	0	238.33	2.0119	3.9781	0.2244
300	14.3425	0.239704	1.21563	4.90812	0	3	0	305.38	2.7347	4.7253	0.1837
301	4.12905	0.0972403	0.763439	8.36205	0	2	1.38036	468.38	3.3846	3.7473	0.5499
302	8.65878	0.105592	0.122085	4.52814	0	0	0.815017	225.34	2.5623	3.5934	0.2257
303	9.15842	0.0500345	0.185879	4.36544	0	0	0.723165	241.41	3.1205	3.529	0.1847
306	7.02705	0.0549166	0.0977154	4.54075	0	0	0.760819	229.75	2.9132	3.3612	0.1884
307	6.67745	0.0603526	1.16894	4.9014	0	1	0.584833	209.27	2.3035	3.8866	0.1348
308	2.47788	-0.19035	0	6.35098	1	1	0	74.09	0.437	1.6864	0.145
310	3.41489	0.170258	2.18058	5.43073	0	0	0.3696	256.14	4.1416	3.6706	0.2526
311	4.95376	-0.0113193	0.666117	5.02335	3	0	0.418531	344.29	3.3869	2.4173	0.2296
312	4.04245	0.259759	1.68341	7.999	1	0	0	426.7	4.8917	2.4591	0.1521
313	4.84525	0.00895115	0.937696	4.94269	0	0	0.678446	217.26	-0.2184	3.3624	0.143
314	7.19886	0.102509	0.67922	5.06582	0	1	0	387.85	4.6425	3.2058	0.0458
315	2.66291	0.266032	0.927793	8.20096	0	1	0	413.2	5.144	2.4971	0.0942
316	11.1766	0.246296	1.35786	4.85733	0	0	0	364.98	4.4311	3.6933	0.1936
317	1.24861	0.0257287	1.30492	7.999	1	0	0	491.13	6.509	1.7822	0.1178
318	9.98064	-0.108247	1.61135	5.15108	6	1	0	378.96	7.1551	2.3437	1.0648
320	5.84037	0.0091097	0.218415	4.73833	0	0	0.4525	199.28	2.6876	2.9556	0.0781
321	8.44876	-0.119249	0.958682	4.94245	0	0	0	321.4	4.772	2.7951	0.0791
322	0.366452	-0.0179632	2.90926	6.35124	0	1	0	242.06	2.9495	3.2876	0.4152
323	1.17001	-0.110357	1.26917	5.12629	0	0	0	308.14	5.1108	2.4729	0.1225
324	6.55458	0.0280649	0.558568	5.14506	0	1	0	372.83	4.6883	2.9846	0.0358
325	6.55458	0.0280649	0.558568	5.14506	0	1	0	372.83	4.6883	2.9846	0.0358
326	9.99424	0.163597	1.07832	7.7083	0	2	1.24615	431.5	1.1487	4.3753	0.4448
327	9.86869	0.210084	0.920055	4.98868	1	0	0	394.45	3.9307	3.1524	0.1088
328	8.33616	-0.0768976	1.01655	7.999	3	0	0.42862	331.4	3.5519	1.9278	0.3222
329	13.3747	0.00656828	1.02954	6.46521	5	0	0	327.54	3.1302	1.995	0.7194
330	8.90668	-0.143999	0.172218	4.77098	4	0	0.754763	232.36	3.1239	2.4106	0.5309
331	5.09856	0.0124266	0.0828061	4.53312	0	0	0.892339	201.69	2.1582	3.2968	0.2449
332	9.45743	0.114704	1.09904	4.74423	1	0	0	283.83	3.5765	3.1284	0.0998
333	13.3087	0.21714	1.24332	7.42929	5	2	0	370.53	5.6369	2.7741	0.7786
334	12.1978	0.143441	0.883053	7.42828	4	3	0.309598	373.49	3.5421	3.2087	0.5432
335	14.8522	0.067579	0.580777	4.35131	5	1	0	297.54	3.7831	2.82	0.7014
336	18.4455	0.0919234	0.0501592	4.86944	0	6	0	322.36	2.4403	5.1739	0.3733
338	12.4238	-0.177796	0.877635	4.27948	12	0	0	253.48	4.8134	0.8661	4.0961
339	9.72882	0.147203	0.425653	5.07668	2	0	0	307.86	3.6322	2.6264	0.1298
340	12.2846	0.174247	0.878318	7.42324	1	0	0.411612	352.52	4.9236	2.968	0.1397
341	10.5001	0.22153	1.05864	5.00993	1	0	0.367736	333.9	4.5772	3.5863	0.1196
342	7.6318	0.391179	1.84358	5.0023	0	0	0.499391	228.36	1.4332	4.3181	0.3284
343	3.28147	0.212025	1.00798	8.25218	0	1	0	418.76	5.673	2.4759	0.0853
344	6.00175	0.0571731	1.05349	7.999	3	1	0	440.85	2.4153	1.9387	0.3066
345	5.30165	0.305119	0	7.41175	0	0	0.465332	216.69	1.008	2.5987	0.1762
346	7.02705	0.14119	0.10993	4.54605	0	0	0.760819	229.75	2.7407	3.4929	0.2008
347	9.15842	0.124289	0.195173	4.40487	0	0	0.723165	241.41	2.948	3.6329	0.1943
348	3.0367	0.406657	0.532249	5.1035	0	6	0	365.96	3.5293	4.891	0.3295
349	1.73628	0.0334402	1.61005	8.30766	0	0	0	372.17	4.0338	2.0628	0.1291
351	11.1356	0.145327	1.29708	7.43088	4	1	0	331.45	3.4492	2.4372	0.4879
352	2.65744	-0.193555	0.472819	4.77313	0	0	0	201.27	2.1546	2.1744	0.0819
353	2.55231	-0.00934259	1.82425	5.04393	0	0	0	252.75	2.6236	2.9694	0.192
354	5.99727	0.207951	1.72529	8.36228	1	1	0	396.42	4.9252	2.7341	0.1313
355	3.36946	-0.232409	0.849028	5.02628	0	0	1.05904	220.28	1.1923	3.1942	0.361
356	6.83979	0.0481084	0.147103	4.93858	0	0	0	257.81	3.7266	2.5906	0.0535
358	4.87067	0.0612332	1.81892	7.4327	0	2	1.96498	342.44	2.7154	4.9549	1.1131
359	6.40959	0.545651	0.338801	4.7217	0	0	0	240.48	3.1558	3.4407	0.3032
361	5.94449	0.396263	0.893722	4.93582	0	3	0	301.14	4.1259	4.3159	0.1675
363	4.7051	0.336091	1.02344	7.7154	0	1	0	347.29	5.4692	2.8856	0.1006
364	9.3745	0.213899	1.5504	6.999	0	1	0.41338	214.32	1.8152	3.7572	0.1069
365	5.96544	0.0476348	0.976338	6.81771	0	1	0	665.02	7.0336	2.7397	0.0447
366	6.55702	0.175543	0.225631	5.0944	0	0	0	293.78	3.4939	2.7577	0.0739
367	5.07106	0.153258	2.46471	5.12491	0	0	0	304.69	3.96	3.6198	0.3443
368	10.2325	0.279939	0.692234	7.42775	0	1	0	314.46	2.6366	3.0526	0.1078
369	23.3879	-0.0269345	0.203026	4.1885	6	0	0	314.57	5.8689	2.5594	1.1766
371	3.94712	0.795506	0	7.41171	0	0	0	232.41	1.1076	2.8343	0.5248
372	1.18701	-0.266117	0	4.8543	0	0	1.53445	229.47	2.0847	3.104	0.7856
373	2.0538	0.10191	0.479732	6.3511	0	1	0	256.47	3.074	2.4897	0.0444
375	2.85375	0.353765	2.76022	4.87881	0	0	0	247.54	2.6664	3.9794	0.5708
376	3.10341	0.0732741	1.41071	8.50974	0	0	0	437.17	5.5792	2.0623	0.1194

## Sheet: Table S3-O-Rnd
Table S3. Descriptor values, experimental and predicted pLC50 values, hat values and standardized residuals of all training, test, and true external compounds of the O-Rnd model.
Modeling data set
ID	Status	SM5_X	VE1sign_B(m)	GATS1p	NdssC	CATS2D_04_DA	CATS2D_09_AL	LLS_01	ALogp2	SCH-6	minsCH3	MW	ALOGP	Experimental pLC50	Predicted pLC50	HAT i/i (h*=0.1746)	Std.Pred.Mod.Eq. Res.
11	Test	0	0.094	1.006	1	0	0	0.67	1.1964	0.0680414	1.828	263.13	3.7892	5.6567	5.1251	0.0149	-0.6217
15	Test	0	0.012	1.217	0	0	1	0.67	2.28493	0	2.26176	190.39	3.4093	4.8172	5.1111	0.0355	0.3474
25	Test	0	0.186	0.737	0	0	0	1	0.857476	0.0680414	2.0221	142.59	2.7132	5.1917	5.1055	0.0439	-0.1023
31	Test	0	0.365	1.185	1	0	0	0.5	1.6157	0	1.50222	190.3	1.1675	4.4257	4.3574	0.0415	-0.0809
48	Test	0.06	0.034	1.323	2	2	2	0.5	1.26001	0.295361	1.25362	290.36	2.9654	6.2324	4.9333	0.0446	-1.5426
53	Test	0.257	0.064	0.907	2	0	10	0.33	4.8356	1.10161	2.0444	434.31	5.6169	9.4475	9.2767	0.1648	-0.2168
62	Test	0	0.012	0.58	1	0	0	1	2.99913	0.102062	0	228.05	2.9349	6.9266	5.356	0.0369	-1.8575
65	Test	0	0.196	0.677	0	5	0	0.67	0.278678	0	0	200	0.0568	3.9355	3.7782	0.1688	-0.2003
68	Test	0	0.29	1.303	1	0	0	0.83	3.98362	0	2.15103	217.42	3.5135	4.6908	4.2423	0.03	-0.5286
70	Test	0	0.081	1.012	1	0	0	1	0.00033489	0.151375	1.53518	201.24	2.502	5.2245	4.7854	0.0226	-0.5155
94	Test	0	0.142	1.488	3	3	0	0.67	0.271649	0	1.1912	198.21	-0.4435	3.5117	2.8679	0.1019	-0.7885
95	Test	0.257	0.161	0.908	2	0	10	0.33	2.95599	1.1169	2.09065	416.32	5.4114	8.7473	8.9859	0.1745	0.3048
101	Test	0	0.332	0.858	1	0	0	0.83	2.56672	0.0680414	2.22848	162.31	1.6021	6.0062	4.9753	0.0507	-1.228
109	Test	0	0.059	1.018	1	0	0	0.83	4.03367	0	0	208.1	2.003	3.169	4.5789	0.0354	1.6661
114	Test	0	0.03	0.972	1	0	0	0.33	1.17896	0.151375	1.34313	341.2	5.0006	6.1972	5.9129	0.0313	-0.3352
118	Test	0	0.073	1.23	2	0	0	0.33	0.33791	0.0680414	1.7733	311.84	4.0554	5.039	5.0216	0.0334	-0.0206
119	Test	0	0.142	1.283	1	0	0	1	0.507799	0.0833333	1.99722	191.3	2.4278	3.4289	4.1867	0.027	0.8917
122	Test	0	0.085	0.672	3	1	2	0.5	1.76199	0.43425	0	539.51	8.6685	7.0244	6.3601	0.0531	-0.7924
125	Test	0	0	1.492	2	0	0	0.67	0.139876	0.0416667	1.43758	210.3	-0.374	3.5747	4.0858	0.0488	0.6083
126	Test	0	0.202	1.033	1	0	0	0.5	0.687075	0	1.68489	229.29	0.5657	4.273	4.8163	0.0237	0.6382
132	Test	0	0.371	1	0	0	0	0.67	9.18393	0	2.15135	274.45	2.9527	5.0537	5.4713	0.0667	0.5017
134	Test	0	0.107	0.894	1	0	0	1	1.13529	0.0680414	1.73693	233.11	2.481	5.0775	4.8057	0.0261	-0.3197
136	Test	0.257	0.198	1.124	2	0	6	0.5	3.84631	1.12573	2.06451	350.49	5.5466	7.9318	8.2606	0.1458	0.4129
141	Test	0.424	0	0.543	2	0	0	0.67	5.46671	1.53473	0	380.9	3.4047	8.7116	9.4994	0.3001	1.0929
147	Test	0.045	0.012	1.518	0	0	0	0.5	0.64064	0.348462	1.16687	286.38	2.4573	4.2955	5.4359	0.0615	1.3662
151	Test	0	0.238	1.142	0	0	5	0.5	0.685253	0.268729	1.99164	376.53	6.0243	8.264	5.9782	0.0445	-2.7141
158	Test	0	0.036	0.874	1	0	2	0.67	0.00540225	0.143944	2.0832	302.22	4.5551	5.9475	5.7301	0.028	-0.256
166	Test	0	0.216	1.194	0	0	0	0.67	5.47513	0.0680414	1.7111	278.36	3.3389	5.6057	5.1797	0.0197	-0.4994
179	Test	0	0.09	0.721	1	0	0	0.67	7.33218	0.136083	0	383.59	4.835	6.0411	6.0043	0.0287	-0.0433
185	Test	0	0.021	1.091	1	1	1	0.5	0.13061	0.166667	1.85202	323.34	4.2669	4.7772	5.4104	0.0238	0.7438
187	Test	0	0.077	0.991	1	0	10	0.17	2.16149	0.253437	1.78522	502.95	7.5028	7.5554	7.0929	0.1081	-0.5683
199	Test	0.12	0.015	0.456	2	0	0	0.67	16.2627	0.786639	0	373.3	4.2377	7.727	9.128	0.1553	1.7692
202	Test	0	0.064	1.29	1	0	0	0.83	0.0404412	0	2.14446	203.39	3.3986	4.7642	4.2397	0.0288	-0.6177
205	Test	0	0.147	1.06	2	0	4	0.33	9.34219	0.238835	2.06406	494.53	6.7127	6.8203	6.9317	0.0419	0.1321
207	Test	0.189	0.108	0.957	0	0	1	0.67	4.11278	0.170103	0	297.2	3.35	5.1742	4.9937	0.0364	-0.2134
209	Test	0.13	0.013	0.983	1	2	1	0.67	0.0127464	0.25	0	255.69	1.7669	3.0476	4.5722	0.05	1.8154
214	Test	0.06	0.284	0.979	3	2	0	0.5	0.222218	0.315898	1.80442	330.19	2.8767	4.8955	4.8959	0.0607	0.0005
221	Test	0	0.101	0.614	0	0	0	0.83	2.61954	0.136083	0	289.54	5.116	6.0023	5.6084	0.0299	-0.4641
223	Test	0	0.122	0.909	1	0	0	0.83	0.83065	0.0680414	1.45904	249.11	2.3269	4.9071	4.8913	0.0144	-0.0184
228	Test	0.189	0.121	0.981	0	1	4	0.17	1.98077	0.253437	1.30986	397.81	4.2406	5.8705	5.9211	0.0396	0.0599
231	Test	0	0.134	1.439	2	0	0	0.67	0.090601	0.0680414	1.30805	279.37	2.3766	3.3255	3.9996	0.0288	0.7938
244	Test	0	0.049	0.743	0	0	0	0.83	2.12139	0	0	130.21	1.2561	5.7344	4.9806	0.03	-0.8883
259	Test	0.13	0.248	1.714	1	0	0	1	0.0339296	0.201184	1.95102	116.13	1.3841	2.4019	3.2629	0.0558	1.0283
277	Test	0.189	0.155	1.695	0	0	0	1	0.61215	0.433013	2.19083	143.21	0.4175	2.8115	4.3093	0.077	1.8094
287	Test	0	0.043	0.281	0	0	0	0.83	10.6354	0.037037	0	266.32	4.8846	6.5532	6.7012	0.071	0.1782
293	Test	0	0.295	1.397	0	0	0	0.33	7.62588	0.0833333	1.98014	318.42	3.1093	6.57	5.521	0.0472	-1.2472
301	Test	0	0.173	1.459	2	6	6	0.33	0.248502	0.151375	1.0271	468.38	3.3846	3.3483	3.6015	0.2858	0.3478
302	Test	0	0.29	1.654	0	4	0	0.5	0.621259	0.0680414	1.53536	225.34	2.5623	4.0561	3.1611	0.1251	-1.1106
308	Test	0	0.265	1.582	1	0	0	1	0.0236237	0	1.59954	74.09	0.437	3.1621	3.0884	0.0415	-0.0874
309	Test	0.189	0.123	1.023	1	1	1	0.5	3.32698	0.166667	2.00414	291.81	3.0987	4.2948	5.1048	0.0241	0.9516
319	Test	0	0.091	1.145	2	1	4	0.17	1.56876	0.215464	0.991156	464.38	3.1434	4.9034	5.7751	0.035	1.0299
323	Test	0	0.158	0.736	0	0	0	0.67	3.29132	0.20693	0	308.14	5.1108	6.0573	5.8467	0.0341	-0.2487
325	Test	0	0.014	1.08	1	0	2	0.17	0.350346	0.219416	1.65051	372.83	4.6883	5.9705	6.31	0.0404	0.4023
329	Test	0	0.28	1.18	4	2	2	0.33	0.107125	0.0555556	1.86221	327.54	3.1302	3.2848	4.0829	0.0772	0.9644
336	Test	0	0.659	1.444	0	0	0	0.33	8.87563	0	2.00155	322.36	2.4403	5.5083	4.6881	0.1605	-1.0389
337	Test	0.13	0.103	1.525	1	0	1	0.67	6.45922	0.201184	2.23899	197.36	2.9886	4.0448	5.0159	0.0469	1.1545
338	Test	0.13	0.101	1.518	1	0	2	0.67	13.6419	0.201184	2.26896	253.48	4.8134	5.7049	5.8158	0.1199	0.1372
340	Test	0	0.183	1.147	2	0	1	0.33	1.83575	0.151375	1.89684	352.52	4.9236	4.8164	5.4835	0.0241	0.7837
341	Test	0.06	0.194	1.099	1	1	5	0.33	2.42145	0.341385	1.84482	333.9	4.5772	7.2732	6.1806	0.0306	-1.2879
352	Test	0.263	0	0.726	0	0	0	0.83	0.028968	0.358305	0	201.27	2.1546	5.2319	5.2585	0.0477	0.0317
355	Test	0.189	0.172	0.864	1	0	2	0.67	0.00137641	0.204124	0	220.28	1.1923	4.5234	4.6373	0.0405	0.135
359	Test	0	0	0.677	2	0	0	0.83	9.95907	0	2.2432	240.48	3.1558	6.4464	6.1855	0.0958	-0.3185
366	Test	0.189	0.089	1.121	1	0	1	0.5	4.13472	0.166667	1.86544	293.78	3.4939	4.8552	5.2754	0.0227	0.4934
1	Training	0	0.183	0.531	0	0	0	1	6.22353	0	0	236.33	2.4937	3.8233	5.2742	0.0477	1.7256
2	Training	0	0	0.935	0	0	0	1	0.148071	0.0833333	0	134.14	1.3488	6.4648	4.6153	0.0413	-2.1922
3	Training	0.089	0.055	0.758	1	0	0	0.83	0.00195364	0.315641	0	151.2	1.3753	5.3045	5.3744	0.0298	0.0824
5	Training	0	0.23	1.863	0	0	0	1	1.24144	0.0680414	2.22917	171.33	1.4094	3.7691	3.3546	0.0679	-0.4982
8	Training	0	0.093	0.743	1	0	0	1	0.79727	0.0680414	0	221.04	2.8119	2.9752	4.6272	0.031	1.9477
9	Training	0	0.086	1.148	1	0	5	0.33	0.158086	0.0680414	2.11084	321.22	4.2607	5.1866	5.5978	0.0417	0.4874
12	Training	0	0.072	0.853	1	0	0	0.83	0.72778	0.0680414	0	249.1	3.1679	4.241	4.7126	0.0269	0.5548
13	Training	0	0.102	0.74	0	0	0	0.83	0.547896	0.170103	0	218.69	4.2016	5.4825	5.3154	0.0314	-0.1971
16	Training	0.06	0.025	0.895	1	0	0	1	0.00337561	0.351579	1.91641	165.23	1.5812	5.8378	5.6404	0.0408	-0.2339
17	Training	0.089	0.197	1.353	0	0	0	1	0.191319	0.260491	1.90194	126.18	0.3509	3.011	4.3972	0.0343	1.6372
18	Training	0	0.044	0.455	4	0	0	1	2.3504	0.0555556	0	198.43	1.4295	4.1972	4.8327	0.0946	0.775
20	Training	0	0.065	0.638	1	0	0	0.83	0.182329	0	2.07311	281.11	2.2675	6.6069	5.2575	0.0468	-1.6041
21	Training	0.089	0.078	0.515	3	0	0	0.83	5.7078	0.288675	0	187.07	2.3891	7.1259	5.9072	0.0532	-1.4537
24	Training	0	0.295	0.818	0	0	0	1	2.45862	0.0555556	2.04293	156.62	3.1994	5.314	4.921	0.0502	-0.4681
26	Training	0	0.496	1.402	1	0	0	0.67	4.624e-05	0	1.37181	183.19	-0.2833	3.2215	3.3753	0.072	0.1853
29	Training	0.13	0.07	0.759	1	0	0	0.83	1.3456	0.219416	2.10266	210.3	2.4168	5.3784	5.516	0.0346	0.1626
32	Training	0	0.046	1.644	1	0	0	0.5	0.0651781	0	1.2304	222.3	0.1517	3.7236	3.9507	0.0569	0.2714
33	Training	0	0.106	1.418	0	0	0	1	0.0669774	0	0	58.09	0.2588	4.7306	3.3904	0.0646	-1.6083
36	Training	0	0.239	1.183	0	2	0	0.5	0.066049	0.0680414	2.03619	227.38	2.743	4.8252	4.4808	0.0421	-0.4084
38	Training	0	0.239	1.401	1	0	0	0.83	0.77106	0.0680414	1.53113	208.29	2.242	4.4673	3.9358	0.0207	-0.6234
39	Training	0.457	0.084	0.998	1	1	0	0.67	0.0443945	0.191638	1.3484	227.67	1.5056	4.2111	3.6758	0.0929	-0.6524
41	Training	0	0.148	0.679	0	1	0	0.67	0.852114	0.151375	0	275.53	4.3922	6.294	5.2994	0.0361	-1.1757
43	Training	0	0.273	1.277	0	2	0	0.5	0.0185777	0.0680414	2.02195	215.72	2.5357	4.6095	4.2686	0.0437	-0.4046
44	Training	0	0.092	1.153	2	0	0	0.17	0.316856	0.25	1.28018	403.42	3.6836	5.9336	5.8276	0.0517	-0.1264
45	Training	0.03	0.231	0.94	2	0	0	0.83	2.17858	0.333333	1.81749	241.48	0.9231	5.7321	5.5385	0.0345	-0.2286
46	Training	0.067	0.106	1.346	1	0	0	0.83	0.0279893	0.341746	1.49285	223.25	1.4788	5.2152	4.8765	0.027	-0.3986
47	Training	0	0.143	1.283	0	0	0	0.17	5.1579	0.0555556	1.62577	335.32	4.4008	6.6169	5.7433	0.0441	-1.0371
49	Training	0	0.12	1.143	0	0	12	0.33	0.30217	0.102062	2.08656	397.57	3.4993	5.742	6.187	0.1852	0.5721
52	Training	0	0.041	0.983	1	0	0	0.67	0.00632025	0.204124	0	212.26	3.2689	5.1807	5.1659	0.0344	-0.0175
54	Training	0.089	0.075	0.842	1	0	0	0.83	0.00071824	0.358305	0	251.35	2.3965	6.7567	5.3541	0.0321	-1.6547
57	Training	0.089	0.016	0.804	1	2	3	0.5	4.21399	0.343419	1.4678	414.23	5.1938	6.748	6.3959	0.0424	-0.4176
58	Training	0	0.064	0.72	1	1	3	0.67	0.413706	0.25	0	343.22	4.5205	5.1042	5.6755	0.0379	0.676
59	Training	0	0.312	0.95	4	1	0	0.83	0.00544644	0.0453609	1.79365	261.14	1.4107	3.8642	3.767	0.08	-0.1176
63	Training	0	0.012	0.418	0	0	0	1	1.8279	0.0555556	0	276.91	2.9383	5.1222	5.481	0.0456	0.4262
64	Training	0.272	0.19	0.742	0	0	1	0.5	4.7524	0.40326	0	377.08	3.1816	5.346	6.0161	0.0536	0.7994
67	Training	0	0.235	1.232	0	4	0	0.33	4.92929	0.0555556	1.82452	295.38	4.0779	5.9021	4.6043	0.1073	-1.5942
69	Training	0.04	0	0.748	2	0	0	0.67	7.41854	0.347716	0	349.07	3.5113	7.0587	6.5651	0.0397	-0.5846
71	Training	0.089	0	1.137	1	2	0	0.67	0.161684	0.287457	1.30356	191.21	1.6508	5.7118	4.8762	0.0426	-0.9912
72	Training	0.067	0.129	1.265	1	0	0	0.83	0.60762	0.341746	1.5241	221.28	2.2344	5.7428	5.0309	0.0223	-0.8357
73	Training	0	0.221	0.909	3	1	0	0.83	0.02605	0.185395	1.89954	235.33	1.4139	5.0392	4.6328	0.0459	-0.4829
74	Training	0.457	0.212	1.215	5	2	1	0.5	0.182244	0.166667	1.67522	252.29	0.3773	3.5843	2.6015	0.1981	-1.2737
76	Training	0.03	0.044	0.789	1	0	0	0.83	0.00010609	0.39614	1.29862	274.71	2.9672	4.9871	6.107	0.0334	1.3221
77	Training	0	0.207	0.224	0	0	0	1	14.1308	0	0	164.37	3.288	7.3089	6.5147	0.1248	-0.9854
79	Training	0	0.043	0.467	0	0	0	0.83	9.28177	0.037037	0	265.9	4.2454	6.9135	6.2729	0.0522	-0.7637
80	Training	0	0.238	1.055	1	0	0	1	0.507656	0.0833333	1.82338	213.68	2.9843	4.5738	4.3433	0.0256	-0.2711
81	Training	0	0.035	1.172	0	0	0	0.17	12.4475	0.0555556	2.01571	350.6	4.5994	7.4645	6.9253	0.0749	-0.6507
82	Training	0	0.028	1.199	0	0	0	0.33	9.16455	0.0555556	1.70755	322.54	3.9018	7.4082	6.2749	0.0463	-1.3469
84	Training	0	0.214	1.275	1	0	0	1	3.7803	0.0555556	1.53793	193.27	3.0522	4.614	4.2087	0.0291	-0.4774
86	Training	0	0.19	1.212	3	0	2	0.17	7.27705	0.113402	1.95859	362.79	3.8934	5.6103	5.9266	0.0451	0.3757
90	Training	0	0.126	1.205	1	0	0	0.83	0.0965966	0.102062	2.13344	215.4	3.337	4.5735	4.6191	0.0192	0.0534
91	Training	0.486	0.025	1.041	2	0	1	0.33	2.4174	0.25968	0	412.39	4.9877	5.5983	4.3543	0.1295	-1.5475
92	Training	0	0.078	1.17	2	0	3	0.17	3.74693	0.166667	1.36243	447.49	5.1221	4.8	6.0643	0.028	1.4883
96	Training	0.257	0.159	1.094	2	0	10	0.33	3.33866	1.1169	2.02094	375.5	5.5193	9.0064	8.7202	0.1684	-0.3642
97	Training	0.581	0.122	0.998	0	1	1	0.5	0.131334	0.375767	2.1575	291.81	2.9175	4.1863	4.4701	0.1314	0.3535
98	Training	0.457	0.273	1.027	0	0	0	0.83	0.0502656	0.306186	2.01759	225.32	3.4454	4.9707	4.0095	0.1018	-1.1772
103	Training	0	0.071	0.57	0	0	0	0.67	9.87531	0.166667	0	354.48	6.3311	7.9368	6.7811	0.0451	-1.3727
105	Training	0.257	0.162	0.76	2	0	10	0.33	3.75313	1.1169	2.10626	505.22	5.6294	8.7444	9.3003	0.1844	0.7144
107	Training	0	0.044	0.591	0	0	0	1	3.47487	0	0	265.94	1.9297	5.2047	5.1343	0.0385	-0.0832
108	Training	0	0.097	0.555	0	0	0	1	2.32044	0.0680414	0	172.01	3.0377	4.392	5.2166	0.0355	0.9744
110	Training	0	0.036	0.614	0	0	0	0.67	7.04319	0.166667	0	320.04	5.7459	6.6601	6.4842	0.0344	-0.2077
111	Training	0.03	0.219	1.117	2	0	0	0.83	1.77289	0.333333	1.79994	197.03	0.8141	5.3355	5.2361	0.0287	-0.117
115	Training	0	0.034	0.392	0	0	0	0.67	1.95664	0.0555556	0	207.02	2.3066	5.5678	5.9438	0.047	0.4471
120	Training	0	0.118	0.839	3	2	3	0.67	0.189573	0.452979	0	444.55	6.8965	6.8154	5.5525	0.0764	-1.5251
121	Training	0.272	0.196	0.989	0	0	6	0.33	1.17419	0.486593	2.02393	406.29	4.3809	5.638	6.5025	0.0668	1.0386
123	Training	0	0.24	0.803	2	1	1	0.5	0.907256	0.151375	0	310.7	3.4701	3.3462	4.9442	0.0455	1.8984
124	Training	0	0.242	0.583	0	0	0	0.67	0.874599	0.0833333	1.98322	422.03	2.4583	6.5114	5.7438	0.0644	-0.921
127	Training	0	0	0.615	0	0	0	1	1.92044	0	2.48817	94.22	1.3858	4.9918	5.5921	0.0782	0.7257
137	Training	0	0.13	1.283	0	0	0	0.17	3.92555	0.0555556	1.76826	335.32	4.4683	6.7898	5.6735	0.045	-1.3257
139	Training	0.034	0	0.946	2	0	0	0.67	4.69156	0.599595	0	406.92	2.1414	8.625	6.8534	0.0676	-2.1293
142	Training	0	0.042	1.275	1	0	0	0.83	0.141903	0	2.13664	189.36	2.8749	3.9659	4.3084	0.0313	0.4039
144	Training	0.263	0.132	0.84	1	1	0	0.33	0.0143042	0.274972	2.02296	320.48	2.9433	5.1672	5.3559	0.0493	0.2246
145	Training	0	0.118	1.205	1	0	0	0.17	15.6001	0.0555556	1.57744	333.3	4.1353	6.3892	6.8044	0.0878	0.5044
146	Training	0	0.679	1.682	0	0	0	0.83	0.254722	0	0	144.5	-0.6575	1.6758	2.2688	0.1916	0.7654
149	Training	0	0.184	1.184	1	0	0	1	1.65508	0.116154	2.00348	217.34	3.2213	4.0818	4.5006	0.0256	0.4925
153	Training	0.045	0.134	0.992	2	0	6	0.17	0.393631	0.578978	1.57636	374.42	4.7179	7.4942	7.3745	0.0602	-0.1433
154	Training	0.045	0.044	0.879	2	0	0	0.17	0.119301	0.475716	1.90213	311.44	3.9764	5.6241	7.0853	0.0744	1.7627
155	Training	0	0.034	0.723	0	2	0	0.67	0.552644	0.268729	0	331.21	3.8275	4.9638	5.5709	0.0567	0.7255
156	Training	0	0.051	1.104	0	0	3	0.5	2.78656	0.234708	2.22752	306.44	5.216	7.8952	6.3971	0.0305	-1.7659
157	Training	0.189	0.043	0.921	0	0	4	0.33	0.312257	0.287457	0	336.85	4.2953	5.3513	5.7892	0.0582	0.5237
159	Training	0	0.277	1.291	0	0	0	0.5	5.32271	0.0680414	1.59441	277.26	2.6915	5.1949	5.1129	0.0281	-0.0965
162	Training	0	0.075	1.229	1	0	1	0.5	0.00026569	0.185395	1.75908	301.37	3.5582	5.426	5.3509	0.0182	-0.088
164	Training	0	0.261	1.373	0	0	5	0.5	3.63474	0.151375	2.17912	303.54	4.8434	4.9431	5.5212	0.044	0.6862
165	Training	0.06	0.158	1.197	1	0	10	0.17	1.36119	0.453641	1.81517	421.54	4.8697	8.6634	7.0501	0.0998	-1.9734
168	Training	0	0.106	1.481	1	6	5	0.33	0.00341056	0.151375	1.28095	407.37	2.2162	3.5492	3.8083	0.2756	0.3533
170	Training	0	0.234	0.724	0	4	0	0.17	21.0186	0.113402	0	465.11	5.7708	6.8042	7.0167	0.2312	0.2813
171	Training	0	0.133	1.09	0	0	0	0.17	8.84408	0.0555556	1.78162	355.73	4.26	6.9829	6.4714	0.0488	-0.6087
172	Training	0.189	0.026	0.947	0	1	0	0.83	1.81145	0.493121	0	248.2	4.1234	5.7227	5.5238	0.0526	-0.2371
173	Training	0.13	0.167	1.047	2	0	0	0.67	1.45733	0.176777	0	291.72	1.5684	3.8852	4.3487	0.0371	0.5482
174	Training	0.13	0.071	1.056	1	0	2	0.17	1.51265	0.225592	1.76253	363.37	3.624	4.7887	6.004	0.0289	1.4313
175	Training	0	0.092	1.129	4	0	3	0.17	5.18655	0.111111	0.987837	408.76	3.9494	5.0374	5.6801	0.0653	0.7715
176	Training	0	0.145	0.929	0	0	4	0.17	16.1588	0.123597	1.51464	421.76	5.5255	7.2101	7.8214	0.0979	0.747
178	Training	0	0.036	1.276	1	0	0	1	0.455625	0.0833333	1.50292	232.23	2.0945	4.4248	4.2543	0.0343	-0.2014
180	Training	0	0.047	1.07	2	0	0	0.17	0.482469	0.33677	1.38527	458.86	5.2654	6.0231	6.3686	0.0565	0.4128
182	Training	0	0.002	0.951	3	0	0	0.67	0.204485	0.240951	1.73908	329.34	3.6448	4.6923	5.5361	0.0365	0.9977
183	Training	0	0.009	1.169	0	2	0	0.5	3.65651	0.185395	1.79874	312.32	4.2269	4.2626	5.5929	0.0508	1.5848
184	Training	0.06	0.043	0.876	3	0	3	0.17	2.5192	0.384123	1.3973	403.92	4.7172	6.9728	6.8677	0.0355	-0.1242
188	Training	0.089	0.151	0.97	1	2	0	0.5	2.32136	0.346225	1.38956	381.33	4.276	5.7959	5.5534	0.0321	-0.2861
190	Training	0	0.092	0.835	0	0	0	0.67	1.41111	0.102062	2.17533	246.36	3.4133	6.8474	5.7619	0.0334	-1.2815
191	Training	0	0.028	1.08	1	0	4	0.33	0.86732	0.0555556	2.10953	356.65	4.5228	5.7393	5.7778	0.0385	0.0456
193	Training	0.189	0.068	1.135	0	0	0	1	0.120062	0.102062	0	96.09	0.9846	4.2399	3.6487	0.057	-0.7066
194	Training	0	0.093	0.905	0	0	0	0.67	1.68454	0.0680414	0	207.12	2.3993	5.0707	5.0564	0.029	-0.0169
195	Training	0.189	0.089	1.146	1	0	1	0.33	0.615911	0.151375	1.95867	345.78	3.9734	5.7753	5.0799	0.0297	-0.8193
197	Training	0	0.116	0.866	1	1	2	0.33	1.38721	0.111111	1.27537	345.17	3.6815	5.2369	5.6906	0.0232	0.5328
200	Training	0	0.04	1.476	1	0	2	0.67	0.0448169	0	1.4621	280.5	5.935	3.4705	4.1508	0.041	0.8062
211	Training	0.045	0.056	1.159	4	0	10	0.33	6.37058	0.442034	1.03182	527.87	5.8264	7.4946	6.9539	0.1462	-0.6792
212	Training	0.045	0.228	0.881	2	0	0	0.83	4.59331	0.359562	1.55109	286.12	3.6623	5.0032	5.8596	0.0368	1.0127
213	Training	0.245	0.025	1.071	0	1	3	0.33	0.667489	0.434692	2.21893	333.9	4.0142	5.3389	6.1882	0.0451	1.0086
217	Training	0.13	0.052	1.036	2	0	0	0.17	2.15561	0.253934	1.76322	359.53	4.7256	5.1132	5.9764	0.0376	1.0211
218	Training	0.099	0.01	1.037	2	0	0	0.67	0.0616032	0.380901	1.77372	295.36	3.3851	5.9388	5.6897	0.0258	-0.2929
219	Training	0.541	0.144	1.161	1	0	0	0.33	0.316294	0.411054	0.906767	359.35	3.0599	3.3513	4.4005	0.1116	1.2919
225	Training	0	0.098	1.046	1	0	1	0.33	1.99544	0.151375	1.57098	411.91	5.8566	4.9713	5.8714	0.0205	1.0554
226	Training	0	0.123	0.988	1	0	0	1	0.78606	0.0680414	1.52573	214.66	3.0112	3.1033	4.5472	0.0207	1.6934
232	Training	0	0.449	1.95	0	0	0	0.83	1.63022	0	1.81519	176.24	0.1176	3.4298	2.7943	0.0853	-0.7712
234	Training	0.089	0.016	0.971	2	0	0	0.33	7.45672	0.232308	1.59798	302.37	2.3577	7.4013	6.4765	0.0305	-1.09
235	Training	0	0.318	1.027	1	0	0	0.83	3.98082	0.0555556	1.55462	225.34	3.1078	5.5087	4.6776	0.0288	-0.9788
236	Training	0	0.035	1.123	2	0	0	0.67	0.571234	0	1.50264	162.24	0.6522	5.1202	4.5228	0.0264	-0.7026
237	Training	0	0.076	0.857	0	0	0	0.5	2.40343	0.166667	1.7184	345.66	4.9695	6.9823	6.1972	0.0292	-0.9248
239	Training	0	0.111	1.066	1	2	0	1	0.545678	0.0833333	1.32815	151.18	0.9388	3.7965	3.9905	0.0465	0.2305
242	Training	0	0.112	0.685	0	0	0	1	0.00091809	0	1.73843	73.13	1.0128	6.1548	4.9269	0.0407	-1.455
245	Training	0.257	0.019	1.258	1	0	1	0.5	11.189	0.964032	1.1418	360.38	4.166	8.4775	8.2138	0.1412	-0.3302
246	Training	0	0.058	1.243	1	0	0	0.67	0.667979	0.0680414	1.68055	283.83	3.5765	3.7718	4.7261	0.0177	1.1175
247	Training	0	0.179	1.04	1	0	2	0.5	2.89612	0.100916	1.51933	409.3	4.8894	4.4134	5.4759	0.0124	1.2408
248	Training	0	0.236	1.022	3	1	0	0.67	2.15004	0.0555556	1.92416	214.33	1.4663	3.4458	4.4264	0.0393	1.1612
249	Training	0.217	0	1.26	2	0	0	0.67	3.7249	0.641206	2.16412	275.43	3.1272	6.2128	6.3272	0.0601	0.1369
251	Training	0	0.016	1.162	1	0	0	1	0.0911436	0	2.15985	187.34	2.5033	5.4944	4.2994	0.0439	-1.4184
255	Training	0	0.255	2.073	0	0	0	1	0.249101	0	1.6875	73.11	-0.4673	1.0126	2.5264	0.0979	1.8498
257	Training	0	0.104	0.84	1	0	0	1	0.042025	0.151375	0	186.22	2.3776	3.8228	4.6635	0.031	0.9911
261	Training	0	0.049	1.169	3	0	8	0.17	0.509368	0.166667	1.2176	408.41	4.4227	7.465	5.8674	0.0933	-1.9471
262	Training	0	0.08	0.55	0	0	0	1	4.93684	0.0833333	0	230.9	3.5139	4.4184	5.5692	0.038	1.3618
263	Training	0.189	0.305	1.653	0	0	0	1	0.191231	0.144338	2.17361	85.17	0.7811	1.4462	3.0979	0.0619	1.9793
265	Training	0	0.061	0.931	3	2	0	0.67	0.2507	0.138889	1.66315	303.69	2.0238	4.5739	4.6733	0.0522	0.1185
266	Training	0	0.244	1.035	2	1	1	0.17	18.0294	0.136083	0	492.73	6.7991	6.0024	6.6991	0.1282	0.8661
268	Training	0.13	0.126	1.206	1	0	1	0.67	3.49391	0.201184	2.23924	213.38	3.1584	6.6433	5.1776	0.0199	-1.7183
270	Training	0	0.094	0.797	0	0	0	0.83	0.211876	0.185395	0	170.22	3.081	4.7014	5.2573	0.0322	0.6558
272	Training	0	0.167	1.395	0	0	4	0.33	0.00284089	0.0555556	1.8397	346.41	2.3542	5.0017	5.0494	0.0395	0.0565
273	Training	0.089	0.082	1.081	2	0	0	0.33	8.37292	0.255449	1.97303	345.25	5.2245	5.4869	6.4525	0.0336	1.1399
275	Training	0	0.017	1.256	3	0	0	0.5	0.0996665	0	1.43131	219.3	0.2121	4.7177	4.3625	0.0493	-0.4229
278	Training	0	0.374	1.426	0	0	0	0.5	0.269153	0	1.4864	246.32	0.2442	5.5281	3.9723	0.0507	-1.8533
279	Training	0.189	0.09	1.081	0	1	1	0.5	3.29422	0.166667	2.04497	293.83	3.3485	4.024	5.2226	0.0291	1.4118
280	Training	0	0.321	1.295	1	0	6	0.17	0.0122545	0.193041	1.42574	400.52	3.2799	6.0711	5.4939	0.0711	-0.6951
282	Training	0	0.171	0.784	0	0	0	0.67	0.03992	0.0833333	0	139.12	1.457	4.2014	5.0014	0.0384	0.9469
283	Training	0	0.171	1.295	0	0	2	0.5	4.69112	0.0833333	1.91662	291.29	2.9029	5.4209	5.4513	0.0204	0.0357
284	Training	0	0.049	1.29	1	0	0	0.83	0.00786769	0	2.08914	203.39	3.3311	4.439	4.2486	0.0301	-0.2244
285	Training	0	0.292	1.525	1	0	2	0.67	3.54079	0	2.17783	158.27	3.1742	3.2403	4.1733	0.0342	1.1019
288	Training	0.208	0.004	1.058	1	2	2	0.17	3.75623	0.351268	1.36855	359.46	4.7365	5.969	5.9906	0.0416	0.0256
291	Training	0	0.363	1.137	2	1	0	0.33	0.332122	0.166667	1.26883	300.34	3.42	5.3162	4.682	0.0596	-0.759
292	Training	0.04	0	0.946	2	0	0	0.33	0.656748	0.347716	1.73508	317.35	1.9558	6.3206	6.4343	0.0397	0.1347
294	Training	0	0.181	1.591	1	1	1	0.67	3.83886	0.0833333	1.90565	229.36	1.9418	3.1231	4.2346	0.0345	1.3128
295	Training	0	0.019	0.375	1	1	0	0.67	1.06626	0.0453609	0	241.46	2.1681	4.8916	5.5054	0.047	0.7298
296	Training	0	0.022	1.226	2	0	3	0.33	0.443822	0.166667	1.23363	367.35	3.7112	6.7199	5.4899	0.0315	-1.4505
297	Training	0.04	0.137	1.324	4	0	4	0.17	5.16698	0.292825	1.81594	400.57	5.0625	4.5127	6.0324	0.0535	1.8129
299	Training	0	0.06	1.675	1	0	0	0.83	2.01612	0.0555556	1.62358	238.33	2.0119	3.6447	3.9103	0.0549	0.317
303	Training	0	0.278	1.204	0	2	0	0.5	0.00189225	0.0680414	2.07786	241.41	3.1205	4.7482	4.386	0.0458	-0.4303
304	Training	0	0.192	1.081	1	0	0	1	0.00160801	0.102062	2.04651	211.71	2.6276	6.0953	4.4437	0.0263	-1.9425
306	Training	0	0.312	1.295	0	2	0	0.5	0.190794	0.0680414	2.06362	229.75	2.9132	4.3298	4.2024	0.0478	-0.1514
307	Training	0	0.007	1.376	1	0	0	0.67	0.00698896	0.0833333	1.50818	209.27	2.3035	4.7524	4.5478	0.0313	-0.2413
310	Training	0	0.049	0.783	1	0	0	0.83	4.89648	0.0680414	1.81961	256.14	4.1416	4.3831	5.7056	0.0314	1.5596
311	Training	0.499	0.097	0.702	1	1	1	0.17	0.798342	0.38658	0	344.29	3.3869	5.2805	5.1367	0.115	-0.1774
312	Training	0.089	0.075	0.934	1	0	9	0.33	5.42378	0.262892	1.38976	426.7	4.8917	6.3606	6.9042	0.0947	0.6631
314	Training	0.13	0.02	1.087	1	0	2	0.17	0.338142	0.318041	1.29936	387.85	4.6425	7.7962	6.1279	0.0344	-1.9704
316	Training	0	0.197	0.98	3	0	3	0.33	8.48382	0.138889	2.03287	364.98	4.4311	8.3832	6.3404	0.0512	-2.434
320	Training	0	0.347	1.068	0	0	0	1	0.210314	0.170103	1.96315	199.28	2.6876	4.2934	4.5855	0.0488	0.3476
324	Training	0	0.014	1.08	1	0	2	0.17	0.350346	0.219416	1.65051	372.83	4.6883	5.6711	6.31	0.0404	0.757
328	Training	0.714	0.059	1.057	1	2	2	0.33	0.00013456	1.00957	1.52881	331.4	3.5519	5.5204	5.9693	0.1784	0.5749
330	Training	0	0.163	1.17	1	0	0	1	1.32964	0.185395	2.2149	232.36	3.1239	4.3428	4.8091	0.0306	0.5496
332	Training	0	0.058	1.243	1	0	0	0.67	0.667979	0.0680414	1.68055	283.83	3.5765	4.3775	4.7261	0.0177	0.4082
333	Training	0.184	0.215	1.229	4	0	1	0.33	7.89891	0.467775	1.98993	370.53	5.6369	7.3435	6.1311	0.067	-1.4567
334	Training	0.045	0.071	1.276	4	0	3	0.33	0.697392	0.391873	1.69771	373.49	3.5421	5.1673	5.7903	0.0464	0.7403
339	Training	0.189	0.035	1.104	0	1	3	0.33	3.60278	0.185395	2.07507	307.86	3.6322	4.9652	5.7145	0.0399	0.8875
342	Training	0.13	0.423	1.166	1	1	0	0.67	2.97114	0.126967	1.62076	228.36	1.4332	3.2032	4.0253	0.0482	0.978
345	Training	0	0.411	1.174	4	1	0	0.83	1.23565	0.0453609	1.76821	216.69	1.008	3.6711	3.3691	0.0916	-0.3677
346	Training	0	0.355	1.295	0	2	0	0.5	0.714194	0.0680414	2.02326	229.75	2.7407	4.8297	4.1742	0.0524	-0.7816
350	Training	0	0.33	0.847	1	2	0	0.67	0.00112225	0.102062	0	160.22	0.4009	3.1365	4.1133	0.0626	1.171
351	Training	0.288	0	1.265	6	0	2	0.17	0.953162	1.28805	2.00848	331.45	3.4492	7.9522	8.1641	0.2205	0.2786
353	Training	0.13	0.057	0.854	1	0	0	0.67	1.78436	0.25	0	252.75	2.6236	3.9226	5.2638	0.0249	1.5764
354	Training	0.189	0.026	1.104	2	0	0	0.17	9.18999	0.128694	1.00058	396.42	4.9252	5.0667	5.8342	0.0623	0.92
356	Training	0	0.035	0.948	1	0	0	0.67	3.74616	0.0833333	2.06059	257.81	3.7266	5.3505	5.6783	0.0241	0.3851
358	Training	0	0	0.833	4	4	0	0.17	2.5664	0.0833333	1.31199	342.44	2.7154	4.4931	4.9844	0.1502	0.6185
360	Training	0.298	0.02	0.746	0	0	0	0.67	0.190532	0.321478	0	228.29	3.0986	6.5519	5.19	0.0514	-1.6229
361	Training	0	0.16	1.19	0	0	0	0.33	9.83199	0.0555556	1.73283	301.14	4.1259	5.5867	6.142	0.0417	0.6584
364	Training	0	0.013	1.573	0	0	0	0.83	0.361441	0.0833333	1.54851	214.32	1.8152	3.7869	4.2055	0.0527	0.4992
367	Training	0	0.333	0.901	3	0	0	0.5	5.79461	0	2.13552	304.69	3.96	5.4047	5.1309	0.0726	-0.33
369	Training	0	0.186	0.874	0	0	0	0.33	0.00133956	0	2.30388	314.57	5.8689	5.4257	5.544	0.0638	0.1419
370	Training	0	0.274	1.533	0	0	0	0.67	1.53314	0	1.37253	257.44	0.7531	5.35	3.8432	0.0322	-1.7775
372	Training	0	0.241	0.859	0	3	0	0.67	0.944201	0.0680414	0	229.47	2.0847	4.8836	4.1523	0.0729	-0.8814
374	Training	0	0.332	1.729	0	0	0	0.67	3.06635	0.166667	1.97278	285.98	2.5157	3.605	4.2999	0.0523	0.8285
375	Training	0.13	0.051	0.844	0	0	0	0.83	6.13751	0.142259	2.0207	247.54	2.6664	5.1922	5.7654	0.045	0.6808
376	Training	0.06	0.028	0.821	0	1	0	0.5	12.9751	0.2804	0	437.17	5.5792	7.1142	6.9801	0.068	-0.1612
378	Training	0.257	0.019	1.212	2	0	2	0.33	11.4691	0.957439	1.12565	385.39	4.0051	8.5067	8.4227	0.1204	-0.104
True external set
ID	SM5_X	VE1sign_B(m)	GATS1p	NdssC	CATS2D_04_DA	CATS2D_09_AL	LLS_01	ALogp2	SCH-6	minsCH3	MW	ALOGP	Predicted pLC50	HAT i/i (h*=0.1746)
4	0.0598981	0.0374349	0.995866	1	0	0	1	0.310583	0.328567	2.17018	207.32	2.9099	5.4739	0.0417
6	0.143512	0.0384171	1.47596	4	0	19	0.333333	1.1844	0.539749	1.65429	746.1	4.9172	6.5923	0.483
7	0	0.366582	1.86907	0	1	0	1	0.611368	0	1.48236	91.13	-0.7819	2.4305	0.0802
10	0	0.0860426	1.12417	1	0	3	0.5	1.03571	0.0680414	2.23251	333.28	6.012	5.4178	0.0244
14	0	0.160092	0.950018	1	1	0	1	0.510082	0.0833333	1.42565	136.16	1.3025	4.3274	0.025
19	0.231442	0.057581	0.997298	1	1	3	0.5	1.78249	0.503964	2.13145	317.85	3.3974	6.2428	0.0342
22	0.0598981	0.0777344	0.987243	3	0	1	0.666667	0.142808	0.291258	2.25384	282.26	4.543	5.5038	0.0343
23	0	0.145489	0.913695	0	1	0	1	0.56235	0.102062	0	94.13	-0.0672	4.2932	0.0346
27	0	0.0209691	1.23308	5	0	4	0.166667	12.6004	0.12037	1.25337	384.56	6.6944	6.3878	0.1469
28	0	0.0427917	1.11382	1	0	0	0.833333	0.0997296	0.0833333	1.81843	222.7	1.6036	4.7598	0.0211
30	0.768907	0.288002	1.17158	6	3	21	0.166667	0.118611	0.423963	1.78968	593.73	2.1505	3.5769	1.073
34	0	0.20522	1.01857	0	0	0	1	0.0414122	0	0	110.55	-0.2045	3.848	0.0369
35	0	0.0908913	1.65445	0	0	0	0.5	19.8836	0	0.557319	527.24	4.6484	5.8539	0.2107
37	0.0598981	0.472938	1.50143	3	2	0	0.666667	0.214369	0.247857	1.81819	241.34	0.7644	3.3083	0.0936
40	0	0.274908	1.17412	0	0	2	0.666667	4.37061	0.136083	1.9306	293.45	5.4133	5.3921	0.0261
42	0	0.011207	1.36722	4	2	10	0.333333	7.07507	0.0680414	1.4427	548.7	4.309	5.3017	0.2493
50	0	0.00599911	1.5	0	0	0	0.5	14.5496	0	2.28908	322.69	10.4196	6.1014	0.1243
51	0.204032	0.101745	0.829925	3	2	2	0.5	2.5173	0.707757	1.53978	398.26	4.1266	6.5818	0.067
55	0	0.0178926	1.14877	1	1	4	0.5	0.254016	0.170103	1.57851	300.39	3.6794	5.4425	0.033
56	0.189242	0.0624212	1.12504	0	1	7	0.166667	1.07495	0.268729	1.96176	337.46	4.101	6.066	0.0718
60	0	0.0982071	0.735898	3	2	4	0.166667	0.0145926	0.397423	0	527.43	6.6328	6.2731	0.0848
61	0	0.108179	0.542851	0	0	10	0.166667	27.0421	0.111111	1.3658	577.94	6.5623	9.8298	0.3979
66	0	0.0235863	1.78384	0	0	1	0.833333	1.57904	0	1.71296	190.32	1.4639	3.7837	0.0805
75	0.040328	0.0518519	0.806178	0	0	0	0.5	8.89948	0.307317	1.72872	407.63	5.665	7.3258	0.0447
78	0	0.165376	0.940726	1	0	0	1	0.0598292	0.0833333	1.51798	200.63	2.525	4.5272	0.0214
83	0	0.0874001	0.943088	0	0	0	1	0.0284597	0.102062	0	132.17	1.9496	4.5083	0.0338
85	0.130053	0.297753	0.774505	1	5	2	0.5	0.300852	0.201184	1.59502	249.71	1.3125	4.2858	0.1718
87	0	0.333062	1.19762	0	2	1	0.5	0.193864	0.0680414	1.77629	240.73	2.3359	4.3056	0.0469
88	0.0598981	0.0904951	1.35309	0	0	1	0.5	0.00107584	0.302101	1.50057	324.82	3.0686	5.4239	0.0304
89	0.5136	0.0465124	0.655276	2	2	6	0.166667	4.29401	0.414266	2.06993	602.13	5.9867	6.0776	0.1662
93	0.143512	0.0387423	1.47638	4	0	19	0.333333	0.702076	0.539749	1.66818	760.13	5.266	6.5455	0.481
99	0.485508	0.324318	1.14927	0	3	0	0.5	6.48517	0.234708	0	166.22	0.3139	3.3716	0.1713
100	0	0.122477	1.64485	2	0	0	0.5	0.344804	0	1.66534	160.2	-0.6908	3.8037	0.0464
102	0	0.226514	0.384317	1	1	0	0.833333	0.828646	0	0	241.87	0.7031	4.7456	0.0583
104	0	0.0549917	1.57642	0	0	1	0.666667	7.29756	0	2.24183	158.32	3.7079	4.9828	0.0647
106	0	0.21505	1.39435	0	0	0	0.333333	6.34133	0.0680414	1.95621	304.39	3.1366	5.4668	0.0364
112	0	0.0594717	0.802394	1	0	0	1	0.977923	0.0680414	1.54391	235.07	3.1894	4.9677	0.0286
113	0	0.0652932	1.87549	1	0	0	0.666667	1.0675	0	1.34855	220.98	0.4737	3.4594	0.0796
116	0.0885534	0.150771	1.16902	0	1	8	0.166667	0.9994	0.295306	1.70834	406.25	4.0695	6.2454	0.0762
117	0.0598981	0	0.904762	8	0	0	0.666667	32.943	0.611111	0	474.6	5.7376	8.8512	0.6959
128	0	0.234696	1.1999	0	3	0	0.333333	5.69777	0.0453609	1.56033	322.28	2.6743	4.8503	0.066
129	0	0.147646	1.24286	1	0	11	0.166667	1.73712	0.0555556	1.61386	364.44	5.9616	5.8824	0.1524
130	0.040328	0.199685	0.830541	3	0	0	0.5	1.16813	0.543516	0	340.39	4.0852	6.2165	0.0831
131	0	0.0106781	1.40951	2	0	4	0.5	0.39993	0.0833333	1.91026	251.31	2.5637	4.914	0.0477
133	0	0.0273337	0.959843	2	0	0	0.333333	13.9487	0.0453609	1.59133	401.46	5.4043	6.7734	0.0773
135	0	0.254413	1.51785	2	7	8	0.333333	0.598612	0.136083	1.07475	492.49	3.2712	3.2501	0.4138
138	0.0598981	0.0141798	0.579451	0	1	0	0.666667	5.50137	0.302101	0	349.54	5.2589	6.4749	0.0373
140	0.034133	0	1.08021	2	0	0	0.333333	5.11664	0.599595	0	422.92	2.2374	7.1405	0.0832
143	0	0.0938552	0.962097	1	0	9	0.333333	0.647864	0.268729	1.98392	419.93	6.6715	6.7822	0.091
148	0	0.142001	1.08814	0	0	0	0.666667	0.846768	0	2.02018	242.38	3.2319	4.8465	0.0208
150	0.189242	0.147773	0.675909	1	0	0	1	0.0867892	0.144338	0	102.18	0.0874	4.2269	0.0461
152	0.130053	0.0338468	1.16386	1	0	1	0.5	6.919	0.272166	1.91876	359.45	5.5205	6.1398	0.0264
160	0.0885534	0.0548278	1.1078	1	0	4	0.166667	0.191669	0.355499	1.64492	361.8	4.7523	6.4708	0.0335
161	0.0885534	0.0548278	1.1078	1	0	4	0.166667	0.191669	0.355499	1.64492	361.8	4.7523	6.4708	0.0335
163	0.246254	0.155714	1.1021	1	0	9	0.333333	1.73212	1.12179	2.05023	349.46	4.8113	8.6987	0.1682
167	0	0.0938552	0.962097	1	0	9	0.333333	0.647864	0.268729	1.98392	419.93	6.6715	6.7822	0.091
169	0	0.111601	1.28693	1	0	2	0.333333	0.00638401	0.166667	1.58811	383.4	5.3313	5.3737	0.0242
177	0.0885534	0.0754461	1.29387	0	1	1	0.5	0.226195	0.320278	1.71629	325.33	2.5106	5.3674	0.029
181	0.130053	0.0492602	1.09899	2	0	1	0.666667	1.01748	0.269226	0	288.7	1.9789	4.7898	0.0376
186	0.189242	0.171954	0.961515	0	1	0	0.333333	0.057121	0.268729	0	301.32	2.7194	4.9884	0.0575
189	0.040328	0	0.724312	2	0	0	0.833333	8.59252	0.347716	0	296.56	4.4497	6.4992	0.0522
192	0	0.11865	0.938417	4	2	1	0.166667	0.535824	0.230756	1.46791	308.35	2.6622	5.4457	0.0722
196	0	0.443485	1.82968	1	0	0	0.333333	1.87224	0	0	169.09	-2.0671	3.1177	0.1494
198	0	0.0586838	1.01239	1	0	2	0.166667	1.41277	0.151375	1.39651	361.72	4.416	6.1631	0.0347
201	0	0.262073	0.859049	2	1	1	0.166667	9.87028	0.123597	0	461.16	5.6148	6.0818	0.0684
203	0	0.0773844	1.59115	3	0	0	0.666667	4.08323	0.147423	1.65618	252.36	2.601	4.467	0.0586
204	0.0598981	0.0594932	0.931851	2	1	1	0.333333	0.191669	0.433252	2.04548	352.92	4.8921	6.4394	0.04
206	0.130053	0.353914	1.17668	2	0	0	1	0.189312	0.235702	1.70625	99.1	-0.432	3.8564	0.0511
208	0.0598981	0.14107	1.34299	1	7	5	0.333333	0.371612	0.380337	1.39043	412.85	2.1859	4.3933	0.3472
210	0.0885534	0.0570483	0.965922	1	0	2	0.833333	0.724201	0.287457	0	203.26	2.6751	5.124	0.033
215	0.485508	0.331613	1.12974	0	2	0	0.333333	0.0672365	0.234708	2.11104	253.42	3.0889	3.6757	0.1313
216	0	0.153401	1.30452	1	0	0	0.333333	0.387755	0.0833333	1.83486	345.44	3.7014	4.9848	0.0304
220	0.257127	0.162887	0.993976	2	0	9	0.333333	4.86467	1.08288	1.72596	449.88	5.8977	8.7833	0.1485
222	0	0	0.530397	0	0	0	0.833333	17.3339	0.037037	0	290.82	4.1574	7.0549	0.1303
224	0	0.0628309	1.14588	2	0	0	0.333333	3.85769	0	1.6837	330.4	1.8946	5.2698	0.0314
227	0	0.134172	1.43916	2	0	0	0.666667	0.090601	0.0680414	1.30805	279.37	2.3766	4.0035	0.0288
229	0	0.0592648	1.18612	3	0	4	0.333333	0.667979	0.136083	1.02488	339.35	0.8339	5.2608	0.0467
230	0	0.0373296	0.973398	2	0	3	0.166667	6.34435	0.25	0	506.44	7.2123	6.6733	0.0503
233	0.231442	0.0424049	1.04911	0	1	3	0.333333	1.61595	0.503964	2.17229	319.87	3.5799	6.5522	0.0445
238	0	0.147833	1.19875	2	0	2	0.333333	2.6837	0.136083	1.56456	368.52	4.451	5.4654	0.0185
240	0	0.798318	0.588193	0	0	0	1	0.982279	0	2.2338	94.94	0.9911	4.1473	0.3023
241	0.143512	0.0827357	1.49843	3	0	17	0.333333	3.18444	0.562429	1.67524	748.12	5.2642	6.8099	0.3667
243	0	0.334492	1.54353	1	0	1	0.666667	4.76898	0	1.67766	170.33	3.6163	4.0333	0.0388
250	0.0671393	0.0550391	1.27755	4	3	21	0.333333	0.19616	0.395619	1.76313	542.78	4.3701	6.0045	0.6806
252	0.143512	0.0873603	1.47552	3	0	17	0.333333	3.26344	0.562429	1.65017	732.07	4.4708	6.8403	0.3651
253	0.182836	0.0344564	0.985161	3	0	0	1	0.00748225	0.419621	1.9703	155.24	1.1171	5.0422	0.0594
254	0.271934	0.0384143	1.32055	0	0	0	1	0.176736	0	0	69.08	-0.41	2.803	0.109
256	0.130053	0.0320011	1.00592	0	2	2	0.666667	0.687573	0.321478	0	225.28	1.6937	5.0196	0.0566
258	0	0.0703329	1.2116	1	0	0	0.666667	0.0358345	0.151375	1.80796	271.39	3.2762	5.0079	0.0173
260	0	0.450453	1.34722	2	0	1	0.666667	13.7004	0	1.79797	222.41	4.562	4.931	0.1241
264	0.130053	0.0537483	1.55913	1	0	0	1	0.599231	0.235702	1.84259	99.15	-0.1649	3.9788	0.0565
267	0	0.111154	0.889503	2	1	1	0.166667	20.657	0.113402	0	529.16	6.7439	7.3421	0.1525
269	0	0.184105	1.49161	1	0	0	0.5	0.00492804	0	1.40784	213.22	-0.3334	3.9941	0.0311
271	0	0.108888	1.54913	2	9	4	0.333333	4.4016	0.151375	1.36096	424.49	1.1569	3.3016	0.592
274	0.130053	0.151068	1.38941	2	0	0	0.666667	0.112091	0.253934	1.44751	278.34	1.9155	4.3059	0.0236
276	0.315081	0.168213	1.01267	2	0	1	0.166667	1.2769	0.635919	1.49247	539.58	4.7467	6.4329	0.0625
281	0	0	0.574545	0	0	0	0.833333	2.21593	0.0833333	0	147	3.1588	5.6144	0.0345
286	0	0.121809	0.221106	0	0	0	0.833333	19.1984	0.037037	0	295.32	5.0464	7.5248	0.1634
289	0.257127	0.199318	0.927013	2	0	6	0.5	3.43472	1.12573	2.15873	391.31	5.4387	8.5469	0.1524
290	0	0.182877	1.53663	1	0	2	0.666667	1.11366	0	1.45276	240.43	5.011	3.9277	0.0315
298	0	0.0123101	1.06595	1	0	2	0.5	0.0866714	0.151375	2.30033	330.28	4.51	5.7825	0.0286
300	0	0.277492	1.44216	0	0	0	0.333333	4.679	0.0680414	1.66495	305.38	2.7347	5.0518	0.041
305	0	0.135015	0.773251	1	0	0	0.833333	0.883412	0.0680414	1.86193	218.09	2.9461	5.1769	0.0268
313	0	0.085106	1.16546	2	0	0	0.666667	0.920448	0.170103	1.82543	217.26	-0.2184	5.0652	0.0177
315	0.0598981	0.07111	1.08862	1	0	2	0.166667	7.61539	0.313607	1.4494	413.2	5.144	7.0229	0.0279
317	0	0.138626	0.900339	1	0	6	0.333333	11.0191	0.138889	0	491.13	6.509	6.7932	0.0877
318	0	0.128931	0.974202	1	0	4	0.166667	0.0128822	0.170103	2.23107	378.96	7.1551	6.3266	0.0479
321	0	0.0885009	1.11765	0	0	1	0.333333	0.20232	0.287457	1.946	321.4	4.772	6.2859	0.0442
322	0	0.00979187	0.592117	1	1	0	1	1.5595	0.123597	0	242.06	2.9495	5.0502	0.041
326	0	0.24069	1.53076	1	6	3	0.333333	1.51044	0.151375	1.33768	431.5	1.1487	3.5619	0.2441
327	0.0885534	0.0666345	1.15107	2	0	6	0.5	0.0233173	0.39118	1.57065	394.45	3.9307	5.977	0.0403
331	0	0.232615	1.25432	0	2	0	0.5	0.0269616	0.0680414	2.01935	201.69	2.1582	4.3718	0.0409
335	0.0990909	0.428992	1.57822	0	0	3	0.666667	1.02151	0.288675	2.23192	297.54	3.7831	4.4887	0.0656
343	0.257127	0.0456069	1.0623	2	0	0	0.5	25.548	0.943348	0.850349	418.76	5.673	9.5897	0.3283
344	0	0.0451531	1.19121	3	0	5	0.333333	0.0548028	0.123597	1.046	440.85	2.4153	5.2293	0.0586
347	0	0.321869	1.20353	0	2	0	0.5	1.53363	0.0680414	2.03749	241.41	2.948	4.459	0.0471
348	0	0.0712131	1.49116	1	0	0	0.333333	7.04531	0.0555556	1.3895	365.96	3.5293	5.3047	0.0453
349	0.189242	0.10867	1.00217	0	0	1	0.333333	7.09583	0.170103	0	372.17	4.0338	5.6775	0.0502
357	0	0.00138723	1.1283	4	0	8	0.333333	4.41924	0	1.61211	354.53	2.1022	5.5638	0.1527
362	0.0598981	0.00424556	1.01149	1	1	0	0.333333	0.237949	0.424718	1.83002	383.91	5.2232	6.4275	0.0485
363	0	0.0114739	1.23512	0	0	0	0.333333	7.84896	0.0833333	1.55892	347.29	5.4692	6.1681	0.043
365	0.245122	0.162063	0.645319	1	0	10	0.333333	12.2892	1.27551	2.22797	665.02	7.0336	11.0906	0.291
368	0.0885534	0.183686	1.32449	2	0	2	0.333333	3.18087	0.171709	1.67237	314.46	2.6366	5.1235	0.0203
371	0	0.203183	1.15567	3	0	0	0.666667	3.54833	0.037037	0	232.41	1.1076	4.125	0.0592
373	0	0.0336331	0.678559	1	0	0	0.833333	2.03519	0.0555556	0	256.47	3.074	5.1353	0.0286
377	0	0.880837	0.500624	0	0	0	1	2.3177	0	2.24378	141.94	1.5224	4.2841	0.3794

## Sheet: Table S4-D-Rnd
Table S4. Descriptor values, experimental and predicted pEC50 values, hat values and standardized residuals of all training, test, and true external compounds of the D-Rnd model
Modeling data set
ID	Status	NRS	MATS1m	SpMin1_Bh(s)	C-026	CATS2D_03_AA	SCH-6	VP-2	minHBint2	minHCsatu	XLogP	MW	ALOGP	Experimental pEC50	Predicted pEC50	HAT i/i (h*=0.1728)	Std.Pred.Mod.Eq. Res.
2	Training	1	0	1.09853	0	0	0.0833333	1.86462	0	0	2.52	134.14	1.3488	6.1733	4.1001	0.0255	-2.2698
3	Test	1	0.066	1.076	1	0	0.315641	2.87748	4.97535	0	1.905	151.2	1.3753	4.8293	4.6945	0.0466	-0.1492
5	Training	1	0.0802884	1.26428	0	0	0.0680414	3.38541	0	0	1.239	171.33	1.4094	3.9188	3.8917	0.0244	-0.0296
7	Training	0	-0.0788968	1.02584	0	1	0	1.10486	0	0	-1.534	91.13	-0.7819	3.5582	3.2564	0.0523	-0.335
8	Training	1	-0.0218639	1.03822	3	2	0.0680414	3.10079	8.00935	0.846981	1.926	221.04	2.8119	3.9465	3.3851	0.0922	-0.6368
9	Training	1	0.0148867	1.24309	3	3	0.0680414	4.89345	0	0.874758	3.407	321.22	4.2607	4.6494	4.6697	0.0527	0.0225
10	Training	1	0.0112223	1.39321	3	2	0.0680414	6.17071	0	0.846981	5.812	333.28	6.012	6.7903	5.5161	0.0559	-1.4174
11	Training	1	0.00865898	1.05721	3	2	0.0680414	4.24567	0	0.846981	3.13	263.13	3.7892	5.0052	5.0064	0.0435	0.0014
12	Training	1	-0.0122386	1.19598	3	0	0.0680414	3.76413	7.61539	0.61219	2.442	249.1	3.1679	3.9932	3.8633	0.0872	-0.147
13	Training	2	-0.0102352	1.23749	2	0	0.170103	3.87185	0	0	5.517	218.69	4.2016	5.569	5.2055	0.0265	-0.3981
14	Training	1	-0.0406	1.07817	1	0	0.0833333	2.07334	0	0.527361	1.975	136.16	1.3025	3.4564	3.8895	0.0307	0.4754
15	Training	0	0.0423511	1.40046	0	0	0	4.32849	0	0	4.098	190.39	3.4093	5.7114	5.1815	0.0445	-0.5859
16	Training	1	0.0978668	1.07577	1	0	0.351579	3.56019	0	0	2.047	165.23	1.5812	5.2542	5.6658	0.0238	0.4502
17	Training	1	0.0200245	0.9652	0	1	0.260491	2.06806	1.09211	0	0.619	126.18	0.3509	3.5999	4.1994	0.0304	0.658
19	Test	3	0.023	1.322	1	1	0.503964	6.99478	0	0.475194	3.039	317.85	3.3974	4.6213	4.675	0.0397	0.0592
20	Training	0	-0.00140057	1.25445	0	0	0	2.66711	2.38375	0.765597	2.729	281.11	2.2675	5.7022	3.7161	0.0486	-2.2007
21	Training	1	-0.0609318	0.499566	0	0	0.288675	3.54841	0	0	1.587	187.07	2.3891	8.0168	6.349	0.1238	-1.9256
22	Training	1	0.0387201	1.39937	0	0	0.291258	5.86563	0	0	4.927	282.26	4.543	7.7329	5.8786	0.0322	-2.0372
24	Test	1	-0.021	1.164	2	0	0.0555556	2.77151	0	0	2.153	156.62	3.1994	4.3083	4.5841	0.0221	0.3013
25	Training	1	-0.0250452	1.10624	2	0	0.0680414	2.34069	0	0	2.041	142.59	2.7132	4.7923	4.5869	0.0228	-0.2246
27	Test	1	0.026	1.441	0	1	0.12037	7.53713	0	0.623644	8.405	384.56	6.6944	7.4235	6.1819	0.0653	-1.388
29	Training	1	0.0534592	1.13519	0	0	0.219416	3.9515	0	0	2.157	210.3	2.4168	4.8604	5.0033	0.014	0.1555
31	Training	0	0.0697691	1.11488	0	1	0	4.13127	2.69692	0	1.684	190.3	1.1675	5.4368	4.7597	0.0249	-0.7411
32	Training	0	0.252628	1.29121	0	1	0	3.88678	2.66902	0	0.463	222.3	0.1517	5.8997	4.1394	0.0637	-1.9662
34	Training	0	-0.061569	1.06687	0	1	0	1.29931	0	0	-0.406	110.55	-0.2045	2.0559	3.5438	0.0429	1.6438
35	Training	0	0.0167191	1.0804	0	0	0	5.91344	7.95287	0	7.01	527.24	4.6484	6.1538	6.3326	0.1376	0.2081
36	Training	1	0.0719668	1.09996	0	0	0.0680414	4.07209	0	0	1.806	227.38	2.743	3.9095	4.6703	0.0158	0.8289
37	Training	1	0.0280457	1.15687	0	2	0.247857	5.25743	0.311392	0.588125	1.073	241.34	0.7644	3.7719	4.3478	0.0281	0.6314
39	Test	2	0	0.941	1	2	0.191638	3.77345	0	0	0.828	227.67	1.5056	4.0289	4.157	0.0396	0.1413
41	Training	2	-0.0135585	1.06015	2	0	0.151375	3.88525	0	0	3.318	275.53	4.3922	5.4296	5.0049	0.0211	-0.4639
45	Training	1	0.0282545	1.08556	0	1	0.333333	3.75575	0	0	1.028	241.48	0.9231	5.2068	4.8773	0.0238	-0.3604
46	Test	1	0.057	1.028	3	1	0.341746	3.82688	3.00177	0	2.129	223.25	1.4788	6.8834	5.8793	0.0366	-1.1055
48	Training	1	0.0402249	1.2559	0	0	0.295361	4.4616	0.586888	0	3.052	290.36	2.9654	5.9293	5.2176	0.0191	-0.7766
51	Test	2	0.007	1.365	1	0	0.707757	7.51265	5.20748	0.557298	4.133	398.26	4.1266	6.6707	5.7778	0.0783	-1.0051
53	Test	3	0.012	1.123	3	1	1.10161	8.34	0	0.556868	6.868	434.31	5.6169	9.4794	8.6581	0.0903	-0.9307
54	Training	2	0.113642	1.14479	0	1	0.358305	5.34667	0	0	1.914	251.35	2.3965	5.3954	4.8846	0.0253	-0.5592
55	Test	2	0.04	1.191	2	0	0.170103	4.98515	2.99031	0	6.258	300.39	3.6794	6.0938	5.5976	0.0278	-0.5439
56	Training	3	0.0523642	1.29473	1	3	0.268729	7.08517	0	0	6.289	337.46	4.101	4.683	5.1728	0.062	0.5465
57	Training	3	0	1.19211	4	0	0.343419	6.4897	6.13717	0	4.654	414.23	5.1938	5.5758	5.454	0.0736	-0.1368
59	Training	1	-0.000542289	1.23683	0	0	0.0453609	4.09456	0.629239	0.49419	1.497	261.14	1.4107	3.3341	3.6449	0.0322	0.3415
60	Training	4	-0.00253216	1.355	2	0	0.397423	9.40731	0	0.869042	10.917	527.43	6.6328	5.4211	6.545	0.0876	1.2716
61	Test	2	0	1.194	7	1	0.111111	7.83895	0	0	6.917	577.94	6.5623	8.2129	8.0765	0.1029	-0.1556
62	Training	1	0.00248346	1.10182	0	0	0.102062	3.16479	0	0	5.093	228.05	2.9349	6.9778	5.2628	0.0327	-1.8846
63	Training	1	-0.00855232	1.05359	3	0	0.0555556	3.60898	0	0	2.049	276.91	2.9383	4.1586	5.3941	0.0274	1.354
65	Training	0	-0.0178196	1.06869	0	2	0	3.29366	0	0	-0.701	200	0.0568	5.0969	4.0199	0.0457	-1.1915
67	Training	1	0.0441769	1.30611	3	0	0.0555556	6.1618	0	0	6.893	295.38	4.0779	6.4058	6.969	0.0454	0.623
68	Training	0	0.0623228	1.29989	0	0	0	5.60686	0	0	2.882	217.42	3.5135	4.2617	5.5423	0.0301	1.4053
71	Test	1	0.025	1.097	0	0	0.287457	2.71914	1.2915	0	2.034	191.21	1.6508	5.8292	4.6552	0.023	-1.2837
72	Training	1	0.0514814	1.22669	2	1	0.341746	4.42245	2.94479	0	2.483	221.28	2.2344	6.8825	5.392	0.0322	-1.6374
73	Training	2	0.0630196	1.10521	1	0	0.185395	4.50756	5.31681	0.505802	3.187	235.33	1.4139	3.4453	3.9571	0.0545	0.5689
75	Training	2	0	1.13097	2	0	0.307317	5.78202	0	0	5.157	407.63	5.665	6.8144	6.3581	0.0163	-0.4972
79	Training	1	0	1.04697	4	0	0.037037	3.74139	0	0	1.876	265.9	4.2454	6.6323	5.6467	0.0415	-1.088
80	Training	1	0.00498636	1.06331	2	0	0.0833333	3.52585	2.60182	0	3.192	213.68	2.9843	4.7615	5.1654	0.0177	0.4404
81	Training	1	0.15863	0.984586	2	0	0.0555556	7.02948	0	0	4.216	350.6	4.5994	8.5858	7.1996	0.0448	-1.5329
82	Training	1	0.144489	0.900134	2	0	0.0555556	6.77298	0	0	3.37	322.54	3.9018	8.4632	7.0817	0.0534	-1.5346
85	Training	1	0.00903673	0.965775	0	0	0.201184	4.01622	1.23989	0	1.587	249.71	1.3125	3.5912	5.0481	0.0238	1.5936
87	Training	1	0.00453521	1.05032	0	0	0.0680414	3.98185	0	0	0.781	240.73	2.3359	3.7234	4.4046	0.0279	0.7467
88	Training	2	0.171812	1.17976	0	2	0.302101	5.46209	0	0	2.525	324.82	3.0686	5.8957	4.7879	0.0388	-1.2211
89	Training	4	-0.00335398	1.17064	4	2	0.414266	9.94725	3.77155	0	5.479	602.13	5.9867	6.8712	6.2517	0.0889	-0.7015
90	Test	1	0.08	1.487	0	0	0.102062	4.99204	0	0	2.977	215.4	3.337	3.953	4.4109	0.0368	0.5042
91	Training	3	0.0174901	1.16459	2	0	0.25968	6.67127	7.36644	0.852014	7.461	412.39	4.9877	4.0713	4.7974	0.1112	0.8325
93	Training	3	0.0841608	1.48772	0	6	0.539749	17.1856	0	0.462238	4.646	760.13	5.266	6.9458	7.1981	0.2942	0.3246
94	Test	0	0.003	0.991	0	2	0	2.04785	1.06881	0	0.175	198.21	-0.4435	3.8499	3.9518	0.0398	0.1124
95	Training	3	0.0144795	1.13144	2	1	1.1169	8.22263	0	0.541868	6.909	416.32	5.4114	8.9662	8.3891	0.0904	-0.654
96	Training	3	0.0472436	1.13158	2	1	1.1169	8.00247	0	0.387442	6.824	375.5	5.5193	8.6108	8.4527	0.0925	-0.1794
97	Test	3	0.023	1.348	1	1	0.375767	6.08675	0	0	3.239	291.81	2.9175	4.0501	4.4074	0.0399	0.3941
98	Training	3	0.0609249	1.07478	1	0	0.306186	4.5231	0	0	4.176	225.32	3.4454	6.8476	4.8505	0.0397	-2.2027
100	Training	0	-0.0304385	1.10353	0	1	0	2.32315	5.88263	0.656597	-1.139	160.2	-0.6908	3.2111	2.4322	0.0774	-0.8765
101	Training	1	0.0542191	1.088	0	0	0.0680414	3.81347	0	0	0.779	162.31	1.6021	4.1348	4.3154	0.0218	0.1974
102	Training	0	-0.0334627	0.528269	0	0	0	4.49359	6.39739	0	0.209	241.87	0.7031	5.4293	5.5328	0.1738	0.123
103	Training	2	0.000106667	1.27372	2	0	0.166667	7.31954	0	0	7.02	354.48	6.3311	7.8775	6.6415	0.0295	-1.356
104	Training	0	-0.0720165	1.4193	0	0	0	3.19848	0	0	4.265	158.32	3.7079	4.3858	4.6699	0.0699	0.3183
105	Training	3	0.00110468	1.13144	2	1	1.1169	9.98758	0	0.539167	7.261	505.22	5.6294	8.3949	9.0424	0.0965	0.7363
107	Training	0	-0.00235969	1.22645	0	0	0	3.94756	0	0.502616	1.366	265.94	1.9297	5.0823	4.3109	0.0351	-0.8488
108	Training	1	0	1.04345	2	0	0.0680414	2.52286	0	0	2.336	172.01	3.0377	4.4432	4.9157	0.0201	0.5159
109	Training	0	0.00142879	1.05318	0	0	0	3.21753	0	0.478488	1.733	208.1	2.003	3.169	4.6311	0.0313	1.6055
111	Training	1	0.0521591	1.08181	0	1	0.333333	3.38454	0	0	0.69	197.03	0.8141	5.6224	4.7054	0.0257	-1.004
113	Training	0	0.127071	0.684036	0	0	0	2.79271	0	0	1.207	220.98	0.4737	4.4033	5.8055	0.0652	1.5674
114	Test	2	0.014	1.071	5	2	0.151375	5.27509	0	0.885607	4.661	341.2	5.0006	6.1713	5.6889	0.0626	-0.5385
115	Test	1	-0.022	1.056	4	0	0.0555556	2.93188	0	0	1.845	207.02	2.3066	5	5.3733	0.0419	0.4121
116	Training	2	0.0717311	1.07704	3	6	0.295306	5.86869	5.32389	0	2.471	406.25	4.0695	3.7514	4.6659	0.1552	1.0753
120	Training	4	0.0422471	1.49015	1	0	0.452979	9.02414	0	0.806863	13.545	444.55	6.8965	5.8555	6.7663	0.1266	1.0533
121	Training	4	0.0268677	1.176	4	2	0.486593	7.12671	0	0	4.124	406.29	4.3809	5.7224	5.6196	0.0596	-0.1146
122	Training	4	0.00720387	1.49064	2	0	0.43425	11.1095	-0.43363	0.734782	12.901	539.51	8.6685	8.0885	7.5544	0.1034	-0.6096
124	Training	1	-0.0123577	1.25884	1	0	0.0833333	8.25095	0	0	4.312	422.03	2.4583	6.3823	6.5144	0.0529	0.1467
125	Training	1	0.316048	1.46329	0	0	0.0416667	3.87307	0	0.482227	-0.582	210.3	-0.374	4.0079	2.9113	0.1418	-1.2793
128	Training	1	0.0214807	1.21903	4	2	0.0453609	4.28281	0	0	3.957	322.28	2.6743	5.3942	5.7216	0.0532	0.3636
130	Training	3	0.0317974	1.27217	0	0	0.543516	6.36385	0	0.895343	7.467	340.39	4.0852	5.2767	5.4514	0.0622	0.1949
131	Training	1	0.0368409	1.13277	0	2	0.0833333	3.70395	0	0	2.466	251.31	2.5637	4.1449	4.3619	0.0296	0.2381
132	Training	0	0.384711	1.15669	0	0	0	10.1363	0	0	4.167	274.45	2.9527	7.3244	8.1234	0.1294	0.9254
133	Test	1	0.033	1.324	0	0	0.0453609	7.01187	0	0	5.887	401.46	5.4043	4.3731	6.0604	0.0345	1.8559
136	Training	3	0.0537121	1.13973	2	0	1.12573	7.73907	0	0.371269	7.228	350.49	5.5466	8.3685	8.6412	0.098	0.3103
137	Test	1	0.043	1.283	3	2	0.0555556	4.91658	0	0	4.845	335.32	4.4683	6.1257	5.7855	0.0492	-0.3771
138	Test	2	-0.004	1.109	2	0	0.302101	4.90987	0	0	4.548	349.54	5.2589	4.5368	5.947	0.0156	1.5362
139	Training	1	0.0164286	1.37222	0	0	0.599595	8.38204	0	0	0.839	406.92	2.1414	6.3894	6.4153	0.0904	0.0294
140	Training	1	0.0153166	1.37222	0	0	0.599595	8.41318	0	0	0.681	422.92	2.2374	6.1491	6.3813	0.0936	0.2635
142	Test	0	0.067	1.244	0	0	0	3.90123	0	0	2.288	189.36	2.8749	4.1684	4.9753	0.0232	0.8824
144	Training	2	0.0557629	1.07855	0	0	0.274972	6.20806	-0.524327	0.829762	2.082	320.48	2.9433	5.8285	4.6495	0.0758	-1.3255
148	Training	0	0.482804	1.2093	0	0	0	6.33055	0	0	2.627	242.38	3.2319	6.4159	6.4642	0.1519	0.0567
149	Training	1	0.0493918	1.27574	2	0	0.116154	4.81444	0	0.424028	3.078	217.34	3.2213	5.036	5.1317	0.0205	0.1044
150	Test	1	-0.016	1.03	0	0	0.144338	1.59093	1.27254	0	-0.085	102.18	0.0874	3.5795	3.4663	0.0324	-0.1244
152	Test	3	0.047	1.308	3	0	0.272166	7.29333	0	0	6.844	359.45	5.5205	7.7043	6.3324	0.0317	-1.5068
153	Test	4	0.053	1.168	3	1	0.578978	6.4591	0	0	7.471	374.42	4.7179	7.5015	6.4663	0.0567	-1.1518
154	Test	3	0.069	1.172	1	1	0.475716	5.92853	0	0	6.295	311.44	3.9764	6.4165	5.942	0.0371	-0.5226
155	Training	3	-0.00608851	1.23551	2	0	0.268729	5.66794	0	0	4.433	331.21	3.8275	4.7072	4.9817	0.0326	0.3017
156	Training	2	0.0623286	1.31072	0	0	0.234708	6.74136	0	0	7.847	306.44	5.216	7.7381	6.2873	0.0398	-1.6002
157	Training	3	0.0296241	1.36699	1	0	0.287457	6.2159	0	0	5.869	336.85	4.2953	5.1656	5.0376	0.0349	-0.1408
158	Training	2	-0.00855768	1.49608	4	0	0.143944	6.09159	3.97913	0	3.385	302.22	4.5551	5.4311	4.7168	0.0751	-0.8027
159	Training	1	0.377524	1.1402	2	0	0.0680414	6.28522	0	0	3.592	277.26	2.6915	7.4015	6.706	0.0994	-0.7921
160	Training	2	0.0343259	1.06477	3	2	0.355499	5.61385	0	0.90685	4.576	361.8	4.7523	5.056	5.7727	0.0394	0.7903
161	Training	2	0.0343259	1.06477	3	2	0.355499	5.61385	0	0.90685	4.576	361.8	4.7523	3.4581	5.7727	0.0394	2.5523
162	Training	2	0.0490052	1.08125	3	0	0.185395	4.38223	2.526	0	4.545	301.37	3.5582	5.8163	5.5937	0.0241	-0.2435
163	Training	3	0.0498143	1.1368	2	1	1.12179	7.81002	0	0.627857	6.645	349.46	4.8113	7.1072	8.1599	0.0936	1.1951
164	Test	2	0.054	1.384	0	1	0.151375	8.23208	0	0	7.143	303.54	4.8434	5.2517	6.0316	0.0434	0.8618
165	Test	3	0.072	1.157	1	1	0.453641	8.04972	0	0	6.915	421.54	4.8697	8.0685	6.7826	0.0348	-1.4146
166	Training	1	0.319705	1.14702	2	0	0.0680414	7.03209	0	0	4.072	278.36	3.3389	7.7285	6.988	0.0715	-0.8305
168	Training	2	0.139651	1.08354	0	2	0.151375	5.08845	1.09298	0	2.369	407.37	2.2162	3.3898	4.3116	0.0362	1.0147
169	Training	2	0.0347138	1.23947	2	2	0.166667	5.73747	0	0.918826	6.037	383.4	5.3313	3.1346	5.0039	0.0392	2.061
170	Training	2	-0.00798673	1.14515	5	0	0.113402	5.99957	0	0	7.502	465.11	5.7708	6.3687	7.3479	0.06	1.0915
171	Training	1	0.0263357	1.26117	3	2	0.0555556	4.98353	0	0	4.829	355.73	4.26	5.8029	5.8369	0.0471	0.0376
172	Training	2	0.00411995	1.11392	2	0	0.493121	3.69482	0	0	1.881	248.2	4.1234	5.4405	5.3173	0.0319	-0.1354
173	Training	1	0.00258424	1.26896	0	2	0.176777	4.86795	0	0.812626	1.015	291.72	1.5684	4.1225	3.5735	0.0434	-0.6067
174	Training	2	0.0377334	1.17199	2	3	0.225592	5.93353	0	0.982228	4.3	363.37	3.624	4.0648	4.7302	0.0435	0.7354
177	Training	2	0.179053	1.05182	3	5	0.320278	4.80333	7.25868	0	1.871	325.33	2.5106	3.1075	4.334	0.1651	1.4508
180	Training	4	0.0411798	1.0941	4	3	0.33677	6.53645	0	0	6.189	458.86	5.2654	5.8323	5.6874	0.0756	-0.1629
182	Training	3	0.0236376	1.19586	0	0	0.240951	5.52473	0	0	7.916	329.34	3.6448	4.7579	5.3967	0.0577	0.7112
183	Training	2	0.0073831	1.29559	1	0	0.185395	5.12042	0	0	3.641	312.32	4.2269	4.4512	4.738	0.0197	0.3131
188	Training	3	0.00888457	1.18552	4	0	0.346225	5.65596	6.65611	0	4.591	381.33	4.276	4.75	5.1398	0.0793	0.4391
191	Training	1	0.00961618	1.24309	2	3	0.0555556	5.19546	0	0.905323	2.992	356.65	4.5228	5.3217	4.3178	0.0475	-1.1117
192	Training	2	0.0159633	1.30916	1	0	0.230756	5.51737	0	0.551191	5.519	308.35	2.6622	3.6439	5.0459	0.0212	1.5316
193	Training	1	0.0328357	0.71863	0	1	0.102062	1.13327	0	0	1.057	96.09	0.9846	3.673	4.3704	0.0566	0.776
196	Test	0	0.211	1.034	0	0	0	2.05533	5.68387	0.74358	-2.679	169.09	-2.0671	3.101	2.5019	0.1438	-0.6997
197	Training	2	-0.00787396	1.12071	5	2	0.111111	4.97824	0	0	2.372	345.17	3.6815	5.2116	5.3985	0.053	0.2075
198	Test	2	-0.009	1.057	3	2	0.151375	5.08771	7.67642	0.918579	4.462	361.72	4.416	3.5729	4.1108	0.0873	0.6085
200	Training	0	-0.0108817	1.37499	0	0	0	5.20532	0	0.31342	7.387	280.5	5.935	5.6027	6.1127	0.0769	0.5737
202	Training	0	0.0648116	1.24551	0	0	0	4.14758	0	0	2.646	203.39	3.3986	4.6361	5.1448	0.0238	0.5563
203	Training	2	0.0738201	1.4817	0	0	0.147423	5.09223	0	0	1.592	252.36	2.601	3.2212	3.4165	0.0583	0.2175
204	Test	3	0.041	1.476	1	0	0.433252	7.78019	0.443055	0	4.136	352.92	4.8921	4.3021	5.1368	0.0496	0.9253
206	Test	1	0.034	0.847	0	1	0.235702	1.32336	7.69728	0.498264	0.008	99.1	-0.432	3.5075	2.8892	0.1053	-0.7065
207	Training	2	0.0150384	1.22653	2	1	0.170103	4.8796	0	0.648119	3.059	297.2	3.35	4.948	4.2809	0.0254	-0.7303
208	Training	2	0.116437	1.12078	0	2	0.380337	5.72919	1.29559	0	1.901	412.85	2.1859	4.1106	4.8333	0.0329	0.7942
209	Test	2	0.027	1.147	0	1	0.25	3.83557	0.882624	0	3.595	255.69	1.7669	3.4772	4.3562	0.0256	0.9623
210	Test	1	-0.005	1.292	0	0	0.287457	3.60679	7.45491	0.590013	2.395	203.26	2.6751	3.5521	3.3401	0.0913	-0.2404
211	Test	2	0.025	1.163	3	5	0.442034	7.98458	0	0	5.295	527.87	5.8264	6.9163	6.9797	0.1235	0.0732
212	Training	2	0.00586112	1.07402	3	1	0.359562	4.82023	0	0	2.873	286.12	3.6623	4.8942	5.8464	0.0215	1.0403
213	Test	3	0.027	1.406	1	1	0.434692	7.4761	0	0	4.463	333.9	4.0142	5.2932	5.2003	0.0369	-0.1023
214	Training	2	0.00413604	1.09851	3	1	0.315898	5.70258	0.418973	0.878608	2.312	330.19	2.8767	6.1385	5.0757	0.0507	-1.1789
215	Training	2	0.0796677	1.15905	0	0	0.234708	6.03633	0	0	2.343	253.42	3.0889	4.6795	4.9698	0.0283	0.3183
216	Test	1	0.312	1.139	1	0	0.0833333	8.37661	1.12079	0	5.909	345.44	3.7014	8.3342	7.5658	0.0777	-0.8647
217	Test	2	0.058	1.204	1	0	0.253934	7.90044	3.79999	0	4.416	359.53	4.7256	4.8836	5.8781	0.0397	1.0968
221	Training	2	-0.0168352	1.05653	6	1	0.136083	4.56892	0	0	4.009	289.54	5.116	5.8706	6.3394	0.0641	0.5237
223	Test	1	0.005	1.057	3	1	0.0680414	3.55348	0.585753	0	1.925	249.11	2.3269	5.3589	5.176	0.0227	-0.2
225	Test	2	0.022	1.234	3	2	0.151375	6.40219	4.84422	0.795509	3.947	411.91	5.8566	4.1291	4.4157	0.0463	0.3173
227	Test	1	0.041	1.225	1	4	0.0680414	4.6363	0	0.83406	2.33	279.37	2.3766	3.7153	3.7125	0.0622	-0.0032
228	Training	3	0.00566529	1.24993	3	1	0.253437	6.56448	0	0	4.849	397.81	4.2406	5.1809	5.4607	0.0297	0.3071
229	Test	2	0.183	1.329	2	0	0.136083	5.82189	0	0.640332	0.209	339.35	0.8339	3.3633	3.8262	0.1067	0.5293
230	Training	3	0.000998828	1.21771	2	1	0.25	7.26067	1.2657	0.863585	8.837	506.44	7.2123	6.922	5.7447	0.0535	-1.3079
231	Training	1	0.0414493	1.22482	1	4	0.0680414	4.6363	0	0.83406	2.33	279.37	2.3766	3.5702	3.7125	0.0622	0.1588
236	Training	0	0.0686369	0.815932	0	1	0	2.44224	2.72716	0.450484	1.049	162.24	0.6522	3.9037	4.439	0.0461	0.5924
238	Training	2	0.0383118	1.21206	1	1	0.136083	7.76153	5.33167	0	5.955	368.52	4.451	4.9982	5.5844	0.0543	0.6514
240	Training	0	-0.012872	0.610256	0	0	0	0	0	0	1.378	94.94	0.9911	4.5625	4.9573	0.0818	0.4453
242	Training	0	0.00105868	0.607512	0	0	0	0.497468	0	0	1.618	73.13	1.0128	6.0478	5.2062	0.0807	-0.9486
243	Test	0	-0.05	1.415	0	0	0	3.57334	0	0.401389	4.421	170.33	3.6163	5.4988	4.5615	0.0562	-1.0427
244	Test	0	-0.118	0.764	0	0	0	2.47441	0	0	0.396	130.21	1.2561	6.3782	4.974	0.0794	-1.5817
245	Training	2	0.0241432	1.15562	4	0	0.964032	6.60436	0	0.407824	4.402	360.38	4.166	7.8846	8.3084	0.0966	0.482
246	Training	1	0.0185912	1.28129	1	1	0.0680414	4.90519	0	0.533165	3.695	283.83	3.5765	4.0819	4.655	0.0176	0.6248
247	Training	2	0.00856265	1.21196	5	2	0.100916	6.27033	0	0	3.504	409.3	4.8894	3.9053	5.8909	0.0524	2.2045
250	Training	1	0.055413	1.4598	0	2	0.395619	12.6643	0	0.421591	3.431	542.78	4.3701	7.7346	7.2046	0.1308	-0.6143
253	Training	1	0.113601	1.16827	0	0	0.419621	3.87229	0	0.370692	0.317	155.24	1.1171	5.077	4.6995	0.0403	-0.4164
256	Training	2	0.0439861	1.15634	0	0	0.321478	3.66257	0	0	2.634	225.28	1.6937	4.0785	4.4646	0.0255	0.4226
257	Training	1	-0.0105217	1.32616	0	0	0.151375	3.20879	7.45154	0.714375	4.956	186.22	2.3776	3.0147	3.3682	0.1007	0.4028
258	Training	1	0.0508242	1.27655	1	2	0.151375	4.74789	0	0.821908	4.914	271.39	3.2762	4.0408	4.8356	0.041	0.8772
261	Training	2	0.0427294	1.17376	0	2	0.166667	5.79989	0	0.662942	7.208	408.41	4.4227	7.208	5.1622	0.0515	-2.2701
262	Training	1	-0.00392583	0.9651	0	0	0.0833333	4.51179	0	0	3.791	230.9	3.5139	4.6	5.6348	0.0296	1.1354
266	Test	2	-0.02	1.061	5	1	0.136083	6.10081	1.03184	0	6.321	492.73	6.7991	5.4115	7.0541	0.0521	1.8233
267	Training	2	-0.0233959	1.04675	7	0	0.113402	6.72114	1.02173	0	6.934	529.16	6.7439	9.235	8.0868	0.1046	-1.3114
268	Training	1	0.101636	1.39937	0	0	0.201184	4.54003	0	0	4.103	213.38	3.1584	6.0152	5.0731	0.0335	-1.0357
270	Training	2	-0.00552883	1.17686	1	0	0.185395	2.88317	0	0	5.063	170.22	3.081	4.8313	4.6816	0.0327	-0.1645
272	Training	1	0.211501	1.28988	4	2	0.0555556	5.30048	6.7913	0	1.815	346.41	2.3542	5.3782	4.7667	0.1101	-0.7006
273	Test	2	0.021	1.185	4	1	0.255449	7.04997	0	0	4.204	345.25	5.2245	5.4061	6.6781	0.0312	1.3967
274	Training	2	0.0693954	1.20429	1	5	0.253934	4.61648	0	0.86531	1.586	278.34	1.9155	2.7202	3.1323	0.0923	0.4674
275	Training	0	0.0658932	0.859992	0	3	0	3.22383	2.77156	0	0.37	219.3	0.2121	5.7449	4.4556	0.0624	-1.4391
276	Training	5	0.050073	1.41756	2	3	0.635919	9.91358	0	0.80579	5.41	539.58	4.7467	5.9327	4.5903	0.1087	-1.5367
277	Training	1	0.117269	1.29107	0	0	0.433013	3.07285	0	0	0.349	143.21	0.4175	3.5326	4.4642	0.0547	1.0355
280	Training	2	0.0727088	1.37199	4	1	0.193041	7.89526	0.570958	0	4.887	400.52	3.2799	5.7334	6.5059	0.0382	0.8513
282	Training	1	-0.0111611	1.04886	2	0	0.0833333	1.81078	0	0	1.72	139.12	1.457	3.818	4.5281	0.025	0.7772
284	Training	0	0.0648116	1.27912	0	0	0	4.09376	0	0	2.857	203.39	3.3311	4.4738	5.1016	0.0265	0.6877
285	Training	0	-0.0651431	1.39951	0	0	0	2.91151	7.47039	0.5125	3.587	158.27	3.1742	3.217	3.1841	0.1083	-0.0377
286	Training	1	-0.0125176	1.04615	6	0	0.037037	4.08262	0	0	3.163	295.32	5.0464	5.5838	6.6434	0.0804	1.1942
287	Test	1	-0.04	1.005	6	0	0.037037	3.80834	0	0	2.313	266.32	4.8846	6.0452	6.393	0.0861	0.3933
288	Test	2	0.047	1.359	1	0	0.351268	7.19375	5.45843	0	4.791	359.46	4.7365	5.1523	5.4042	0.0536	0.2799
289	Training	3	0.0167594	1.13973	2	0	1.12573	7.95923	0	0.507571	7.313	391.31	5.4387	8.8144	8.584	0.0958	-0.2618
290	Training	0	-0.0128604	1.40556	0	0	0	4.51012	0	0.330024	6.196	240.43	5.011	5.0173	5.4709	0.0641	0.5067
291	Training	2	0.0274304	1.13105	3	0	0.166667	4.52841	2.66525	0	4.496	300.34	3.42	5.1701	5.4102	0.0225	0.2625
292	Training	1	0.401792	1.08474	0	0	0.347716	10.1479	0	0	2.933	317.35	1.9558	7.7533	8.1147	0.1267	0.418
296	Training	2	0.0322582	1.19173	0	0	0.166667	5.06346	0	0	5.878	367.35	3.7112	4.6619	5.296	0.0268	0.6946
298	Training	2	0.0166387	1.43794	2	0	0.151375	6.31353	0	0	4.081	330.28	4.51	5.2423	5.0877	0.0319	-0.1698
302	Training	1	0.0450427	1.10451	0	0	0.0680414	4.0674	0	0	1.53	225.34	2.5623	3.9428	4.5475	0.0175	0.6594
303	Training	1	0.0720337	1.10493	0	0	0.0680414	4.84079	0	0	2.266	241.41	3.1205	4.168	5.0318	0.0162	0.9412
304	Training	1	0.0104104	1.17419	1	0	0.102062	3.59393	0	0.505388	3.515	211.71	2.6276	4.4336	4.6879	0.019	0.2775
311	Training	3	-0.00475215	1.28862	1	1	0.38658	7.01695	0	0	3.182	344.29	3.3869	5.2469	4.8344	0.042	-0.4555
312	Test	2	0.011	1.272	3	1	0.262892	6.86787	0	0	3.639	426.7	4.8917	6.0058	5.9784	0.0245	-0.0301
313	Training	2	0.0584926	1.01145	0	3	0.170103	3.35261	0.89203	0.51776	1.64	217.26	-0.2184	3.3974	3.1633	0.0521	-0.2599
314	Training	3	0.0458582	1.15616	3	3	0.318041	5.87577	0	0	4.635	387.85	4.6425	7.3927	5.351	0.0487	-2.2623
315	Training	2	0.0108976	1.08572	4	3	0.313607	5.61119	0	0.953921	3.149	413.2	5.144	5.8148	5.2941	0.055	-0.5789
316	Training	2	0.0472288	1.29959	0	1	0.138889	9.34132	0	0	7.621	364.98	4.4311	8.5536	6.6912	0.0573	-2.0731
317	Training	2	0.00205414	1.16786	4	0	0.138889	7.27643	0	0.677351	6.526	491.13	6.509	6.1349	6.7188	0.0554	0.6494
320	Training	2	0.0433647	1.06816	1	0	0.170103	3.46534	0	0	3.861	199.28	2.6876	4.8165	4.8403	0.0221	0.026
321	Test	3	0.068	1.107	3	1	0.287457	5.29397	0	0	6.157	321.4	4.772	5.905	5.9284	0.0369	0.0258
322	Training	1	-0.024328	1.21858	2	0	0.123597	3.79643	7.31937	0	2.246	242.06	2.9495	3.9097	4.122	0.0709	0.2381
323	Training	2	0.00356071	1.20424	5	0	0.20693	4.99044	0	0	4.856	308.14	5.1108	6.5696	6.4096	0.0456	-0.1771
324	Test	2	0.033	1.119	3	4	0.219416	5.86331	0	0.90409	4.498	372.83	4.6883	4.8682	5.0676	0.0596	0.2222
325	Training	2	0.0328729	1.11949	3	4	0.219416	5.86331	0	0.90409	4.498	372.83	4.6883	3.8563	5.0676	0.0596	1.3499
326	Test	2	0.239	1.286	1	2	0.151375	6.0053	1.20951	0	0.759	431.5	1.1487	3.382	4.0499	0.0633	0.7458
327	Training	1	0.0804873	1.34346	5	2	0.39118	7.63015	0	0.46922	2.076	394.45	3.9307	8.0277	6.8591	0.0855	-1.3208
328	Test	4	0.046	1.19	1	0	1.00957	6.78723	5.34827	0	4.844	331.4	3.5519	4.7451	5.8681	0.1308	1.3019
329	Training	1	0.0556516	1.43653	0	0	0.0555556	7.44198	0	0.534491	3.982	327.54	3.1302	3.6344	5.0413	0.0433	1.5545
331	Training	1	0.00685468	1.00307	0	0	0.0680414	2.65038	0	0	1.075	201.69	2.1582	5.2632	4.1735	0.0236	-1.1919
332	Test	1	0.019	1.281	1	1	0.0680414	4.90519	0	0.533165	3.695	283.83	3.5765	4.038	4.655	0.0176	0.6727
335	Training	1	0.0698381	1.51908	0	1	0.288675	7.99508	0	0	4.864	297.54	3.7831	4.8037	6.1419	0.0501	1.484
337	Training	1	0.0231388	1.40158	0	0	0.201184	4.25211	0	0.456944	3.456	197.36	2.9886	4.4149	4.3449	0.0296	-0.0768
338	Training	1	0.0184694	1.43788	0	0	0.201184	5.66632	0	0.456944	5.732	253.48	4.8134	6.2608	5.3242	0.034	-1.03
339	Test	2	0.018	1.4	1	1	0.185395	6.93755	0	0	3.824	307.86	3.6322	4.9517	4.9887	0.0285	0.0405
340	Training	2	0.0304056	1.21659	0	1	0.151375	7.67918	5.21349	0	7.812	352.52	4.9236	4.9674	5.8167	0.0767	0.9554
341	Training	2	0.0229639	1.29841	1	1	0.341385	7.09401	4.58543	0	5.477	333.9	4.5772	6.9194	5.6172	0.0412	-1.4373
342	Training	1	0.0768963	1.20197	0	1	0.126967	5.20993	0.790527	0	1.332	228.36	1.4332	2.8858	4.5793	0.0173	1.8463
343	Training	2	0.00408319	1.14133	4	0	0.943348	7.21158	0	0.749097	5.328	418.76	5.673	9.7768	8.4526	0.1016	-1.5099
344	Training	2	0.0965286	1.33397	2	0	0.123597	7.24045	0	0.634157	1.342	440.85	2.4153	3.9549	4.4457	0.0866	0.555
345	Test	1	0.006	1.184	0	0	0.0453609	4.55848	0.59854	0.49554	1.38	216.69	1.008	3.5229	3.9081	0.0347	0.4238
347	Test	1	0.072	1.159	0	0	0.0680414	5.14805	0	0	2.223	241.41	2.948	4.9529	4.9839	0.0166	0.0338
348	Training	1	0.0624196	1.09319	3	0	0.0555556	5.01549	0	0	3.46	365.96	3.5293	8.2847	6.2239	0.0241	-2.2547
349	Training	2	0.00664457	1.31001	2	0	0.170103	5.49742	0	0	3.857	372.17	4.0338	5.0836	5.1197	0.0206	0.0394
350	Training	1	0.0656762	1.24145	0	0	0.102062	3.00058	-0.353462	0	1.898	160.22	0.4009	3.6751	4.1146	0.0228	0.4805
351	Training	2	0.0533983	1.39896	0	0	1.28805	7.86386	0	0.379107	3.197	331.45	3.4492	6.8671	7.5678	0.1601	0.8263
352	Test	2	0.046	1.097	0	1	0.358305	3.69493	0	0	2.389	201.27	2.1546	5.5403	4.5136	0.0278	-1.1254
353	Training	2	0.0278319	1.1474	0	0	0.25	4.70289	0	0	2.144	252.75	2.6236	4.0501	4.4879	0.0256	0.4793
354	Training	2	0.0349243	1.32521	0	0	0.128694	7.08117	0	0	5.36	396.42	4.9252	4.8128	5.3814	0.0296	0.6238
355	Training	2	0.063594	1.06124	1	0	0.204124	3.51261	-0.72031	0	2.151	220.28	1.1923	4.448	4.6067	0.0265	0.1738
357	Training	0	0.105395	0.816557	0	4	0	6.67672	0	0.487917	2.701	354.53	2.1022	6.9642	6.1699	0.1149	-0.9124
358	Test	1	-0.012	1.084	2	0	0.0833333	4.50349	1.10198	0	2.534	342.44	2.7154	4.8103	5.4042	0.0184	0.6479
360	Training	3	0.0671391	1.07971	0	0	0.321478	4.21416	0	0	4.831	228.29	3.0986	5.4373	4.687	0.0507	-0.8323
363	Training	1	0.108594	1.15502	1	0	0.0833333	7.21286	0	0	4.181	347.29	5.4692	6.262	6.5555	0.0248	0.3213
364	Training	1	0.32104	1.14337	1	0	0.0833333	3.72577	0.529106	0	1.851	214.32	1.8152	3.8382	5.0273	0.0815	1.3409
366	Training	2	0.0316719	1.20922	2	3	0.166667	5.85031	0	1.03547	2.603	293.78	3.4939	4.6131	3.9499	0.0544	-0.7371
367	Training	0	0.0145492	1.21143	0	0	0	6.14689	0	0.384564	3.824	304.69	3.96	6.0689	5.8409	0.04	-0.2515
369	Training	0	0.473225	1.30593	0	0	0	10.1684	0	0	5.358	314.57	5.8689	7.6651	8.1928	0.1649	0.6241
371	Test	1	0.049	0.46	0	0	0.037037	2.70441	0	0	0.588	232.41	1.1076	5.5601	5.3969	0.1243	-0.1885
372	Test	1	0.008	0.533	0	0	0.0680414	2.15665	0	0	1.2	229.47	2.0847	5.2815	5.2301	0.0969	-0.0585
373	Training	1	-0.0316271	0.898556	2	2	0.0555556	3.40281	8.04012	0.877545	1.511	256.47	3.074	3.2856	3.3727	0.102	0.0994
374	Training	2	0.0628515	1.22438	0	0	0.166667	5.39585	0	0	2.136	285.98	2.5157	2.5929	4.3467	0.0301	1.9247
375	Test	1	-0.012	0.94	0	1	0.142259	4.81029	0	0	2.681	247.54	2.6664	4.9126	5.4941	0.0324	0.6389
377	Test	0	-0.027	0.643	0	0	0	0	0	0	1.578	141.94	1.5224	5.025	4.9111	0.0778	-0.1282
378	Test	2	0.021	1.156	4	0	0.957439	7.04006	0	0.52588	3.117	385.39	4.0051	7.6938	7.9891	0.1017	0.3367
True external set
ID	NRS	MATS1m	SpMin1_Bh(s)	C-026	CATS2D_03_AA	SCH-6	VP-2	minHBint2	minHCsatu	XLogP	MW	ALOGP	Predicted pEC50	HAT i/i (h*=0.1728)
1	0	-0.0105214	1.14432	0	0	0	3.15694	0	0	3.055	236.33	2.4937	5.0956	0.0297
4	1	0.105635	1.26098	1	0	0.328567	4.41143	0	0	3.397	207.32	2.9099	5.7936	0.0258
6	3	0.0850152	1.48772	0	6	0.539749	16.9659	0	0.462238	4.223	746.1	4.9172	7.0141	0.2911
18	1	-0.0240903	0.862431	0	0	0.0555556	2.80068	0.371327	0	1.673	198.43	1.4295	4.6236	0.0363
23	1	-0.0350943	0.915567	1	0	0.102062	1.28055	0	0	0.37	94.13	-0.0672	4.0679	0.0343
26	0	0.442019	0.888527	0	0	0	3.28798	-0.579353	0.517099	-0.269	183.19	-0.2833	5.1146	0.1882
28	1	0.0173515	1.11845	0	0	0.0833333	3.4915	0	0.520537	1.783	222.7	1.6036	3.9985	0.0272
30	4	0.0535373	1.653	0	1	0.423963	14.0623	0	0.618334	3.524	593.73	2.1505	4.94	0.2479
33	0	-0.179074	0.788214	0	0	0	0.471249	0	0.540278	0.116	58.09	0.2588	3.6943	0.0943
38	1	0.0373958	1.16153	2	0	0.0680414	3.48224	2.87716	0	1.924	208.29	2.242	4.5288	0.0204
40	2	0.0503206	1.1793	2	0	0.136083	5.73449	0	0	6.643	293.45	5.4133	6.2481	0.0241
42	2	0.0196839	1.41291	2	1	0.0680414	10.2073	5.71838	0.661012	6.07	548.7	4.309	5.4257	0.0988
43	1	0.00933211	1.09968	0	0	0.0680414	3.41908	0	0	1.535	215.72	2.5357	4.3074	0.0188
44	3	0.0551906	1.11252	2	0	0.25	5.76154	0	0	5.03	403.42	3.6836	5.5131	0.0324
47	1	0.0427485	1.29984	3	2	0.0555556	4.86276	0	0	5.056	335.32	4.4008	5.7827	0.0533
49	1	0.41048	1.19595	1	0	0.102062	12.0753	3.30641	0	4.964	397.57	3.4993	8.2821	0.1683
50	0	-0.0294118	1.44429	0	0	0	7.35206	0	0.290278	12.911	322.69	10.4196	8.1281	0.2246
52	2	0.0385278	1.13479	0	0	0.204124	3.42776	0	0	5.895	212.26	3.2689	5.0186	0.0411
58	3	0.000368505	1.19623	2	0	0.25	5.64282	5.16923	0	5.511	343.22	4.5205	4.7242	0.0551
64	3	0.000892397	1.31237	2	1	0.40326	6.96253	0	0	3.164	377.08	3.1816	5.0786	0.0385
66	0	-0.007233	1.24512	0	2	0	3.42144	0	0	1.391	190.32	1.4639	4.1998	0.0487
69	1	0.00491204	1.38026	0	0	0.347716	8.20241	0	0.48535	2.77	349.07	3.5113	5.8253	0.0564
70	1	0.0327366	1.27351	1	0	0.151375	3.1168	2.95157	0	4.089	201.24	2.502	4.6405	0.0336
74	2	0.010319	1.30484	0	0	0.166667	4.73809	0	0.572897	0.836	252.29	0.3773	3.0693	0.0665
76	1	-0.00269557	1.15043	1	2	0.39614	4.87392	0	0	3.441	274.71	2.9672	5.9903	0.0442
77	0	-0.246961	0.218515	0	0	0	3.27558	0	0	1.604	164.37	3.288	6.771	0.3291
78	1	-0.0138597	1.05097	2	2	0.0833333	2.99213	7.71561	0.847786	2.356	200.63	2.525	3.2417	0.0841
83	1	0	1.10117	0	0	0.102062	1.90588	0	0	3.985	132.17	1.9496	4.5537	0.0347
84	1	0.0202606	1.23063	1	0	0.0555556	3.32159	2.8599	0	3.393	193.27	3.0522	4.3748	0.0218
86	1	0.249457	1.16133	2	0	0.113402	7.67352	0	0.518994	4.566	362.79	3.8934	6.9213	0.0642
92	2	0.0214027	1.30086	0	1	0.166667	8.19034	0	0	8.819	447.49	5.1221	6.6803	0.0643
99	2	-0.0119566	0.829956	0	0	0.234708	2.79403	0	0	-0.669	166.22	0.3139	3.8134	0.075
106	1	0.35905	1.15242	0	0	0.0680414	7.16955	0	0	4.296	304.39	3.1366	6.5781	0.0835
110	2	0	1.28852	2	0	0.166667	5.95188	0	0	6.367	320.04	5.7459	5.9845	0.0227
112	1	-0.0160472	1.0484	3	2	0.0680414	3.5167	7.60693	0.846981	2.452	235.07	3.1894	3.6908	0.0838
117	2	0.047619	1.03852	0	0	0.611111	7.98641	0	0	6.094	474.6	5.7376	7.8482	0.0525
118	1	0.0166007	1.29489	1	2	0.0680414	4.81777	0	0.577888	4.12	311.84	4.0554	4.5292	0.0276
119	1	0.0228948	1.17063	0	0	0.0833333	3.34692	0	0	3.767	191.3	2.4278	4.7676	0.0195
123	2	-0.0160155	1.05999	4	0	0.151375	4.44824	1.06184	0	4.688	310.7	3.4701	5.9836	0.0312
126	0	0.455875	0.969814	0	0	0	8.28288	5.01617	0.500069	0.899	229.29	0.5657	6.2253	0.2214
127	0	0.379172	0.731931	0	0	0	2.24719	0	0	1.566	94.22	1.3858	5.9218	0.1528
129	1	0.0467581	1.41579	3	1	0.0555556	6.13345	0	0.488288	7.197	364.44	5.9616	6.2526	0.0545
134	1	-0.00164198	1.05791	3	0	0.0680414	3.76787	0.710351	0	2.016	233.11	2.481	5.3854	0.0251
135	2	0.142163	1.23586	1	0	0.136083	6.94672	1.18346	0	3.139	492.49	3.2712	5.25	0.031
141	1	0.00193128	1.4187	0	0	1.53473	9.58183	0	0	3.005	380.9	3.4047	9.6572	0.317
143	3	0.0244261	1.31504	3	1	0.268729	7.64331	0	0.786476	7.782	419.93	6.6715	5.8981	0.0407
145	1	0.0429176	1.21586	3	2	0.0555556	4.90082	0	0.50306	4.172	333.3	4.1353	5.3781	0.0309
146	0	0.127227	1.14134	0	0	0	1.90005	5.52582	0	-0.552	144.5	-0.6575	3.2463	0.0636
147	1	0.277789	1.26066	2	0	0.348462	5.46522	0	0	1.955	286.38	2.4573	6.2868	0.0681
151	3	0.0614972	1.30167	3	0	0.268729	7.39659	0	0	7.698	376.53	6.0243	6.6228	0.0353
167	3	0.0244261	1.31504	3	1	0.268729	7.64331	0	0.786476	7.782	419.93	6.6715	5.8981	0.0407
175	2	0.0139113	1.08038	4	3	0.111111	5.6329	0	0.758082	3.328	408.76	3.9494	4.9989	0.0498
176	2	0.0230463	1.23781	5	2	0.123597	6.05112	0	0	6.036	421.76	5.5255	6.5179	0.0582
178	1	0.0044376	1.09976	1	0	0.0833333	3.40314	0.695287	0	2.938	232.23	2.0945	4.9102	0.0128
179	2	-0.00837147	1.09366	3	0	0.136083	5.65121	5.29367	0	4.489	383.59	4.835	5.4373	0.0464
181	2	0.0154751	1.16983	0	1	0.269226	4.39141	0	0.832968	2.778	288.7	1.9789	3.7519	0.0409
184	2	0.0349027	1.32532	4	2	0.384123	7.65748	0	0.644252	2.28	403.92	4.7172	5.7103	0.0539
185	2	0.0133073	1.12501	2	0	0.166667	5.1919	6.38069	0	6.13	323.34	4.2669	5.3588	0.059
186	3	0.0175583	1.25813	2	1	0.268729	4.94007	0	0	3.732	301.32	2.7194	4.3891	0.0341
187	3	0.0124306	1.25152	4	1	0.253437	8.39924	0	0.908154	8.22	502.95	7.5028	6.5487	0.0604
189	1	-0.00779702	1.08474	0	0	0.347716	7.10094	0	0	3.802	296.56	4.4497	6.8499	0.0416
190	1	0.425032	1.26333	1	0	0.102062	10.2959	0	0	5.312	246.36	3.4133	8.0336	0.1273
194	1	-0.0352761	1.0913	2	0	0.0680414	2.48355	0	0	2.834	207.12	2.3993	4.8724	0.0228
195	2	0.0190584	1.13988	2	2	0.151375	5.14624	0	0.868706	4.904	345.78	3.9734	4.7334	0.0348
199	1	0.0115262	1.28934	0	0	0.786639	8.28639	0	0.30355	3.55	373.3	4.2377	7.5679	0.0794
201	2	-0.0199036	1.05819	6	0	0.123597	6.05288	1.02432	0	5.957	461.16	5.6148	7.3314	0.0715
205	3	0.0118552	1.3162	0	1	0.238835	8.73728	1.03315	0	10.949	494.53	6.7127	6.6776	0.0985
218	3	0.0649869	1.27193	0	2	0.380901	5.08558	0	0.797292	6.623	295.36	3.3851	4.2272	0.0691
219	3	0.153148	1.25543	1	0	0.411054	6.18309	0	0	3.26	359.35	3.0599	5.0711	0.0472
220	3	0.0156437	1.13144	2	1	1.08288	8.17802	0	0.723411	7.075	449.88	5.8977	8.1932	0.0877
222	1	0	1.39069	0	0	0.037037	5.69027	0	0	3.834	290.82	4.1574	4.8446	0.0308
224	0	0.395287	1.13846	0	0	0	9.78235	0	0.719041	2.007	330.4	1.8946	6.927	0.1797
226	1	-0.0101326	1.12345	2	2	0.0680414	3.44457	7.60265	0.847968	2.468	214.66	3.0112	3.215	0.0804
232	1	0.0840777	0.999722	0	0	0	2.81485	0	0	1.628	176.24	0.1176	4.3071	0.0241
233	3	0.0262986	1.38115	1	1	0.503964	7.40382	0	0	3.781	319.87	3.5799	5.2312	0.0393
234	1	0.341926	0.948082	0	2	0.232308	9.80413	0	0	1.774	302.37	2.3577	7.3807	0.1159
235	1	0.0632942	1.1972	2	0	0.0555556	4.04633	2.85538	0	2.804	225.34	3.1078	4.8637	0.0191
237	2	0.00740684	1.2744	2	0	0.166667	6.88988	0	0	5.94	345.66	4.9695	6.2174	0.0221
239	1	-0.0115743	1.07026	1	0	0.0833333	2.07883	0	0	1.964	151.18	0.9388	4.3517	0.0204
241	3	0.0858139	1.55027	0	6	0.562429	17.0923	0	0.563008	5.108	748.12	5.2642	7.1194	0.2795
248	1	0.064884	1.20327	0	2	0.0555556	4.73386	0	0	1.122	214.33	1.4663	4.118	0.0274
249	1	0.0593109	1.42422	0	0	0.641206	6.70346	0	0.493056	3.493	275.43	3.1272	6.2407	0.0569
251	1	0.0841908	1.33576	0	0	0	4.31545	0	0	1.948	187.34	2.5033	4.0358	0.026
252	3	0.0858721	1.46836	0	6	0.562429	16.4975	0	0.550433	4.161	732.07	4.4708	6.8853	0.2703
254	1	0.0317012	0.351391	0	0	0	0.65184	0	0	0.155	69.08	-0.41	4.7704	0.1513
255	0	-0.0277205	0.837006	0	0	0	1.06902	0	0	-0.384	73.11	-0.4673	4.2366	0.0434
259	1	0.0579375	1.19837	0	0	0.201184	1.70911	0	0	1.02	116.13	1.3841	3.768	0.0358
260	0	-0.0502222	1.30852	0	0	0	4.9706	0	0.314391	4.29	222.41	4.562	5.3134	0.045
263	1	0.0557686	1.21063	0	0	0.144338	2.01038	0	0	0.569	85.17	0.7811	3.5638	0.0326
264	1	0.0409144	1.17375	0	0	0.235702	1.91885	0	0.456944	-0.17	99.15	-0.1649	3.2895	0.045
265	2	-0.000141269	1.10958	1	1	0.138889	4.26523	0	0	4.192	303.69	2.0238	4.8103	0.0205
269	0	0.43505	0.931038	0	0	0	3.57774	5.33061	0.580508	-1.052	213.22	-0.3334	4.1435	0.2169
271	2	0.196809	1.11646	1	0	0.151375	6.03624	0.920527	0	2.312	424.49	1.1569	5.169	0.0419
278	0	0.406212	1.23313	0	0	0	5.06479	0	0	-0.659	246.32	0.2442	5.0053	0.118
279	2	0.0173299	1.3705	1	1	0.166667	6.52073	0	0	3.298	293.83	3.3485	4.7361	0.0277
281	1	0	1.03397	2	0	0.0833333	2.30931	0	0	2.988	147	3.1588	5.0853	0.0229
283	1	0.368013	1.0687	2	0	0.0833333	6.09738	0	0	4.326	291.29	2.9029	7.0502	0.1013
293	1	0.350617	1.19867	1	2	0.0833333	8.49047	0	0	4.154	318.42	3.1093	6.8747	0.0839
294	1	0.0215598	1.44177	0	0	0.0833333	4.45791	0	0	1.814	229.36	1.9418	3.9145	0.0384
295	1	-0.0624762	0.910556	3	2	0.0453609	3.21195	7.64487	0	-1.498	241.46	2.1681	3.3996	0.1088
297	2	0.0680921	1.32906	0	4	0.292825	8.64876	0	0	5.599	400.57	5.0625	5.8455	0.0917
299	1	0.0649986	1.04121	0	0	0.0555556	4.19599	0	0	1.231	238.33	2.0119	4.6614	0.0219
300	1	0.362651	1.12597	0	0	0.0680414	6.87244	0	0	3.203	305.38	2.7347	6.2562	0.0836
301	2	0.115731	1.18072	1	0	0.151375	5.58433	1.13398	0	3.463	468.38	3.3846	5.0468	0.0202
305	1	-0.0064472	1.07556	3	0	0.0680414	3.34502	4.87024	0.510671	2.487	218.09	2.9461	4.4473	0.0463
306	1	0.0110169	1.10445	0	0	0.0680414	4.18779	0	0	1.995	229.75	2.9132	4.6715	0.0185
307	1	0.0346251	1.08584	2	1	0.0833333	3.25286	2.93616	0	2.652	209.27	2.3035	4.7308	0.0197
308	0	-0.123352	0.999832	0	0	0	0.747292	8.11898	0.5125	0.173	74.09	0.437	2.4135	0.1132
309	2	0.014686	1.28585	1	1	0.166667	6.1658	0	0.752563	3.71	291.81	3.0987	4.3614	0.0317
310	1	-0.00522622	1.09443	2	0	0.0680414	4.75446	4.41795	0	2.919	256.14	4.1416	5.147	0.0315
318	2	0.0450974	1.39861	1	1	0.170103	7.13174	0	0	8.251	378.96	7.1551	6.2512	0.0498
319	2	0.0100572	1.25079	1	0	0.215464	6.91679	0	0.741738	5.764	464.38	3.1434	5.5185	0.0348
330	2	0.027468	1.49786	1	0	0.185395	4.83272	0.904688	0	4.018	232.36	3.1239	4.16	0.0412
333	2	0.0515026	1.28831	0	1	0.467775	9.28027	0	0.626405	7.351	370.53	5.6369	6.9938	0.0418
334	2	0.0550145	1.46757	0	0	0.391873	7.27887	4.01864	0	5.002	373.49	3.5421	5.2227	0.0534
336	0	0.466797	1.00078	0	0	0	8.8053	0	0	4.194	322.36	2.4403	8.1946	0.1687
346	1	0.0110169	1.15894	0	0	0.0680414	4.49505	0	0	1.952	229.75	2.7407	4.6225	0.0193
356	1	0.0395074	1.15941	1	0	0.0833333	4.71637	0	0	3.52	257.81	3.7266	5.4688	0.0115
359	0	0.173367	0.864921	0	0	0	5.23244	0	0	1.548	240.48	3.1558	6.2922	0.0526
361	1	0.206935	1.11836	3	0	0.0555556	6.92468	0	0	4.108	301.14	4.1259	7.1364	0.0475
362	3	0.0301178	1.15997	3	1	0.424718	6.70615	4.90819	0	5.26	383.91	5.2232	5.743	0.0457
365	3	-0.000352559	1.17257	2	1	1.27551	15.6333	0	0.619408	9.232	665.02	7.0336	11.6461	0.2319
368	1	0.0795215	1.18811	0	2	0.171709	6.59298	0	0.679977	1.734	314.46	2.6366	4.7163	0.0345
370	0	0.042794	1.03212	0	3	0	4.76484	0	0	0.527	257.44	0.7531	4.8585	0.0572
376	2	-0.0374623	1.11433	4	1	0.2804	6.19333	0.509145	0	2.81	437.17	5.5792	6.1313	0.0388

## Sheet: Table S5-R-ORes
Table S5. Descriptor values, experimental and predicted pLD50 values, hat values and standardized residuals of all training, test, and true external compounds of the R-ORes model
Modeling data set
ID	Status	MATS6v	JGI3	nCs	CATS2D_04_DL	F02[C-N]	VP-3	nssCH2	minsssN	ETA_dEpsilon_B	MDEO-11	MW	ALOGP	Experimental pLD50	Predicted pLD50	HAT i/i (h*=0.2120)	Std.Pred.Mod.Eq. Res.
1	Test	0	0.031	1	0	0	3.37808	2	0	0	0	236.33	2.4937	3.1431	3.4656	0.0453	0.6685
3	Training	1.235	0.066	0	2	2	2.24874	0	0	0.10349	0	151.2	1.3753	2.1709	1.6836	0.1432	-1.0662
5	Training	-0.412	0.062	0	0	3	2.54164	6	2.46875	0	0	171.33	1.4094	2.734	2.3366	0.1221	-0.8589
8	Training	0.123	0.046	0	0	0	1.77554	1	0	0.11206	0.5	221.04	2.8119	2.7704	2.3646	0.0476	-0.8419
9	Training	0.134	0.035	2	0	0	2.90287	6	0	0.04463	0	321.22	4.2607	2.5872	2.6701	0.0782	0.1748
10	Training	0.123	0.039	4	0	0	3.45878	6	0	0.03438	0	333.28	6.012	2.5306	2.6427	0.0531	0.2333
11	Training	0.486	0.056	1	0	0	2.13706	1	0	0.06348	0	263.13	3.7892	2.575	2.4792	0.042	-0.1983
12	Test	0.022	0.048	2	0	0	2.21694	3	0	0.07488	0.5	249.1	3.1679	2.5513	2.4026	0.0383	-0.3069
13	Training	-0.039	0.039	1	1	0	2.51404	1	0	0.09051	0	218.69	4.2016	2.1094	2.6239	0.0265	1.0559
15	Training	0.004	0.014	6	0	0	2.92645	9	0	0	0	190.39	3.4093	1.3486	2.5982	0.1147	2.6891
18	Training	0	0.058	0	0	2	1.87699	0	0	0.1505	0	198.43	1.4295	2.3945	2.1231	0.0503	-0.5639
24	Training	0.966	0.077	0	2	0	2.01739	0	0	0.06887	0	156.62	3.1994	1.6116	1.9763	0.1027	0.7795
25	Training	0.871	0.056	0	1	0	1.56561	0	0	0.08612	0	142.59	2.7132	1.8916	2.0924	0.0791	0.4237
26	Training	-0.251	0.08	0	0	1	2.24538	0	0	0	0.25	183.19	-0.2833	2.4178	3.0649	0.0461	1.3417
32	Training	-0.205	0.042	0	0	2	2.16224	0	0	0	0.650698	222.3	0.1517	4.0458	3.214	0.0579	-1.7353
33	Test	0	0	0	0	0	0.129099	1	0	0.03944	0	58.09	0.2588	2.9578	2.8905	0.0905	-0.143
35	Training	-0.059	0.081	6	0	2	3.76438	1	0	0	0.5	527.24	4.6484	2.9872	2.6113	0.1406	-0.8211
36	Training	-0.391	0.066	1	2	3	2.09786	1	0	0.04079	0	227.38	2.743	2.6508	2.471	0.0319	-0.37
40	Test	0.245	0.042	0	0	4	3.4625	0	1.85972	0.04678	0	293.45	5.4133	2.8654	2.5956	0.0719	-0.567
41	Training	0.25	0.062	0	3	2	2.36881	0	0	0.17415	0	275.53	4.3922	2.0088	1.5962	0.0703	-0.8665
43	Test	-0.478	0.074	1	2	3	1.52982	1	0	0.05222	0	215.72	2.5357	2.5064	2.2486	0.0423	-0.5334
45	Training	0	0.116	0	0	4	3.01647	0	1.36092	0	0.25	241.48	0.9231	2.2398	2.3875	0.0761	0.3111
46	Training	-0.355	0.073	1	1	0	2.05316	0	0	0.05833	0	223.25	1.4788	3.7467	2.6403	0.034	-2.2792
47	Training	-0.148	0.057	2	0	8	3.38566	4	1.36103	0.05747	1.44225	335.32	4.4008	1.5254	1.8383	0.0758	0.6592
48	Test	-0.076	0.064	2	4	5	2.9697	3	0	0.05368	0.166667	290.36	2.9654	1.4629	1.8863	0.0647	0.8865
49	Training	-0.274	0.077	2	2	2	8.28591	2	0	0.03196	0.5	397.57	3.4993	3.1664	3.6277	0.0738	0.9707
53	Training	-0.283	0.061	1	0	1	5.13576	0	0	0.08197	0	434.31	5.6169	2.6835	3.3211	0.0266	1.3084
59	Training	-0.43	0.079	2	2	5	3.21457	1	1.33854	0.02043	0.25	261.14	1.4107	2.61	2.2246	0.0513	-0.8011
63	Training	-0.343	0.067	0	1	1	2.35497	0	0	0.12214	0	276.91	2.9383	3.1636	2.4053	0.0352	-1.5633
64	Test	0.014	0.073	2	0	4	4.53355	3	0	0.08486	0	377.08	3.1816	3.0142	2.5096	0.0447	-1.0452
65	Training	1.204	0.052	1	0	2	1.55587	2	0	0	1.68369	200	0.0568	3.0457	2.0907	0.211	-2.1771
67	Training	-0.3	0.053	2	1	8	3.48183	1	0	0.0377	1.44225	295.38	4.0779	2.0724	2.4345	0.0998	0.7729
68	Training	-0.176	0.067	0	0	2	2.49091	3	2.10738	0	0	217.42	3.5135	1.7351	2.5109	0.055	1.6159
70	Training	-0.192	0.039	0	2	0	2.15641	0	0	0.08476	0	201.24	2.502	2.9419	2.6727	0.0393	-0.5563
71	Training	0.008	0.061	0	3	4	1.79523	0	0	0.0935	0	191.21	1.6508	1.4753	1.9411	0.0341	0.9597
73	Training	0.199	0.051	0	2	3	3.33827	2	0	0.06412	0	235.33	1.4139	2.7382	2.5202	0.0324	-0.4486
74	Training	-0.165	0.067	4	2	0	2.97271	5	0	0.01803	1.26847	252.29	0.3773	1.7525	2.1978	0.1158	0.9588
76	Training	-0.143	0.082	0	3	0	3.69433	0	0	0.10082	0.333333	274.71	2.9672	1.9475	2.4119	0.0583	0.969
77	Test	0	0	0	0	0	0.49099	0	0	0	0.5	164.37	3.288	2.8179	3.2082	0.1228	0.8439
79	Training	0.251	0.08	0	0	2	3.1923	0	0	0.19592	0	265.9	4.2454	1.4247	1.8777	0.1033	0.9686
80	Training	0.093	0.075	1	4	2	1.64885	0	0	0.05927	0	213.68	2.9843	2.2505	1.869	0.065	-0.799
81	Training	-0.115	0.062	0	0	2	4.97243	2	0	0.07108	0	350.6	4.5994	3.631	3.1892	0.0317	-0.9091
82	Training	0.447	0.057	0	0	2	4.85277	0	0	0.10096	0	322.54	3.9018	2.2466	2.9162	0.0503	1.3914
84	Training	0.077	0.066	0	2	0	2.31522	0	0	0.04453	0	193.27	3.0522	3.0357	2.6329	0.0309	-0.8284
86	Training	-0.168	0.062	0	0	0	5.73695	2	0	0.06126	0	362.79	3.8934	4.4457	3.555	0.0406	-1.8415
87	Training	-0.368	0.072	0	2	5	1.81586	1	0	0.05607	0	240.73	2.3359	3.2083	2.2412	0.0439	-2.0026
90	Training	-0.208	0.059	6	0	3	3.62861	7	2.19451	0	0	215.4	3.337	2.1084	1.9594	0.0607	-0.3113
94	Training	-0.164	0.062	0	1	6	1.06795	1	0	0	0.25	198.21	-0.4435	2.2557	2.4367	0.0641	0.3788
95	Training	-0.258	0.064	1	0	1	5.04648	0	0	0.07457	0	416.32	5.4114	3.8597	3.3121	0.0241	-1.1226
96	Training	-0.239	0.064	1	0	1	5.00185	0	0	0.0548	0	375.5	5.5193	3.0722	3.4125	0.0238	0.6973
97	Test	0.024	0.062	2	4	4	4.25944	3	0	0.0584	0	291.81	2.9175	2.4564	2.2002	0.0633	-0.5361
99	Test	-0.166	0.074	3	0	2	1.2919	2	0	0.07013	0	166.22	0.3139	1.6908	2.0131	0.0503	0.6698
100	Training	-0.002	0.069	2	0	4	0.914235	2	1.47637	0	0.814325	160.2	-0.6908	1.2803	1.8724	0.0486	1.2291
101	Training	0.462	0.056	0	0	0	2.96736	2	2.44919	0	0	162.31	1.6021	2.7052	2.5424	0.1023	-0.3479
103	Test	-0.292	0.071	0	0	0	3.89261	0	0	0.11816	0	354.48	6.3311	3.6101	2.9023	0.0366	-1.4602
104	Test	-0.004	0.016	8	1	0	2.01167	9	0	0	0	158.32	3.7079	1.5255	2.0709	0.1295	1.1837
105	Training	-0.326	0.064	1	0	1	5.32317	0	0	0.06853	0	505.22	5.6294	4.7322	3.438	0.0269	-2.6566
106	Training	-0.316	0.07	0	0	5	4.55975	2	0	0.03511	0	304.39	3.1366	3.6638	3.1611	0.0541	-1.0468
107	Test	-0.017	0.045	2	0	2	3.60914	3	0	0	0	265.94	1.9297	2.713	3.1492	0.0337	0.8986
108	Training	0.377	0.072	0	0	1	1.70451	0	0	0.1402	0	172.01	3.0377	1.8026	1.9426	0.0639	0.2931
109	Training	-0.025	0.062	0	0	3	1.57068	2	1.80864	0.04727	0	208.1	2.003	2.0172	2.0691	0.035	0.1069
110	Test	-0.112	0.058	0	0	0	3.71813	0	0	0.10653	0	320.04	5.7459	3.4521	2.9593	0.0271	-1.0116
111	Training	0	0.116	0	0	4	2.39366	0	1.34336	0	0.25	197.03	0.8141	2.5605	2.2512	0.0781	-0.6524
114	Training	0.101	0.038	1	0	0	3.32191	0	0	0.09193	0	341.2	5.0006	2.8237	2.9307	0.0374	0.2207
115	Training	0.009	0.059	0	0	4	1.93093	0	0	0.14497	0.5	207.02	2.3066	1.9358	1.9834	0.0485	0.0988
117	Training	0	0.107	0	0	0	8.62934	0	0	0.21224	0	474.6	5.7376	2.5971	3.0128	0.1813	0.9301
118	Training	-0.111	0.057	2	0	4	3.47141	5	1.61992	0.03356	0.2	311.84	4.0554	2.1321	2.2435	0.0291	0.2289
119	Training	-0.057	0.066	0	0	3	2.31568	2	1.82815	0.0354	0	191.3	2.4278	1.9916	2.2857	0.0328	0.6056
120	Training	0.046	0.038	2	4	0	7.07458	2	0	0.08485	0.25	444.55	6.8965	2.8154	3.1089	0.1124	0.6308
121	Training	-0.04	0.059	2	0	4	4.74443	2	0	0.09498	0	406.29	4.3809	2.4466	2.6867	0.037	0.4954
123	Training	0.035	0.069	0	5	3	2.77095	0	0	0.12998	0.25	310.7	3.4701	1.8258	1.6541	0.0902	-0.3644
125	Test	1.052	0.069	0	0	0	3.04122	2	0	0.03182	1.62865	210.3	-0.374	2.2621	2.3802	0.1944	0.2662
126	Training	0.246	0.036	0	0	1	6.75527	1	0	0	0	229.29	0.5657	3.5823	4.1863	0.0882	1.2809
128	Training	-0.16	0.072	0	0	10	3.20878	2	1.21506	0.07028	1.44225	322.28	2.6743	2.0311	1.8401	0.0979	-0.4072
129	Training	-0.083	0.046	5	0	4	4.10354	5	0	0.04359	1.96013	364.44	5.9616	2.5704	2.2667	0.1465	-0.6656
131	Training	-0.225	0.043	2	0	3	2.08288	4	0	0.0446	0.142857	251.31	2.5637	1.6817	2.5037	0.0407	1.6996
132	Training	-0.139	0.05	0	0	0	7.97687	5	0	0	0	274.45	2.9527	5.0234	4.3235	0.1481	-1.5356
134	Training	-0.483	0.045	0	1	2	2.31608	0	1.53269	0.07115	0	233.11	2.481	2.3602	2.5282	0.0608	0.3511
137	Test	-0.095	0.057	2	0	8	3.2094	4	1.38534	0.05747	1.44225	335.32	4.4683	2.2399	1.7718	0.0754	-0.9857
139	Training	-0.225	0.11	1	0	0	8.65907	2	0	0.04231	0	406.92	2.1414	4.3542	3.8876	0.0948	-0.9932
141	Training	-0.956	0.107	4	0	0	10.0797	1	0	0.03188	0	380.9	3.4047	5.1037	4.3681	0.1594	-1.6246
142	Training	-0.237	0.058	2	0	2	2.30688	5	2.07034	0	0	189.36	2.8749	2.3153	2.2622	0.0469	-0.1101
143	Training	-0.037	0.051	1	0	1	4.89271	0	0	0.07608	0	419.93	6.6715	3.1113	3.2786	0.0276	0.3437
145	Training	-0.13	0.061	0	0	8	3.06485	2	1.24876	0.08077	1.44225	333.3	4.1353	1.5228	1.9231	0.0799	0.845
146	Test	0	0.094	0	2	0	0.817659	2	0	0	1.5	144.5	-0.6575	1.6284	2.076	0.1863	1.0048
147	Training	-0.076	0.088	0	0	0	3.15768	1	0	0.04412	0.5	286.38	2.4573	2.4038	2.8404	0.0442	0.9043
148	Training	-0.303	0.054	2	0	0	5.16706	5	0	0	0	242.38	3.2319	3.644	3.5387	0.0658	-0.2206
149	Training	0.054	0.062	0	1	5	2.76107	1	0	0.04022	0	217.34	3.2213	2.434	2.5763	0.0355	0.2933
150	Training	0	0.111	0	0	2	0.984789	2	0	0	0	102.18	0.0874	1.7464	2.2935	0.1168	1.179
155	Training	-0.108	0.064	0	5	2	4.08556	0	0	0.11951	0	331.21	3.8275	2.1222	2.1958	0.0928	0.1566
156	Training	0.128	0.039	1	0	3	3.95575	2	0	0.06276	0	306.44	5.216	3.3527	2.9374	0.0305	-0.8541
159	Training	-0.04	0.068	0	0	2	4.58087	0	0	0.06562	0.5	277.26	2.6915	3.0449	3.1186	0.022	0.151
160	Test	0.111	0.049	1	0	2	3.52624	1	0	0.09262	0	361.8	4.7523	2.1861	2.71	0.0239	1.0736
163	Test	-0.096	0.059	1	0	1	5.6031	0	0	0.05259	0	349.46	4.8113	3.6741	3.5415	0.0295	-0.2724
164	Test	0.184	0.069	3	0	3	4.46923	4	2.56252	0.01782	0	303.54	4.8434	2.005	2.1886	0.0675	0.3849
165	Training	-0.193	0.057	0	0	8	4.24792	1	0	0.06213	0	421.54	4.8697	3.2356	2.8699	0.0822	-0.773
166	Test	0.184	0.057	0	0	0	5.37551	0	0	0.04725	0	278.36	3.3389	3.1892	3.5747	0.0364	0.7952
167	Training	-0.037	0.051	1	0	1	4.89271	0	0	0.07608	0	419.93	6.6715	3.7768	3.2786	0.0276	-1.0229
169	Test	-0.043	0.041	3	0	2	3.49682	3	0	0.0762	0	383.4	5.3313	2.1198	2.616	0.0306	1.0205
171	Training	-0.045	0.057	1	0	8	3.23934	4	1.42623	0.06943	1.44225	355.73	4.26	2.0827	1.7715	0.0846	-0.6587
176	Test	-0.045	0.056	0	0	8	4.36885	2	1.1391	0.1189	1.44225	421.76	5.5255	2.1337	2.0173	0.1002	-0.2483
178	Training	-0.396	0.054	0	1	2	1.84735	0	1.23637	0.07616	0	232.23	2.0945	2.2045	2.3545	0.0408	0.3102
183	Test	0.105	0.07	0	2	2	3.36423	0	0	0.09582	0	312.32	4.2269	2.6439	2.4073	0.0205	-0.4841
185	Test	0.049	0.068	1	3	3	2.94078	0	0	0.08734	0	323.34	4.2669	1.5096	2.1285	0.0331	1.2745
186	Training	-0.01	0.062	0	4	4	3.49861	1	0	0.11648	0	301.32	2.7194	2.4221	2.0047	0.0594	-0.8714
187	Training	-0.173	0.046	2	1	5	5.33173	0	0	0.08896	0	502.95	7.5028	3.2848	2.9518	0.0598	-0.6956
189	Training	-0.109	0.098	0	0	3	3.29389	0	1.67361	0.12297	0.25	296.56	4.4497	2.283	1.8843	0.0725	-0.8381
190	Training	-0.144	0.055	0	0	0	8.20757	2	0	0.03961	0	246.36	3.4133	4.9143	4.2848	0.0781	-1.3277
193	Training	0	0.056	0	0	0	0.659337	0	0	0.10505	0	96.09	0.9846	3.1697	2.2492	0.0433	-1.9056
195	Test	-0.007	0.047	1	0	6	3.13068	3	0	0.08331	0	345.78	3.9734	2.6845	2.3912	0.0612	-0.6129
199	Training	-1.031	0.124	2	0	0	8.6058	0	0	0.08112	0	373.3	4.2377	3.97	3.8903	0.1496	-0.175
202	Training	-0.181	0.054	3	0	2	2.79243	6	2.09034	0	0	203.39	3.3986	2.2291	2.2206	0.0459	-0.0176
203	Training	-0.071	0.067	6	0	2	3.53458	5	1.32556	0	0.25	252.36	2.601	2.174	2.1632	0.0543	-0.0225
205	Training	-0.058	0.031	0	3	6	5.0596	2	0	0.08058	0	494.53	6.7127	2.6407	2.7753	0.0798	0.2841
206	Training	0	0.142	0	0	2	0.646968	0	0	0.05635	0	99.1	-0.432	1.503	1.7646	0.1599	0.5779
207	Training	-0.065	0.054	1	0	3	3.22289	2	0	0.08516	0	297.2	3.35	3.117	2.6016	0.024	-1.0564
209	Training	-0.231	0.041	0	1	6	2.56434	3	1.84187	0.0742	0.5	255.69	1.7669	2.7949	1.9563	0.0541	-1.746
212	Training	-0.316	0.094	0	0	3	3.04112	0	1.10957	0.09542	0.25	286.12	3.6623	1.4565	2.2322	0.0401	1.6031
214	Training	-0.18	0.085	1	0	6	3.16422	1	0.957263	0.05855	0.696238	330.19	2.8767	1.9747	2.1497	0.0336	0.3605
221	Test	-0.153	0.047	0	2	0	2.80039	0	0	0.14431	0	289.54	5.116	1.8934	2.3847	0.0508	1.0211
222	Training	0	0.071	6	0	0	5.85671	0	0	0	0	290.82	4.1574	3.4636	3.3698	0.179	-0.2097
223	Training	-0.149	0.047	0	1	3	2.46976	0	1.15769	0.07513	0	249.11	2.3269	2.3372	2.4154	0.0289	0.1608
224	Training	0.03	0.06	2	0	0	7.77814	3	0	0	0.2	330.4	1.8946	3.0566	4.0435	0.0654	2.067
226	Training	-0.161	0.045	1	0	0	2.02359	0	0	0.06647	0.5	214.66	3.0112	2.3105	2.7825	0.0425	0.9767
231	Training	-0.132	0.068	1	0	5	3.1465	1	1.44444	0.0357	0.2	279.37	2.3766	2.6933	2.4011	0.0267	-0.5998
232	Training	0.209	0.094	0	0	0	1.53311	0	0	0	0	176.24	0.1176	2.89	2.6978	0.0709	-0.4038
234	Test	0.532	0.062	0	0	3	7.95933	1	1.66014	0	0	302.37	2.3577	4.1794	3.6589	0.1432	-1.1386
236	Training	-0.417	0.028	0	0	2	1.422	0	0	0	0	162.24	0.6522	4.0428	3.3188	0.0734	-1.5229
237	Training	-0.038	0.062	0	0	0	3.88025	0	0	0.08327	0	345.66	4.9695	2.2702	3.0742	0.021	1.6453
238	Test	0.07	0.071	0	4	8	4.30453	0	1.39133	0.04526	0.2	368.52	4.451	1.8675	2.0102	0.1162	0.3074
239	Training	-0.31	0.062	0	1	2	1.3661	0	0	0.07308	0	151.18	0.9388	1.7155	2.444	0.0253	1.494
242	Training	0	0	0	0	0	0.273861	0	0	0	0	73.13	1.0128	3.0067	3.2195	0.113	0.4576
243	Training	0.002	0.028	8	0	0	2.13239	8	0	0	0	170.33	3.6163	1.5322	2.1859	0.1193	1.4105
244	Training	0.04	0.031	0	0	0	1.44796	1	0	0	0	130.21	1.2561	3.3742	3.1693	0.0561	-0.4271
246	Training	-0.223	0.069	2	0	5	3.40341	3	1.94136	0.03182	0	283.83	3.5765	2.1106	2.2092	0.0335	0.2032
248	Training	-0.312	0.08	0	1	7	2.39948	0	1.17162	0	0	214.33	1.4663	2.2896	2.4315	0.0653	0.2972
249	Training	-0.17	0.068	5	0	3	5.54568	6	1.6025	0.00939	0.25	275.43	3.1272	1.9928	2.5071	0.0402	1.0629
251	Training	-0.37	0.039	4	0	2	2.9259	7	2.13284	0	0	187.34	2.5033	2.7055	2.2781	0.0613	-0.8933
254	Training	0	0	0	0	2	0.331208	0	0	0.13333	0	69.08	-0.41	1.5963	2.3223	0.0999	1.5496
256	Test	0.266	0.023	0	2	7	2.52577	1	0	0.10476	0	225.28	1.6937	2.0253	2.1159	0.0789	0.1911
257	Training	0.081	0.043	1	2	0	2.22161	1	0	0.08742	0.5	186.22	2.3776	2.27	2.3155	0.0415	0.0941
258	Test	0.078	0.05	1	0	3	3.47626	2	1.7875	0.04751	0	271.39	3.2762	1.7346	2.4581	0.0339	1.4905
262	Training	-1.402	0.067	0	0	3	1.79692	0	0	0.16163	0	230.9	3.5139	2.3903	2.4803	0.1973	0.2034
264	Training	0	0.089	2	0	2	1.30992	3	1.76389	0	0	99.15	-0.1649	1.5191	1.8939	0.0536	0.7802
265	Test	-0.05	0.057	0	0	9	2.97157	0	0.99071	0.10434	0	303.69	2.0238	1.5793	2.0556	0.0895	1.0107
268	Training	0.004	0.044	6	0	3	3.23408	7	2.12945	0.01218	0	213.38	3.1584	2.5887	1.8414	0.0636	-1.5637
269	Training	0.23	0.036	0	0	1	2.7932	1	0	0	0.2	213.22	-0.3334	3.8516	3.2763	0.0497	-1.1952
270	Training	-0.093	0.048	0	3	0	1.98884	0	0	0.08894	0	170.22	3.081	1.93	2.3793	0.0479	0.9326
272	Training	-0.102	0.057	2	0	9	3.40689	4	1.53351	0.04878	3.11433	346.41	2.3542	1.5395	1.5799	0.3031	0.098
273	Training	-0.171	0.059	1	0	6	3.37965	0	1.36715	0.04328	0	345.25	5.2245	1.994	2.5385	0.0521	1.1324
274	Training	-0.24	0.067	0	0	8	3.13614	3	1.31616	0.04258	0.2	278.34	1.9155	2.175	2.2397	0.0604	0.1351
278	Test	0.213	0.042	0	0	0	3.93989	3	0	0	0.166667	246.32	0.2442	3.9143	3.4346	0.0639	-1.0041
281	Training	0	0.036	0	0	0	1.3075	0	0	0.12698	0	147	3.1588	2.4683	2.4175	0.0522	-0.1057
282	Training	-0.1	0.045	0	0	2	1.10301	0	0	0.12762	0.721125	139.12	1.457	2.838	2.1388	0.0561	-1.4572
284	Training	-0.19	0.054	3	0	2	2.96869	6	2.06604	0	0	203.39	3.3311	2.344	2.2693	0.045	-0.1547
286	Test	-1.671	0.08	0	0	2	3.80009	0	0	0.2349	0.5	295.32	5.0464	2.4289	2.4993	0.3477	0.1766
289	Training	-0.286	0.066	0	0	0	4.81392	1	0	0.07138	0	391.31	5.4387	3.0093	3.3645	0.029	0.7298
291	Training	0.009	0.058	0	5	4	2.74085	0	0	0.08	0.125	300.34	3.42	1.8755	1.9992	0.083	0.2616
292	Training	0.571	0.076	0	0	2	8.2873	1	1.4185	0.05963	0.25	317.35	1.9558	3.5353	3.3338	0.1263	-0.4366
294	Training	-0.154	0.054	7	1	3	3.20089	7	1.78361	0	0.166667	229.36	1.9418	1.6844	1.7357	0.0701	0.1077
295	Training	-0.083	0.068	0	2	5	2.40994	0	0	0.16347	0.5	241.46	2.1681	1.4691	1.6492	0.0533	0.3747
298	Training	0.148	0.041	5	0	4	4.65773	7	2.51925	0.03484	0	330.28	4.51	2.1208	1.9416	0.0805	-0.3785
299	Training	-0.366	0.05	0	0	3	2.28189	0	1.35339	0.04153	0	238.33	2.0119	3.3771	2.7166	0.0376	-1.3633
300	Training	-0.13	0.06	0	0	5	4.94087	2	2.09281	0.03818	0	305.38	2.7347	2.3879	2.7635	0.0538	0.7819
302	Training	-0.44	0.076	2	0	4	1.63302	0	0	0.03833	0	225.34	2.5623	2.6512	2.4775	0.0598	-0.3627
303	Training	-0.35	0.076	2	2	4	2.18074	0	0	0.03624	0	241.41	3.1205	2.0604	2.3339	0.049	0.5677
304	Training	-0.024	0.076	1	0	5	2.1624	1	1.87423	0.04697	0	211.71	2.6276	2.4744	1.9353	0.0456	-1.1175
305	Test	-0.187	0.051	1	1	3	2.2635	1	0	0.07537	0	218.09	2.9461	2.7739	2.4557	0.017	-0.65
306	Test	-0.432	0.085	2	2	4	1.6127	0	0	0.04544	0	229.75	2.9132	1.7768	2.1151	0.0589	0.7061
307	Training	-0.299	0.042	1	1	0	1.61861	0	0	0.04833	0	209.27	2.3035	3.7079	2.8173	0.041	-1.8415
309	Training	-0.093	0.043	1	1	5	3.22029	0	0	0.06728	0	291.81	3.0987	2.8316	2.6902	0.0375	-0.2919
310	Training	-0.412	0.068	0	0	4	2.34805	0	0	0.08947	0	256.14	4.1416	1.8834	2.5706	0.0346	1.4161
313	Training	-0.205	0.031	0	0	11	1.98603	1	1.31481	0.06173	0	217.26	-0.2184	1.572	2.1039	0.1318	1.1559
316	Test	0.08	0.059	0	0	8	5.31216	1	1.64834	0.03471	0	364.98	4.4311	2.8063	2.7803	0.0914	-0.0553
318	Test	0.094	0.039	6	0	5	4.68398	7	0	0.05536	0	378.96	7.1551	2.2841	2.2731	0.1046	-0.0235
322	Training	-0.053	0.065	0	3	3	2.50419	0	0	0.15508	0.5	242.06	2.9495	2.0435	1.7233	0.057	-0.6676
324	Test	0.093	0.036	1	0	6	3.69481	1	0	0.0943	0	372.83	4.6883	2.4012	2.618	0.064	0.4537
325	Training	0.093	0.036	1	0	6	3.69481	1	0	0.0943	0	372.83	4.6883	2.4989	2.618	0.064	0.2494
327	Test	-0.144	0.044	3	0	0	5.86899	2	0	0.06842	0	394.45	3.9307	3.8178	3.3888	0.0411	-0.887
329	Training	0.014	0.073	6	3	3	4.814	7	0	0.00871	0.25	327.54	3.1302	2.0101	2.0715	0.0952	0.1309
330	Training	0.05	0.045	5	6	4	3.45963	4	0	0.03155	0	232.36	3.1239	1.6671	1.7151	0.1574	0.1058
331	Test	-0.532	0.062	0	2	2	1.44693	2	0	0.06105	0	201.69	2.1582	2.3174	2.3808	0.0621	0.1326
336	Test	-0.353	0.085	0	0	0	7.71147	4	0	0	0	322.36	2.4403	4.8093	4.1427	0.13	-1.4471
337	Training	0.005	0.044	8	0	3	2.95296	10	2.0276	0	0	197.36	2.9886	1.9834	1.5032	0.1019	-1.026
338	Training	0.003	0.033	12	0	3	3.95296	14	2.04638	0	0	253.48	4.8134	1.7049	1.1911	0.2247	-1.1816
339	Training	-0.061	0.046	2	1	4	4.27871	3	0	0.0485	0	307.86	3.6322	1.963	2.7854	0.0275	1.6886
341	Training	0.05	0.073	1	3	9	4.27574	2	0	0.04424	0	333.9	4.5772	2.7491	2.1862	0.1116	-1.2093
342	Training	0.106	0.058	0	1	3	3.28682	0	1.58298	0.03183	0	228.36	1.4332	2.5497	2.5758	0.0448	0.0542
345	Test	-0.402	0.101	0	3	6	2.33358	0	1.28627	0.02202	0.25	216.69	1.008	2.1053	1.9185	0.0866	-0.3959
346	Training	-0.432	0.085	0	2	4	1.59885	1	0	0.04544	0	229.75	2.7407	2.0952	2.2388	0.0553	0.2992
347	Test	-0.35	0.076	0	2	4	2.16688	1	0	0.03624	0	241.41	2.948	2.072	2.4576	0.0428	0.798
348	Test	0.137	0.058	0	0	0	3.59412	0	0	0.10484	0	365.96	3.5293	1.9614	2.8407	0.0285	1.8064
351	Training	-0.286	0.099	4	0	2	5.3212	5	1.08252	0.02013	0.572357	331.45	3.4492	1.8538	2.49	0.0562	1.3259
352	Test	-0.019	0.033	0	2	8	2.65078	0	0	0.12237	0	201.27	2.1546	1.9857	2.0816	0.0804	0.2025
353	Test	-0.175	0.037	0	0	4	3.38857	3	2.25638	0.06931	0	252.75	2.6236	2.7553	2.3819	0.0654	-0.782
355	Training	0.194	0.052	0	3	6	2.20979	0	0	0.11375	0	220.28	1.1923	1.6146	1.7937	0.0539	0.373
356	Training	0.139	0.037	0	0	2	3.532	3	1.98585	0.04203	0	257.81	3.7266	2.4475	2.6239	0.0575	0.368
358	Training	-0.275	0.054	0	4	4	2.63369	0	0	0.05556	0.0909091	342.44	2.7154	1.7124	2.3924	0.0635	1.4229
359	Training	-0.221	0.038	0	0	0	4.20304	0	2.4291	0	0	240.48	3.1558	2.6327	3.3612	0.1334	1.5844
363	Training	-0.271	0.058	0	0	3	3.82557	0	1.31968	0.06391	0.5	347.29	5.4692	2.5407	2.7781	0.0356	0.4894
365	Training	-0.389	0.066	2	0	1	9.69617	0	0	0.06009	0	665.02	7.0336	3.8272	4.3897	0.1023	1.2022
366	Training	-0.224	0.043	0	0	4	2.9537	0	0	0.06896	0	293.78	3.4939	2.9081	2.9451	0.0317	0.0763
367	Test	0.36	0.083	2	0	4	3.8725	1	2.11004	0.01818	0	304.69	3.96	2.5808	2.1938	0.0917	-0.8222
369	Test	-0.227	0.042	6	0	0	8.57577	9	0	0	0	314.57	5.8689	3.3215	3.7494	0.1326	0.9302
370	Training	-0.138	0.083	0	0	0	2.31157	0	0	0	0.333333	257.44	0.7531	2.7574	3.0578	0.0511	0.6243
371	Training	0	0.071	0	0	0	1.87526	0	1.12176	0	0.75	232.41	1.1076	2.7577	2.6955	0.0699	-0.1307
373	Test	-0.073	0.049	0	0	2	2.13064	1	0	0.14385	0.5	256.47	3.074	2.6097	2.1976	0.0519	-0.8572
375	Test	-0.205	0.058	0	0	3	2.06539	1	0	0.09737	0	247.54	2.6664	2.3614	2.4485	0.0301	0.1792
True external set
ID	MATS6v	JGI3	nCs	CATS2D_04_DL	F02[C-N]	VP-3	nssCH2	minsssN	ETA_dEpsilon_B	MDEO-11	MW	ALOGP	Predicted pLD50	HAT i/i (h*=0.2120)
2	0.726406	0.0416667	0	0	0	1.24995	0	0	0.09432	0.2	134.14	1.3488	2.2382	0.0724
4	-0.396737	0.0730994	2	0	3	3.38876	3	2.15162	0.04736	0	207.32	2.9099	2.6981	0.0363
6	0.0084047	0.0579861	18	0	2	13.661	9	2.21723	0.00787	0.166667	746.1	4.9172	3.3707	0.8037
7	0.61416	0.0833333	0	0	1	0.423607	2	0.930556	0	0.25	91.13	-0.7819	2.1573	0.1061
14	0.470186	0.0729167	0	2	0	1.28334	0	0	0.07685	0.25	136.16	1.3025	1.9651	0.0518
16	0.0280888	0.0842593	0	0	2	2.63113	0	1.93981	0.08102	0	165.23	1.5812	2.4955	0.0295
17	0.595393	0.115741	0	2	7	1.23731	1	0	0.04729	0	126.18	0.3509	1.3247	0.1737
19	-0.219255	0.064951	2	1	4	4.99045	3	0	0.06059	0	317.85	3.3974	2.7922	0.0291
20	0.0305165	0.0375	2	2	1	1.52331	4	0	0.03863	0	281.11	2.2675	2.2397	0.0445
21	0	0.0989583	0	0	0	3.20495	0	0	0.14679	0	187.07	2.3891	2.2438	0.0754
22	-0.0209573	0.0730994	6	0	3	4.38059	7	2.28532	0.01594	0	282.26	4.543	2.3388	0.0884
23	0	0.0375	0	0	4	0.706104	0	0	0.08745	0	94.13	-0.0672	2.2799	0.0447
27	-0.0800391	0.0487805	11	0	0	5.19684	11	0	0.02797	0.564622	384.56	6.6944	2.0511	0.2013
28	-0.168182	0.0416667	0	0	5	2.1962	1	1.92562	0.05975	0	222.7	1.6036	2.6997	0.0412
29	-0.422736	0.0451389	0	0	4	3.04586	0	0	0.11384	0	210.3	2.4168	2.7617	0.043
30	0.10795	0.0682099	10	7	2	10.587	8	0	0.03248	1.30417	593.73	2.1505	2.2361	0.4546
31	-0.228758	0.0416667	0	0	2	2.38706	0	0	0	0	190.3	1.1675	3.3552	0.0483
34	0	0.03125	1	1	0	0.745096	2	0	0	0.333333	110.55	-0.2045	2.709	0.0595
37	-0.0828956	0.0943287	0	2	10	2.02725	0	0.750579	0	0.25	241.34	0.7644	2.0844	0.1472
38	0.232327	0.065625	0	2	2	2.06474	0	2.0129	0.04359	0	208.29	2.242	2.4087	0.0296
39	-0.520106	0.0519324	2	1	6	2.29934	2	0	0.07292	0	227.67	1.5056	2.2813	0.0533
42	-0.052051	0.0576172	10	3	5	6.48222	6	0	0.02082	1.96969	548.7	4.309	1.8846	0.3114
44	-0.135947	0.0434783	0	0	3	3.87171	0	0	0.10818	0	403.42	3.6836	2.935	0.0312
50	0	0.00625	19	0	0	4.86536	19	0	0.00376	0	322.69	10.4196	1.2461	0.6249
51	0.164614	0.066376	2	4	9	5.57011	2	0	0.08817	0	398.26	4.1266	2.0043	0.1348
52	0.0931844	0.0263158	0	0	0	2.22225	1	0	0.085	0	212.26	3.2689	2.8502	0.0407
54	-0.215443	0.0507246	0	0	2	4.25657	2	0	0.08598	0	251.35	2.3965	3.0661	0.0327
55	0.125868	0.0375	1	6	4	2.94857	0	0	0.06296	0	300.39	3.6794	2.0574	0.1411
56	-0.164842	0.0372299	1	0	4	4.07301	0	0	0.06632	0	337.46	4.101	3.1395	0.0436
57	0.122282	0.0516796	0	2	9	4.50813	0	0	0.13039	0	414.23	5.1938	2.1948	0.1054
58	0.0714445	0.0464286	0	5	5	3.88737	0	0	0.11778	0	343.22	4.5205	2.0535	0.0947
60	0.0547618	0.0416667	2	8	0	6.83091	1	0	0.09143	0.572357	527.43	6.6328	2.5189	0.3358
61	0.41817	0.0703125	0	0	8	5.19551	0	1.20715	0.14278	1.44225	577.94	6.5623	2.1391	0.1419
62	-0.149379	0.0336538	0	0	1	1.71858	0	0	0.11624	0.5	228.05	2.9349	2.5358	0.0518
66	-0.213313	0.0340909	4	0	0	1.61673	5	0	0	0	190.32	1.4639	2.6678	0.0614
69	-0.253953	0.0787037	2	0	3	6.16645	2	1.8633	0.03102	0.25	349.07	3.5113	3.3513	0.0342
72	-0.310362	0.0729167	1	1	0	2.46176	1	0	0.0476	0	221.28	2.2344	2.7183	0.0285
75	-0.216616	0.0833333	0	0	5	4.15056	2	0	0.09934	0	407.63	5.665	2.5426	0.0624
78	-0.0424502	0.05	1	0	0	1.69181	0	0	0.07973	0.5	200.63	2.525	2.5423	0.0409
83	0.036961	0.0208333	0	0	0	1.16682	0	0	0.08148	0	132.17	1.9496	2.7591	0.0527
85	0.121052	0.062963	0	0	3	2.52971	1	0	0.06754	0.5	249.71	1.3125	2.5011	0.0236
88	-0.36018	0.0686728	0	0	6	3.60976	0	1.22848	0.08346	0.5	324.82	3.0686	2.6909	0.0391
89	-0.145925	0.0584936	3	0	15	6.3154	2	0	0.08961	0.166667	602.13	5.9867	2.3816	0.3268
91	0.0135412	0.061854	3	3	4	3.97669	4	0	0.08773	0	412.39	4.9877	1.9336	0.0516
92	0.0437833	0.0723684	0	0	1	4.99613	2	0	0.06179	0.25	447.49	5.1221	3.1329	0.035
93	0.0119819	0.057412	18	0	2	13.748	10	2.21837	0.0076	0.166667	760.13	5.266	3.3341	0.7589
98	-0.0847275	0.0486111	2	4	6	2.61091	2	0	0.06818	0	225.32	3.4454	1.8645	0.0683
102	0	0.0277778	1	0	2	1.5861	0	0	0	0	241.87	0.7031	3.0949	0.065
112	-0.245488	0.0451389	1	0	0	2.07591	0	0	0.09031	0.5	235.07	3.1894	2.685	0.0486
113	0.724592	0.0416667	0	0	0	1.21126	0	0	0.04799	0	220.98	0.4737	2.5312	0.073
116	-0.182621	0.0564024	0	1	9	3.86861	1	0	0.1392	0.5	406.25	4.0695	2.0859	0.0855
122	0.0731952	0.0380859	2	4	0	8.65634	2	0	0.08467	0.25	539.51	8.6685	3.4546	0.1456
124	-0.513731	0.0526316	0	0	0	3.94019	0	0	0.06893	0.5	422.03	2.4583	3.3776	0.0519
127	0	0	0	0	0	1.1236	0	0	0	0	94.22	1.3858	3.4109	0.1083
130	-0.0254359	0.0719136	0	0	0	4.81721	0	0	0.09071	0.75	340.39	4.0852	3.0694	0.0461
133	-0.30588	0.065407	1	0	4	4.3452	1	0	0.05616	0.166667	401.46	5.4043	3.0217	0.0237
135	-0.0586572	0.0735294	0	3	1	4.089	1	1.29886	0.08585	1.42381	492.49	3.2712	2.3722	0.1272
136	-0.27852	0.0655637	0	0	0	4.76929	1	0	0.05181	0	350.49	5.5466	3.4717	0.0286
138	-0.181638	0.0689815	0	2	5	3.51213	0	0	0.15313	0	349.54	5.2589	2.0518	0.0479
140	-0.222108	0.110833	1	0	0	8.59801	2	0	0.04244	0.5	422.92	2.2374	3.8053	0.1014
144	-0.0277477	0.0525794	2	3	7	4.78998	2	0	0.05429	0	320.48	2.9433	2.4496	0.0719
151	0.132614	0.0400641	0	0	0	4.55578	3	0	0.05864	0	376.53	6.0243	3.2903	0.0517
152	-0.0538039	0.0595238	1	0	3	4.36607	2	0	0.05846	0	359.45	5.5205	2.9718	0.0224
153	-0.00331326	0.0580247	0	3	6	4.48399	0	0.892573	0.09212	0.25	374.42	4.7179	2.4388	0.0483
154	-0.0552813	0.0655864	0	3	9	4.30225	0	1.66641	0.06657	0	311.44	3.9764	2.3735	0.0984
157	-0.0416289	0.0377859	2	0	5	4.44457	3	0	0.08137	0	336.85	4.2953	2.7463	0.0506
158	0.0479517	0.0524194	5	4	3	4.68733	5	0	0.04327	0.142857	302.22	4.5551	2.0873	0.0817
161	0.111203	0.0494048	1	0	2	3.52624	1	0	0.09262	0	361.8	4.7523	2.7068	0.0238
162	-0.0589249	0.0264423	0	1	1	2.7182	3	0	0.06774	0	301.37	3.5582	2.8258	0.051
168	-0.0171968	0.078869	0	2	5	3.20244	0	0	0.12213	0.944941	407.37	2.2162	1.9111	0.0489
170	-0.0196944	0.0637255	0	3	9	4.17986	0	0	0.19656	1.44225	465.11	5.7708	1.3954	0.1551
172	-0.0487429	0.0686728	0	1	3	2.5847	0	0	0.14414	0	248.2	4.1234	2.0802	0.0361
173	-0.0974752	0.05625	1	0	1	3.21432	2	0	0.13646	0.5	291.72	1.5684	2.3422	0.0519
174	0.277235	0.0625	1	0	8	3.73854	1	1.38525	0.09809	0	363.37	3.624	2.214	0.1056
175	0.105021	0.0611111	0	0	7	3.70063	2	0.528663	0.08254	0.111111	408.76	3.9494	2.4551	0.073
177	-0.122421	0.0563492	0	1	9	3.04778	0	0	0.14882	0.5	325.33	2.5106	1.8803	0.0862
179	-0.116907	0.0659722	0	6	5	3.80812	1	0	0.14554	0	383.59	4.835	1.6138	0.14
180	-0.160733	0.0416667	0	0	7	4.37587	2	0	0.11383	0	458.86	5.2654	2.6902	0.0829
181	-0.131426	0.0422705	0	0	6	2.79701	3	1.4597	0.09016	0	288.7	1.9789	2.4555	0.074
182	-0.28175	0.0496795	0	0	2	3.74042	0	1.67989	0.11002	0	329.34	3.6448	2.9626	0.0288
184	-0.0315939	0.0548433	2	0	8	6.00559	5	1.81702	0.05163	0.0909091	403.92	4.7172	2.8381	0.1245
188	0.106883	0.0561869	0	3	9	3.77877	0	0	0.13679	0	381.33	4.276	1.8425	0.1032
191	0.103543	0.0384615	2	0	2	3.25796	6	0	0.05251	0	356.65	4.5228	2.5753	0.0752
192	-0.161105	0.0526316	1	4	0	3.86185	1	0	0.08308	0.572357	308.35	2.6622	2.4832	0.0917
194	0.243949	0.078125	0	0	2	1.55435	0	0	0.16171	0.721125	207.12	2.3993	1.6436	0.0831
196	0.178871	0.0714286	0	0	1	0.753126	2	0	0	2.58641	169.09	-2.0671	2.2176	0.2934
197	-0.20932	0.0576923	0	1	6	3.58857	0	0	0.11625	0	345.17	3.6815	2.452	0.0413
198	-0.115155	0.0410714	1	0	2	3.10441	0	0	0.12471	0.5	361.72	4.416	2.5761	0.0456
200	-0.00720792	0.0147059	10	0	0	3.12813	11	0	0.0131	0	280.5	5.935	2.0676	0.1861
201	-0.108972	0.0704787	0	7	3	3.72672	0	0	0.15063	0.25	461.16	5.6148	1.5499	0.1914
204	-0.0147158	0.0636905	8	3	4	6.19029	5	1.54845	0.03405	0.25	352.92	4.8921	2.1903	0.1415
208	-0.107208	0.0844638	0	2	8	3.86686	0	0	0.11657	0.944941	412.85	2.1859	1.9174	0.07
210	0.08709	0.0509259	3	3	3	2.51168	3	0	0.06296	0.5	203.26	2.6751	1.8629	0.0415
211	-0.106895	0.0642094	1	0	7	5.64628	2	0.563026	0.08707	0.474957	527.87	5.8264	2.7906	0.0631
213	0.0361113	0.0629085	3	3	4	5.50911	4	0	0.04424	0	333.9	4.0142	2.5214	0.057
215	-0.295765	0.0732639	3	2	5	2.45389	2	0	0.03598	0	253.42	3.0889	2.1239	0.0493
216	-0.239726	0.075	2	3	2	5.10747	1	0	0.03094	0	345.44	3.7014	2.9189	0.0485
217	-0.155836	0.0740132	1	4	4	4.89153	0	0	0.04322	0.2	359.53	4.7256	2.666	0.0709
218	-0.0796344	0.0428571	1	0	3	3.71932	2	0	0.06938	0	295.36	3.3851	2.8991	0.0243
219	-0.0790151	0.0575142	2	0	2	3.73909	2	0	0.1007	0.814325	359.35	3.0599	2.4686	0.039
220	-0.229684	0.0578704	1	0	1	5.42593	0	0	0.08369	0	449.88	5.8977	3.3786	0.0289
225	-0.0798619	0.0411585	2	4	2	4.24815	4	0	0.08701	0	411.91	5.8566	2.2812	0.0771
227	-0.131948	0.0683594	1	0	5	3.1465	1	1.44444	0.0357	0.2	279.37	2.3766	2.7202	0.0334
228	0.132367	0.0633681	0	2	4	4.11445	1	0	0.11535	0	397.81	4.2406	2.3251	0.034
229	-0.0961033	0.0673077	3	0	2	3.95535	3	0	0.06045	3.71139	339.35	0.8339	2.1862	0.5094
230	-0.0653899	0.0416667	1	5	7	4.6159	1	0	0.11976	0	506.44	7.2123	2.0296	0.1165
233	-0.15379	0.064951	3	1	4	5.48209	4	0	0.0482	0	319.87	3.5799	2.7959	0.0384
235	0.360646	0.0714286	0	2	0	3.10484	0	0	0.04556	0	225.34	3.1078	2.6482	0.0401
240	0	0	0	0	0	0	0	0	0	0	94.94	0.9911	3.1579	0.1152
241	0.00478569	0.0582483	20	0	2	13.8182	12	2.22218	0.00387	0.166667	748.12	5.2642	3.0595	0.8643
245	-0.230471	0.0863821	0	0	0	4.49039	2	0	0.05621	0	360.38	4.166	3.1427	0.0483
247	-0.289372	0.0651596	0	0	0	4.92098	0	0	0.06252	0	409.3	4.8894	3.5101	0.0265
250	0.0293518	0.062963	13	4	0	9.5002	8	0	0.02122	0.655185	542.78	4.3701	2.4054	0.3852
252	0.00272498	0.0588488	18	0	2	13.2527	9	2.21553	0.00816	0.166667	732.07	4.4708	3.2727	0.7907
253	0.430095	0.0868056	3	0	2	3.06908	3	2.02231	0.02723	0	155.24	1.1171	2.2695	0.0701
255	0	0	0	0	0	0.210819	0	1.44444	0	0	73.11	-0.4673	3.2053	0.1135
259	-0.395753	0.0949074	2	0	0	1.10531	2	0	0	0	116.13	1.3841	2.5301	0.0819
260	0.180929	0.046875	4	1	0	2.67429	4	0	0.02133	0	222.41	4.562	2.4602	0.038
261	-0.0839179	0.0511364	0	0	6	3.86301	1	0	0.07837	0	408.41	4.4227	2.8004	0.0492
263	0	0.111111	2	0	2	1.32967	4	2.36111	0	0	85.17	0.7811	2.0612	0.1258
266	0.00340945	0.0714286	0	6	3	3.64936	0	0	0.14505	0.25	492.73	6.7991	1.6346	0.1374
267	-0.0801226	0.0789474	1	6	3	4.22048	0	0	0.15981	0.25	529.16	6.7439	1.5573	0.1509
271	-0.130385	0.0712209	0	4	5	3.59304	0	1.30891	0.07574	1.31037	424.49	1.1569	2.0937	0.1078
275	-0.50444	0.0514706	0	0	3	1.83393	0	1.42382	0	0.166667	219.3	0.2121	3.1902	0.0579
276	0.0676797	0.0493173	4	0	17	7.56896	6	1.65975	0.07857	0	539.58	4.7467	2.2835	0.4918
277	0.722996	0.0491453	1	0	3	2.56465	5	2.27083	0	0	143.21	0.4175	2.4982	0.1244
279	0.00919023	0.0426955	3	1	5	3.63824	1	0	0.05326	0	293.83	3.3485	2.5807	0.059
280	-0.00184774	0.0611979	2	0	3	5.10406	1	1.10396	0.04953	0	400.52	3.2799	3.1245	0.032
283	-0.345939	0.0572917	0	0	2	4.321	2	0	0.05674	0.5	291.29	2.9029	3.1975	0.0381
285	0.0064487	0.03125	7	1	0	1.7442	7	0	0	0.5	158.27	3.1742	2.0446	0.0991
287	-1.89232	0.0714286	0	2	0	3.44343	0	0	0.21851	0	266.32	4.8846	2.6028	0.4005
288	0.173963	0.0698529	1	2	9	4.70622	1	0	0.05306	0	359.46	4.7365	2.3867	0.1101
290	0.00711291	0.0178571	9	0	0	2.71146	10	0	0.00788	0	240.43	5.011	2.1296	0.1545
293	-0.106675	0.0740741	1	0	4	4.63004	1	0	0.0318	0	318.42	3.1093	3.1044	0.0341
296	-0.0203241	0.0480769	0	0	3	3.33808	1	0	0.10244	0	367.35	3.7112	2.7062	0.0276
297	-0.108759	0.0622428	2	0	8	5.34245	6	1.65907	0.0294	0.166667	400.57	5.0625	2.7261	0.1414
301	-0.129632	0.0774457	0	3	3	3.47973	0	0	0.12224	1.42381	468.38	3.3846	1.9636	0.1094
308	0	0	1	0	0	0.302451	1	0	0	0.5	74.09	0.437	3.0112	0.1136
311	-0.159725	0.0659722	3	2	4	5.17713	4	2.06399	0.04764	0	344.29	3.3869	2.6036	0.0405
312	-0.0288942	0.0707672	2	0	10	4.58968	1	1.18708	0.07976	0	426.7	4.8917	2.3685	0.1468
314	-0.17828	0.0399306	0	0	10	4.01674	1	1.07688	0.09182	0	387.85	4.6425	2.6519	0.1319
315	0.146851	0.0628472	0	0	6	3.70388	2	0	0.09932	0	413.2	5.144	2.3954	0.0683
317	-0.101804	0.05	1	0	2	4.17823	4	0	0.11644	0	491.13	6.509	2.6106	0.0641
319	-0.179684	0.0706967	0	2	10	4.76179	2	0.56939	0.1027	0.25	464.38	3.1434	2.1854	0.1128
320	0.351659	0.0625	0	4	6	2.01221	0	0	0.07714	0	199.28	2.6876	1.7022	0.0789
321	-0.158388	0.025	1	0	2	3.24703	1	0	0.08441	0	321.4	4.772	2.9892	0.0378
323	-0.133812	0.0544355	0	0	3	3.27787	0	0	0.15133	0	308.14	5.1108	2.4585	0.0469
326	-0.104986	0.0736111	0	2	5	4.01734	1	0	0.08936	2.34841	431.5	1.1487	2.1366	0.1965
328	0.00895794	0.0540123	3	3	9	4.46007	3	0	0.06053	0	331.4	3.5519	2.0442	0.1104
332	-0.222769	0.06875	2	0	5	3.40341	3	1.94136	0.03182	0	283.83	3.5765	2.6437	0.0462
333	0.0867034	0.082702	5	0	0	5.36189	5	0	0.02994	0.166667	370.53	5.6369	2.7244	0.0608
334	-0.103589	0.0600845	5	2	4	5.47108	5	0	0.03592	0.166667	373.49	3.5421	2.4938	0.0537
335	0.151833	0.0576389	7	0	3	5.33475	9	2.47999	0	0	297.54	3.7831	2.4822	0.1223
340	0.00743105	0.0609375	1	4	8	4.18027	1	1.41397	0.04287	0.2	352.52	4.9236	2.2545	0.0981
343	-0.416865	0.0759259	0	0	0	4.86746	1	0	0.0829	0	418.76	5.673	3.2845	0.0388
344	-0.0321847	0.0747283	3	0	0	4.8563	5	0	0.05481	1.73206	440.85	2.4153	2.5702	0.1534
349	0.158996	0.0479601	0	0	4	3.56978	2	0	0.1136	0	372.17	4.0338	2.5025	0.0501
350	-0.0175319	0.0486111	1	0	3	2.26145	3	0	0.03667	0.5	160.22	0.4009	2.5759	0.0326
354	-0.343795	0.060239	1	0	6	4.59856	3	0	0.05289	0	396.42	4.9252	2.9384	0.0618
357	0.113236	0.0384615	0	0	4	3.97333	0	1.44844	0	0.166667	354.53	2.1022	3.4651	0.0653
360	-0.0617148	0.0179094	0	0	4	3.04783	0	0	0.12639	0	228.29	3.0986	2.7499	0.0667
361	0.131384	0.0677083	0	0	0	4.77307	0	0	0.06827	0	301.14	4.1259	3.2526	0.0263
362	-0.0885189	0.0572917	1	3	9	4.63581	2	0	0.07143	0	383.91	5.2232	2.2813	0.0994
364	-0.402105	0.0416667	0	1	2	2.1422	0	1.27995	0.05168	0.5	214.32	1.8152	2.8796	0.0415
368	-0.379453	0.0517241	0	0	5	3.33895	2	1.45965	0.02487	0.142857	314.46	2.6366	3.0959	0.0521
372	0.113775	0.0625	0	0	0	1.39605	0	0	0.17633	0	229.47	2.0847	1.8933	0.0848
376	-0.0675562	0.0769928	0	0	10	4.18053	0	0	0.17575	0	437.17	5.5792	1.9191	0.169
377	0	0	0	0	0	0	0	0	0	0	141.94	1.5224	3.1579	0.1152
378	-0.376268	0.0804924	0	0	1	4.69651	2	0	0.05783	0	385.39	4.0051	3.2269	0.0446

[truncated: 24 more sheets: Table S6-R-C, Table S7-C-R, Table S8-C-O, Table S9-O-D, Table S10-C-D, Table S11-R-O, Table S12-R-D, Table S13, Table S14-S15-PRI-山齿鹑, Table S16-S17-虹鳟鱼, Table S18-S19-大型蚤, Table S20-S21大鼠, Table S22-S23-R-C, Table S24-S25-C-R, Table S26-S27-C-O, Table S28-S29-O-D, Table S30-C-OStr-Top20, Table S31-O-Rnd-Top20, Table S32-D-Rnd-Top20, Table S33-R-ORes-Top20 …]
