# Supplementary material for: Ecotoxicological risk assessment of pesticides against different aquatic and terrestrial species: using mechanistic QSTR and iQSTTR modelling approaches to fill the toxicity data gap
Source: Royal Society of Chemistry journal article supplement (doi:10.1039/d3gc03109h), 2023-12-05
Supplement: d3gc03109h3.pdf [file d3gc03109h3.pdf]

## Electronic Supplementary Information

Supplementary Information related to this article were also deposited in “Mendeley Data” that can be found at [“https://data.mendeley.com/datasets/bs3zjdwcp/draft?a=d09e1d8e-79ca-468d-aae4-b95105294bbe”](https://data.mendeley.com/datasets/bs3zjdwcp/draft?a=d09e1d8e-79ca-468d-aae4-b95105294bbe). Sun, Guohui (2023), “Ecotoxicological risk assessment of pesticides against different aquatic and terrestrial species: using mechanistic QSTR and iQSTTR modelling approaches to fill toxicity data gap”, Mendeley Data, V1.
